# Supplementary material for: Base-promoted selective C2–N1 ring-expansion reaction of indolones toward substituted quinolines
Source: Royal Society of Chemistry journal article supplement (doi:10.1039/d3qo00818e), 2023-01-01

# Supporting Information

## Base-Promoted Selective C2–N1 Ring-Expansion Reaction of Indolones toward Substituted Quinolines

Qiongwen Kang,<sup>a</sup> Mengdan Wang,<sup>a</sup> Zongkang Wang,<sup>a</sup> Lu Cheng,<sup>a</sup> Yilin Zhu,<sup>a</sup>  
Chengyu Wang,<sup>\*b</sup> and Yanzhong Li <sup>\*a</sup>

<sup>a</sup>School of Chemistry and Molecular Engineering, East China Normal University, 500 Dongchuan Road, Shanghai 200241, China.

<sup>b</sup>School of Chemistry and Chemical Engineering, Linyi University, Shuangling Road, Linyi, Shandong, 276000, China

Fax: (+86) 021-54340096, E-mail: [yzli@chem.ecnu.edu.cn](mailto:yzli@chem.ecnu.edu.cn)

### Table of Contents

|                                                                        |    |
|------------------------------------------------------------------------|----|
| 1. General information .....                                           | 2  |
| 2. Synthesis of <b>1</b> .....                                         | 2  |
| 3. Synthesis of <b>2</b> .....                                         | 5  |
| 4. Synthesis of <b>3</b> .....                                         | 8  |
| 5. 1.0 mmol Scale reaction .....                                       | 19 |
| 6. Synthesis of <b>4a</b> and <b>5a</b> .....                          | 19 |
| 7. Mechanistic Experiments .....                                       | 20 |
| 8. References .....                                                    | 22 |
| 9. Copies of spectra of new products.....                              | 23 |
| 10. X-ray crystallography of compounds <b>2p</b> and <b>3a</b> . ..... | 60 |

## 1. General information

Unless noted, all commercial reagents were used without further purification. Reactions were monitored by thin layer chromatography. Purification of reaction products was carried out by flash chromatography on silica gel (200~300 mesh).  $^1\text{H}$  NMR spectra were recorded at 500 MHz or 600 MHz;  $^{13}\text{C}$  NMR spectra were recorded at 125 MHz or 150 MHz in  $\text{CDCl}_3$  (containing 0.03% TMS) or  $\text{d}^6$ -DMSO solutions.  $^1\text{H}$  NMR spectra were recorded with tetramethylsilane ( $\delta = 0.00$  ppm) or  $\text{d}^6$ -DMSO ( $\delta = 2.50$  ppm) as the internal reference;  $^{13}\text{C}$  NMR spectra were recorded with  $\text{CDCl}_3$  ( $\delta = 77.00$  ppm) or  $\text{d}^6$ -DMSO ( $\delta = 39.52$  ppm) as the internal reference. High-resolution mass spectra were recorded on a mass spectrometer with a TOF (for EI or ESI) or FT-ICR (for MALDI) analyzer. Single crystal X-ray diffraction data was collected in Bruker SMARTAPEX diffractometers with molybdenum cathodes.

## 2. Synthesis of 1

**General procedure: Synthesis of 1<sup>[1,2]</sup>(Take 1a as an example).**

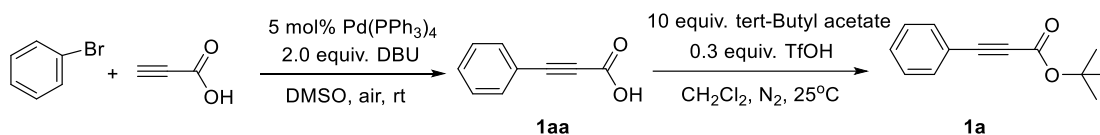

Propiolic acid (2.4 mmol, 1.2 equiv., 148  $\mu\text{L}$ ) was diluted with DMSO (2.5 mL). The solution was added to a mixture of  $\text{Pd}(\text{PPh}_3)_4$  (0.1 mmol, 115.6 mg), aryl bromide (2.0 mmol), DBU (4.0 mmol, 0.6 mL), and DMSO (2.5 mL) in a small round-bottom flask at room temperature and stirred overnight. After the reaction finished, the reaction mixture was diluted with 25 mL of ethyl acetate, and extracted with saturated aqueous  $\text{NaHCO}_3$  solution. The aqueous layer was separated, acidified to  $\text{pH} = 1$  with 2M HCl, and extracted with  $\text{CH}_2\text{Cl}_2$ . The combined organic layers were washed with brine, dried ( $\text{Na}_2\text{SO}_4$ ) and concentrated in vacuo of **1aa** as a white solid (263.1 mg, 90%).

To a solution of phenylpropionic acid (1 mmol, 0.1461 g) in 10 mL of DCM at  $25^\circ\text{C}$

was added *t*BuOAc (10 mmol, 10 equiv., 1.34 ml) and TfOH (0.3 mmol, 0.3 equiv., 32  $\mu$ L) dropwise. The resulting solution was stirred at room temperature for 2 hours and carefully washed with saturated NaHCO<sub>3</sub>. The aqueous layer was extracted 3 times with DCM and the combined extracts were wash with saturated NaCl then dried over Na<sub>2</sub>SO<sub>4</sub>, filtered, and concentrated under reduced pressure. The resulting oil was purified by column chromatography to give **1a** (77%) as a colourless oil.

Other tert-butyl 3-propiolates (**1b – 1j**) were prepared by using the same procedure as that of tert-butyl 3-phenylpropiolate (**1a**).

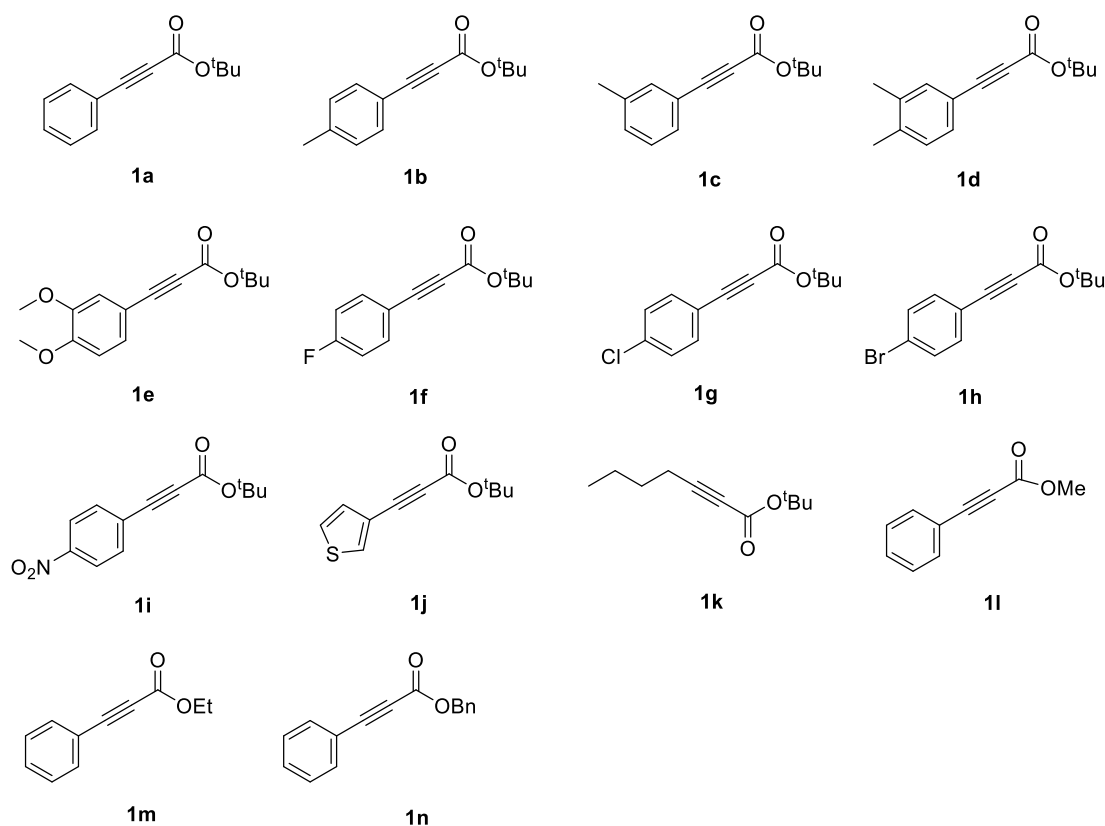

alkynoates **1k**,<sup>[3]</sup> **1l-1n**<sup>[2]</sup> were synthesized according to the reported methods. The analytical data of **1d-1f** and **1i** are as follows.

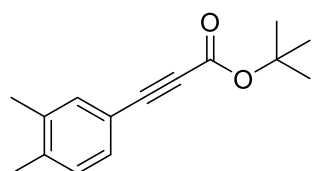

*tert*-butyl 3-(3,4-dimethylphenyl)propiolate (**1d**). Yellow solid, obtained in 2 h and purified by chromatography on silica gel (petroleum ether/ethyl acetate = 10:1); yield:

(0.8 mmol scale, 141.4 mg, 77%); m.p. 45-47 °C.  $^1\text{H}$  NMR (500 MHz,  $\text{CDCl}_3$ )  $\delta$ . 7.36 (s, 1H), 7.31 (d,  $J = 7.5$  Hz, 1H), 7.11 (d,  $J = 7.5$  Hz, 1H), 2.27 (s, 3H), 2.24 (s, 3H), 1.54 (s, 9H).  $^{13}\text{C}$  NMR (125 MHz,  $\text{CDCl}_3$ )  $\delta$  153.3, 139.7, 136.9, 133.9, 130.4, 129.8, 117.1, 84.5, 83.2, 81.5, 28.1, 19.9, 19.5. HRMS (ESI) calcd for  $\text{C}_{15}\text{H}_{18}\text{NaO}_2$ ,  $[\text{M}+\text{Na}]^+$ : 253.1199, found: 253.1202.

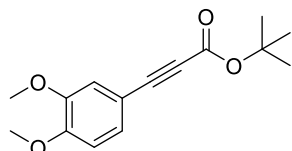

**tert-butyl 3-(3,4-dimethoxyphenyl)propiolate (1e).** Light yellow solid, obtained in 2 h and purified by chromatography on silica gel (petroleum ether/ethyl acetate = 10:1); yield: (0.5 mmol scale, 70.5 mg, 54%); m.p. 67-69 °C.  $^1\text{H}$  NMR (500 MHz,  $\text{CDCl}_3$ )  $\delta$ . 7.22 (dd,  $J_1 = 8.0$  Hz,  $J_2 = 2.0$  Hz, 1H), 7.07 (d,  $J = 2.0$  Hz, 1H), 6.83 (d,  $J = 8.0$  Hz, 1H), 3.91 (s, 3H), 3.88 (s, 3H), 1.54 (d, 9H).  $^{13}\text{C}$  NMR (125 MHz,  $\text{CDCl}_3$ )  $\delta$  153.3, 151.2, 148.6, 127.0, 115.2, 111.8, 110.9, 84.6, 83.3, 81.1, 55.93, 55.90, 28.1. HRMS (ESI) calcd for  $\text{C}_{15}\text{H}_{18}\text{NaO}_4$ ,  $[\text{M}+\text{Na}]^+$ : 285.1097, found: 285.1100.

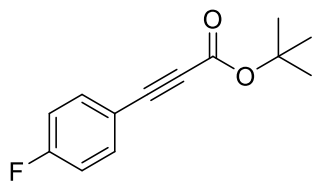

**tert-butyl 3-(4-fluorophenyl)propiolate (1f).** Yellow oil, obtained in 2 h and purified by chromatography on silica gel (petroleum ether/ethyl acetate = 10:1); yield: (1.0 mmol scale, 145.3 mg, 66%);  $^1\text{H}$  NMR (500 MHz,  $\text{CDCl}_3$ )  $\delta$ . 7.59-7.55 (m, 2H), 7.08-7.04 (m, 2H), 1.55 (s, 9H).  $^{13}\text{C}$  NMR (125 MHz,  $\text{CDCl}_3$ )  $\delta$  163.7 (d,  $J_{\text{C-F}} = 251.1$  Hz), 153.0, 135.0 (d,  $J_{\text{C-F}} = 8.75$  Hz), 116.0 (d,  $J_{\text{C-F}} = 22.2$  Hz), 83.6, 82.7, 81.9, 28.0. HRMS (ESI) calcd for  $\text{C}_{13}\text{H}_{13}\text{NaFO}_2$ ,  $[\text{M}+\text{Na}]^+$ : 243.0792, found: 243.0798.

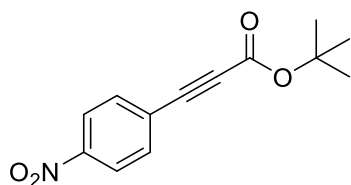

*tert-butyl 3-(4-nitrophenyl)propiolate* (**1i**). Light yellow solid, obtained in 2 h and purified by chromatography on silica gel (petroleum ether/ethyl acetate = 10:1); yield: (0.6 mmol scale, 137.8 mg, 93%); m.p. 115-117 °C. <sup>1</sup>H NMR (500 MHz, CDCl<sub>3</sub>) δ. 8.24 (d, *J* = 7.5 Hz, 2H), 7.73 (d, *J* = 7.5 Hz, 2H), 1.56 (s, 9H). <sup>13</sup>C NMR (125 MHz, CDCl<sub>3</sub>) δ 152.3, 148.3, 133.5, 126.7, 123.6, 85.6, 84.4, 80.6, 28.0. HRMS (ESI) calcd for C<sub>13</sub>H<sub>13</sub>NaNO<sub>4</sub>, [M+Na]<sup>+</sup>: 270.0737, found: 270.0744.

### 3. Synthesis of 2

**General procedure: Synthesis of 2 (Take 2a as an example).**

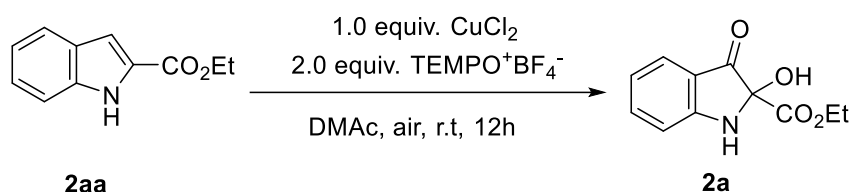

To a solution of ethyl 1H-indole-2-carboxylate (2.0 mmol, 0.378 g), CuCl<sub>2</sub> (2.0 mmol, 0.2689 g), TEMPO<sup>+</sup>BF<sub>4</sub><sup>-</sup> (4.0 mmol, 0.9722g) and three drops of water in DMAc (4 mL) at room temperature and stirred overnight. The reaction mixture was treated with H<sub>2</sub>O, then extracted with EA and dried over Na<sub>2</sub>SO<sub>4</sub>. After removal of the EA, the residue was purified by chromatography on silica gel (PE: EA = 2:1) to afford **2a**.

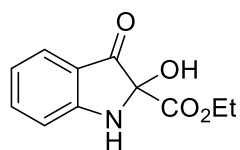

*ethyl 2-hydroxy-3-oxoindoline-2-carboxylate* (**2a**). Yellow solid, obtained in 12 h and purified by chromatography on silica gel (petroleum ether/ethyl acetate = 2:1); (5 mmol scale, 0.8988g, 81%); m.p. 96-98 °C. <sup>1</sup>H NMR (500 MHz, CDCl<sub>3</sub>) δ. 7.61 (d, *J* = 7.5 Hz, 1H), 7.52 (t, *J* = 7.5 Hz, 1H), 6.95-6.91 (m, 2H), 5.15 (s, 1H), 4.46 (s, 1H), 4.33-4.22 (m, 2H), 1.27-1.24 (m, 3H). <sup>13</sup>C NMR (125 MHz, CDCl<sub>3</sub>) δ. 195.9, 169.1, 160.8, 138.4, 125.6, 120.8, 118.4, 113.0, 86.1, 63.6, 13.9. HRMS (ESI) calcd for C<sub>11</sub>H<sub>11</sub>NaNO<sub>4</sub>, [M+Na]<sup>+</sup>: 244.0580, found: 244.0583.

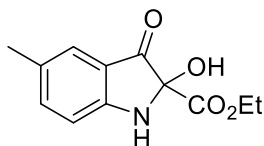

**ethyl 2-hydroxy-5-methyl-3-oxoindoline-2-carboxylate (2p)**. The structure of **2p** was confirmed by X-ray crystallography (CCDC 2264615). Yellow solid, obtained in 12 h and purified by chromatography on silica gel (petroleum ether/ethyl acetate = 2:1); (1.0 mmol scale, 167.4mg, 71%); m.p. 105-107 °C. <sup>1</sup>H NMR (500 MHz, CDCl<sub>3</sub>) δ. 7.39 (s, 1H), 7.33 (d, *J* = 8.0 Hz, 1H), 6.84 (d, *J* = 8.0 Hz, 1H), 5.18 (s, 1H), 4.60 (s, 1H), 4.29-4.21 (m, 2H), 2.30 (s, 3H), 1.26-1.23 (m, 3H). <sup>13</sup>C NMR (125 MHz, CDCl<sub>3</sub>) δ. 196.0, 169.2, 159.2, 139.6, 130.5, 125.0, 118.6, 113.0, 86.6, 63.5, 20.5, 13.9. HRMS (ESI) calcd for C<sub>12</sub>H<sub>13</sub>NaNO<sub>4</sub>, [M+Na]<sup>+</sup>: 258.0737, found: 258.0739.

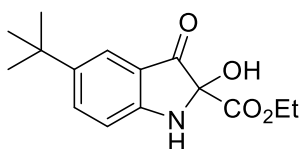

**ethyl 5-(tert-butyl)-2-hydroxy-3-oxoindoline-2-carboxylate (2q)**. Yellow oil, obtained in 12 h and purified by chromatography on silica gel (petroleum ether/ethyl acetate = 2:1); (1.3 mmol scale, 251.4mg, 70%); <sup>1</sup>H NMR (500 MHz, CDCl<sub>3</sub>) δ. 7.61-7.58 (m, 2H), 6.89-6.86 (m, 1H), 5.09 (s, 1H), 4.47 (s, 1H), 4.33-4.22 (m, 2H), 1.30 (s, 9H), 1.28-1.25 (m, 3H). <sup>13</sup>C NMR (125 MHz, CDCl<sub>3</sub>) δ. 196.2, 169.2, 159.1, 144.3, 136.5, 121.5, 118.2, 112.8, 86.6, 63.5, 34.4, 31.2, 14.0. HRMS (ESI) calcd for C<sub>15</sub>H<sub>19</sub>NaNO<sub>4</sub>, [M+Na]<sup>+</sup>: 300.1206, found: 300.1212.

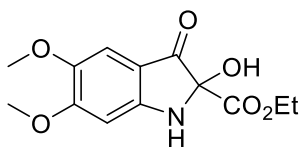

**ethyl 2-hydroxy-5,6-dimethoxy-3-oxoindoline-2-carboxylate (2r)**. Yellow oil, obtained in 12 h and purified by chromatography on silica gel (petroleum ether/ethyl acetate = 2:1); (1.0 mmol scale, 193.5mg, 69%); <sup>1</sup>H NMR (500 MHz, d<sup>6</sup>-DMSO) δ. 7.53 (s, 1H), 6.90 (d, *J* = 1.0 Hz, 1H), 6.85 (s, 1H), 6.38 (d, *J* = 1.0 Hz, 1H), 4.12-4.05

(m, 2H), 3.84 (s, 3H), 3.70 (s, 3H), 1.12 (t,  $J = 6.8$  Hz, 3H).  $^{13}\text{C}$  NMR (125 MHz,  $\text{d}^6$ -DMSO)  $\delta$ . 194.9, 168.7, 159.3, 158.6, 143.5, 108.4, 104.9, 94.9, 86.9, 61.2, 56.0, 55.8, 14.0. HRMS (EI) calcd for  $\text{C}_{13}\text{H}_{15}\text{NaNO}_6$ ,  $[\text{M}+\text{Na}]^+$ : 304.0792, found: 304.0789.

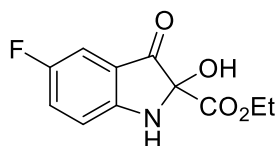

**ethyl 5-fluoro-2-hydroxy-3-oxoindoline-2-carboxylate (2s).** Yellow solid, obtained in 12 h and purified by chromatography on silica gel (petroleum ether/ethyl acetate = 2:1); (1.3 mmol scale, 233.9 mg, 75%); m.p. 102-105 °C.  $^1\text{H}$  NMR (500 MHz,  $\text{CDCl}_3$ )  $\delta$ . 7.30-7.25 (m, 2H), 6.91-6.89 (m, 1H), 5.24 (s, 1H), 4.67 (s, 1H), 4.33-4.22 (m, 2H), 1.25 (t,  $J = 7.0$  Hz, 3H).  $^{13}\text{C}$  NMR (125 MHz,  $\text{CDCl}_3$ )  $\delta$ . 195.7 (d,  $J_{\text{C-F}} = 3.8$  Hz), 168.8, 157.4 (d,  $J_{\text{C-F}} = 240.4$  Hz), 157.3, 126.1 (d,  $J_{\text{C-F}} = 24.9$  Hz), 119.0 (d,  $J_{\text{C-F}} = 7.6$  Hz), 114.2 (d,  $J_{\text{C-F}} = 7.5$  Hz), 110.7 (d,  $J_{\text{C-F}} = 23.0$  Hz), 87.0, 63.7, 13.9. HRMS (ESI) calcd for  $\text{C}_{11}\text{H}_{10}\text{FNaNO}_4$ ,  $[\text{M}+\text{Na}]^+$ : 262.0486, found: 262.0491.

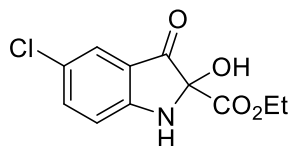

**ethyl 5-chloro-2-hydroxy-3-oxoindoline-2-carboxylate (2t).** Yellow solid, obtained in 12 h and purified by chromatography on silica gel (petroleum ether/ethyl acetate = 2:1); (1.0 mmol scale, 210 mg, 82%); m.p. 78-80 °C.  $^1\text{H}$  NMR (500 MHz,  $\text{CDCl}_3$ )  $\delta$ . 7.55 (s, 1H), 7.45 (d,  $J = 8.5$  Hz, 1H), 6.87 (d,  $J = 8.5$  Hz, 1H), 5.29 (s, 1H), 4.64 (s, 1H), 4.31-4.23 (m, 2H), 1.25 (t,  $J = 7.2$  Hz, 3H).  $^{13}\text{C}$  NMR (125 MHz,  $\text{CDCl}_3$ )  $\delta$ . 194.9, 168.7, 159.0, 138.1, 126.1, 124.9, 119.4, 114.1, 86.5, 63.8, 13.9. HRMS (ESI) calcd for  $\text{C}_{11}\text{H}_{10}\text{ClNaNO}_4$ ,  $[\text{M}+\text{Na}]^+$ : 278.0191, found: 278.0193.

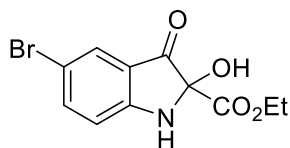

**ethyl 5-bromo-2-hydroxy-3-oxoindoline-2-carboxylate (2u).** Yellow solid, obtained in 12 h and purified by chromatography on silica gel (petroleum ether/ethyl acetate = 2:1); (1.2 mmol scale, 254.4 mg, 71%); m.p. 95-97 °C. <sup>1</sup>H NMR (600 MHz, CDCl<sub>3</sub>) δ. 7.70 (s, 1H), 7.57 (d, *J* = 8.4 Hz, 1H), 6.82 (d, *J* = 8.4 Hz, 1H), 5.36 (s, 1H), 4.69 (s, 1H), 4.31-4.21 (m, 2H), 1.24 (t, *J* = 7.2 Hz, 3H). <sup>13</sup>C NMR (150 MHz, CDCl<sub>3</sub>) δ. 194.7, 168.7, 159.4, 140.8, 128.0, 119.9, 114.5, 112.9, 86.4, 63.7, 13.9. HRMS (ESI) calcd for C<sub>11</sub>H<sub>10</sub>BrNaNO<sub>4</sub>, [M+Na]<sup>+</sup>: 321.9685, found: 321.9684.

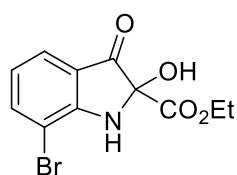

**ethyl 7-bromo-2-hydroxy-3-oxoindoline-2-carboxylate (2v).** Yellow solid, obtained in 12 h and purified by chromatography on silica gel (petroleum ether/ethyl acetate = 2:1); (0.9 mmol scale, 219 mg, 81%); m.p. 105-107 °C. <sup>1</sup>H NMR (600 MHz, CDCl<sub>3</sub>) δ. 7.68 (d, *J* = 8.0 Hz 1H), 7.57 (d, *J* = 8.0 Hz, 1H), 6.83 (d, *J* = 7.8 Hz, 1H), 5.39 (s, 1H), 4.66 (s, 1H), 4.35-4.23 (m, 2H), 1.26 (t, *J* = 7.2 Hz, 3H). <sup>13</sup>C NMR (150 MHz, CDCl<sub>3</sub>) δ. 195.4, 168.7, 158.3, 140.2, 124.5, 121.6, 119.8, 106.3, 85.9, 63.8, 13.9. HRMS (ESI) calcd for C<sub>11</sub>H<sub>10</sub>BrNaNO<sub>4</sub>, [M+Na]<sup>+</sup>: 321.9685, found: 321.9690.

## 4. Synthesis of 3

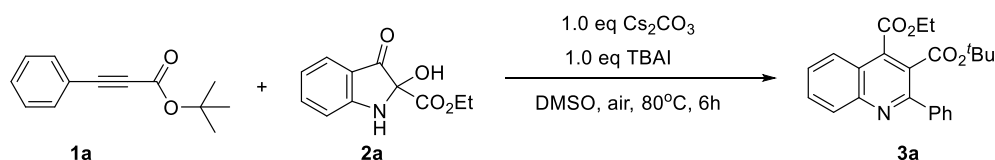

In a Schlenk tube, indolone **2a** (0.15 mmol, 1.4 equiv., 30.9 mg), Cs<sub>2</sub>CO<sub>3</sub> (0.1 mmol, 32.6 mg), TBAI (0.1 mmol, 36.9 mg), DMSO (1.0 mL), and alkynoate **1a** (0.1 mmol, 20.2 mg) were stirred at 80 °C in the oil bath for 6h under air. Then, the reaction mixture was cooled to room temperature and was treated with saturated NH<sub>4</sub>Cl, then extracted



with EA and dried over anhydrous Na<sub>2</sub>SO<sub>4</sub>. After removal of the EA, the residue was purified by chromatography on basic silica gel (PE: EA = 10: 1) to afford **3a** (light yellow solid, 28.9 mg, 77%).

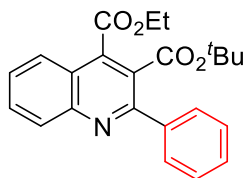

**3-(tert-butyl) 4-ethyl 2-phenylquinoline-3,4-dicarboxylate (3a)**. Light yellow solid, obtained in 6 h and purified by chromatography on silica gel (petroleum ether/ethyl acetate = 10:1); yield: (28.9 mg, 77%); m.p. 112-114 °C. <sup>1</sup>H NMR (500 MHz, CDCl<sub>3</sub>) δ. 8.19 (d, *J* = 8.5 Hz, 1H), 8.00 (d, *J* = 8.5 Hz, 1H), 7.81 (t, *J* = 7.8 Hz, 1H), 7.66-7.62 (m, 3H), 7.48-7.46 (m, 3H), 4.55 (q, *J* = 7.2 Hz, 2H), 1.46 (t, *J* = 7.2 Hz, 3H), 1.29 (s, 9H). <sup>13</sup>C NMR (125 MHz, CDCl<sub>3</sub>) δ 166.5, 166.1, 157.2, 147.8, 140.4, 139.6, 131.2, 129.9, 128.7, 128.7, 128.3, 128.0, 125.3, 125.2, 122.2, 83.1, 62.5, 27.4, 14.1. HRMS (ESI) calcd for C<sub>23</sub>H<sub>24</sub>NO<sub>4</sub>, [M+H]<sup>+</sup>: 378.1700, found: 378.1704.

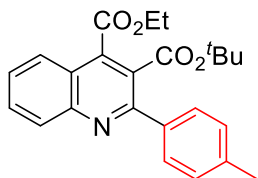

**3-(tert-butyl) 4-ethyl 2-(p-tolyl)quinoline-3,4-dicarboxylate (3b)**. Light yellow solid, obtained in 6 h and purified by chromatography on silica gel (petroleum ether/ethyl acetate = 10:1); yield: (28.0 mg, 72%); m.p. 106-108 °C. <sup>1</sup>H NMR (500 MHz, CDCl<sub>3</sub>) δ. 8.17 (d, *J* = 8.5 Hz, 1H), 7.97 (d, *J* = 8.5 Hz, 1H), 7.79 (t, *J* = 7.5 Hz, 1H), 7.61 (m, *J* = 7.8 Hz 1H), 7.55 (d, *J* = 8.0 Hz, 2H), 7.29 (d, *J* = 7.5 Hz, 2H), 4.57-4.53 (q, *J* = 7.2 Hz, 2H), 2.42 (s, 3H), 1.47-1.44 (t, *J* = 7.2 Hz, 3H), 1.33 (s, 9H). <sup>13</sup>C NMR (125 MHz, CDCl<sub>3</sub>) δ 166.5, 166.2, 157.2, 147.9, 139.5, 138.7, 137.5, 131.0, 129.9, 128.9, 128.6, 127.8, 125.2, 125.1, 122.1, 83.1, 62.5, 27.5, 21.3, 14.1. HRMS (ESI) calcd for C<sub>24</sub>H<sub>26</sub>NO<sub>4</sub>, [M+H]<sup>+</sup>: 392.1856, found: 392.1862.

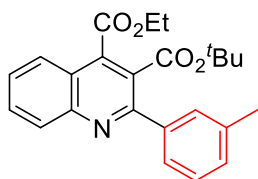

**3-(tert-butyl) 4-ethyl 2-(m-tolyl)quinoline-3,4-dicarboxylate (3c).** Light yellow solid, obtained in 6 h and purified by chromatography on silica gel (petroleum ether/ethyl acetate = 10:1); yield: (30.5 mg, 78%); m.p. 86-88 °C. <sup>1</sup>H NMR (500 MHz, CDCl<sub>3</sub>) δ. 8.19 (d, *J* = 8.5 Hz, 1H), 7.99 (d, *J* = 8.5 Hz, 1H), 7.80 (t, *J* = 7.8 Hz, 1H), 7.63 (t, *J* = 7.8 Hz, 1H), 7.45-7.44 (m, 2H), 7.38-7.35 (m, 1H), 7.28-7.26 (m, 1H), 4.56 (q, *J* = 7.0 Hz, 2H), 2.42 (s, 3H), 1.46 (t, *J* = 7.0 Hz, 3H), 1.30 (s, 9H). <sup>13</sup>C NMR (125 MHz, CDCl<sub>3</sub>) δ. 166.5, 166.2, 157.4, 147.8, 140.3, 139.6, 137.9, 131.1, 129.9, 129.5, 129.2, 128.3, 127.9, 125.8, 125.3, 125.2, 122.2, 83.1, 62.5, 27.4, 21.4, 14.1. HRMS (ESI) calcd for C<sub>24</sub>H<sub>26</sub>NO<sub>4</sub>, [M+H]<sup>+</sup>: 392.1856, found: 392.1859.

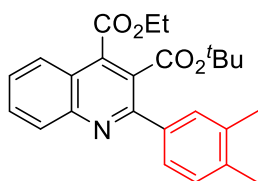

**3-(tert-butyl) 4-ethyl 2-(3,4-dimethylphenyl)quinoline-3,4-dicarboxylate (3d).** Grey white solid, obtained in 6 h and purified by chromatography on silica gel (petroleum ether/ethyl acetate = 10:1); yield: (28.0 mg, 69%); m.p. 104-106 °C. <sup>1</sup>H NMR (500 MHz, CDCl<sub>3</sub>) δ. 8.18 (d, *J* = 8.5 Hz, 1H), 7.97 (d, *J* = 8.5 Hz, 1H), 7.79 (t, *J* = 7.8 Hz, 1H), 7.61 (t, *J* = 7.8 Hz, 1H), 7.42 (s, 1H), 7.39 (d, *J* = 7.5 Hz, 1H), 7.23 (d, *J* = 7.5 Hz, 1H), 4.55 (q, *J* = 7.2 Hz, 2H), 2.32 (s, 6H), 1.46 (t, *J* = 7.2 Hz, 3H), 1.33 (s, 9H). <sup>13</sup>C NMR (125 MHz, CDCl<sub>3</sub>) δ. 166.6, 166.3, 157.4, 147.8, 139.4, 137.8, 137.4, 136.4, 131.0, 129.9, 129.8, 129.6, 127.8, 126.1, 125.2, 125.1, 122.1, 83.0, 62.5, 27.5, 19.8, 19.6, 14.1. HRMS (ESI) calcd for C<sub>25</sub>H<sub>28</sub>NO<sub>4</sub>, [M+H]<sup>+</sup>: 406.2013, found: 406.2022.

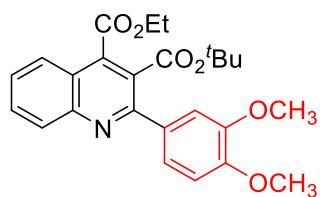

**3-(tert-butyl) 4-ethyl 2-(3,4-dimethoxyphenyl)quinoline-3,4-dicarboxylate (3e).**

Yellow solid, obtained in 6 h and purified by chromatography on silica gel (petroleum ether/ethyl acetate = 10:1); yield: (18.8 mg, 43%); m.p. 115-117 °C. <sup>1</sup>H NMR (500 MHz, CDCl<sub>3</sub>) δ. 8.18 (d, *J* = 8.5 Hz, 1H), 7.98 (d, *J* = 8.5 Hz, 1H), 7.80 (t, *J* = 7.8 Hz, 1H), 7.62 (t, *J* = 7.8 Hz, 1H), 7.27-7.26 (m, 1H), 7.22-7.19 (m, 1H), 6.98-6.96 (m, 1H), 4.56 (q, *J* = 7.0 Hz, 2H), 3.95 (s, 6H), 1.47 (t, *J* = 7.2 Hz, 3H), 1.34 (s, 9H). <sup>13</sup>C NMR (125 MHz, CDCl<sub>3</sub>) δ. 166.5, 166.4, 156.7, 149.8, 148.9, 147.8, 139.4, 133.1, 131.1, 129.8, 127.8, 125.3, 125.1, 122.1, 121.5, 111.8, 110.9, 83.1, 62.5, 56.1, 55.9, 27.6, 14.1. HRMS (ESI) calcd for C<sub>25</sub>H<sub>27</sub>NaNO<sub>6</sub>, [M+Na]<sup>+</sup>: 460.1731, found: 460.1735.

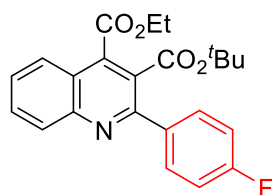

**3-(tert-butyl) 4-ethyl 2-(4-fluorophenyl)quinoline-3,4-dicarboxylate (3f).** Light yellow solid, obtained in 6 h and purified by chromatography on silica gel (petroleum ether/ethyl acetate = 10:1); yield: (24.9 mg, 63%); m.p. 83-85 °C. <sup>1</sup>H NMR (500 MHz, CDCl<sub>3</sub>) δ. 8.17 (d, *J* = 8.5 Hz, 1H), 7.99 (d, *J* = 8.5 Hz, 1H), 7.82 (t, *J* = 7.2 Hz, 1H), 7.66-7.63 (m, 3H), 7.18 (t, *J* = 8.5 Hz, 2H), 4.56 (q, *J* = 7.2 Hz, 2H), 1.46 (t, *J* = 7.2 Hz, 3H), 1.33 (s, 9H). <sup>13</sup>C NMR (125 MHz, CDCl<sub>3</sub>) δ. 166.4, 166.1, 164.3 (d, *J*<sub>C-F</sub> = 246.9 Hz) 156.0, 147.8, 139.7, 136.5 (d, *J*<sub>C-F</sub> = 3.1 Hz), 131.3, 130.6 (d, *J*<sub>C-F</sub> = 8.2 Hz), 129.8, 128.1, 125.2, 125.1, 122.2, 115.3 (d, *J*<sub>C-F</sub> = 21.6 Hz), 83.3, 62.6, 27.5, 14.1. HRMS (ESI) calcd for C<sub>23</sub>H<sub>23</sub>FNO<sub>4</sub>, [M+H]<sup>+</sup>: 396.1606, found: 396.1614.

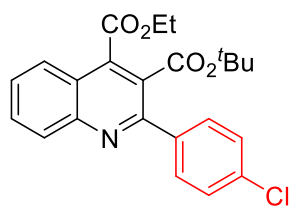

**3-(tert-butyl) 4-ethyl 2-(4-chlorophenyl)quinoline-3,4-dicarboxylate (3g).** Grey white solid, obtained in 6 h and purified by chromatography on silica gel (petroleum ether/ethyl acetate = 10:1); yield: (26.4 mg, 64%); m.p. 97-99 °C. <sup>1</sup>H NMR (500 MHz, CDCl<sub>3</sub>) δ. 8.17 (d, *J* = 8.5 Hz, 1H), 7.99 (d, *J* = 8.5 Hz, 1H), 7.82 (t, *J* = 7.8 Hz, 1H), 7.65 (t, *J* = 7.8 Hz, 1H), 7.61 (d, *J* = 6.5 Hz, 2H), 7.47 (d, *J* = 6.5 Hz, 2H), 4.56 (q, *J* = 7.0 Hz, 2H), 1.46 (t, *J* = 7.0 Hz, 3H), 1.34 (s, 9H). <sup>13</sup>C NMR (125 MHz, CDCl<sub>3</sub>) δ. 166.4, 166.0, 155.9, 147.9, 139.9, 138.8, 135.1, 131.4, 130.1, 129.9, 128.5, 128.3, 125.2, 125.0, 122.3, 83.5, 62.6, 27.6, 14.1. HRMS (ESI) calcd for C<sub>23</sub>H<sub>22</sub>NaClNO<sub>4</sub>, [M+Na]<sup>+</sup>: 434.1130, found: 434.1133.

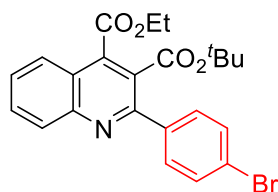

**3-(tert-butyl) 4-ethyl 2-(4-bromophenyl)quinoline-3,4-dicarboxylate (3h).** Grey white solid, obtained in 6 h and purified by chromatography on silica gel (petroleum ether/ethyl acetate = 10:1); yield: (28.8 mg, 63%); m.p. 126-128 °C. <sup>1</sup>H NMR (500 MHz, CDCl<sub>3</sub>) δ. 8.17 (d, *J* = 8.5 Hz, 1H), 7.98 (d, *J* = 8.5 Hz, 1H), 7.82 (t, *J* = 7.8 Hz, 1H), 7.66-7.62 (m, 3H), 7.54 (d, *J* = 8.5 Hz, 2H), 4.56 (q, *J* = 7.0 Hz, 2H), 1.46 (t, *J* = 7.2 Hz, 3H), 1.34 (s, 9H). <sup>13</sup>C NMR (125 MHz, CDCl<sub>3</sub>) δ 166.3, 165.9, 155.9, 147.8, 139.9, 139.3, 131.4, 131.4, 130.4, 129.9, 128.2, 125.2, 124.9, 123.3, 122.3, 83.5, 62.6, 27.5, 14.1. HRMS (ESI) calcd for C<sub>23</sub>H<sub>22</sub>NaBrNO<sub>4</sub>, [M+Na]<sup>+</sup>: 478.0624, found: 478.0633.

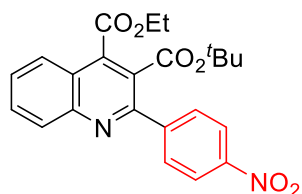

**3-(tert-butyl) 4-ethyl 2-(4-nitrophenyl)quinoline-3,4-dicarboxylate (3i).** Yellow solid, obtained in 6 h and purified by chromatography on silica gel (petroleum ether/ethyl acetate = 10:1); yield: (21.9 mg, 52%); m.p. 159-161 °C. <sup>1</sup>H NMR (500 MHz, CDCl<sub>3</sub>) δ. 8.36 (d, *J* = 7.0 Hz, 2H), 8.19 (d, *J* = 8.5 Hz, 1H), 8.02 (d, *J* = 8.0 Hz, 1H), 7.88-7.84 (m, 3H), 7.70 (t, *J* = 7.5 Hz, 1H), 4.58 (q, *J* = 7.2 Hz, 2H), 1.47 (t, *J* = 7.0 Hz, 3H), 1.34 (s, 9H). <sup>13</sup>C NMR (125 MHz, CDCl<sub>3</sub>) δ. 166.1, 165.4, 154.8, 148.0, 147.8, 146.6, 140.4, 131.8, 130.0, 129.8, 128.8, 125.3, 124.6, 123.5, 122.6, 83.8, 62.7, 27.6, 14.1. HRMS (ESI) calcd for C<sub>23</sub>H<sub>23</sub>N<sub>2</sub>O<sub>6</sub>, [M+H]<sup>+</sup>: 423.1551, found: 423.1550.

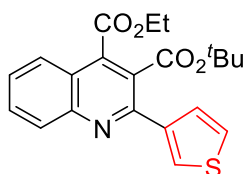

**3-(tert-butyl) 4-ethyl 2-(thiophen-3-yl)quinoline-3,4-dicarboxylate (3j).** Light yellow solid, obtained in 6 h and purified by chromatography on silica gel (petroleum ether/ethyl acetate = 10:1); yield: (25.8 mg, 67%); m.p. 130-132 °C. <sup>1</sup>H NMR (500 MHz, CDCl<sub>3</sub>) δ. 8.16 (d, *J* = 8.5 Hz, 1H), 7.97 (d, *J* = 8.5 Hz, 1H), 7.79 (t, *J* = 7.8 Hz, 1H), 7.67 (s, 1H), 7.62 (t, *J* = 7.8 Hz, 1H), 7.47-7.46 (m, 1H), 7.42-7.40 (m, 1H), 4.55 (q, *J* = 7.2 Hz, 2H), 1.46 (t, *J* = 7.2 Hz, 3H), 1.40 (s, 9H). <sup>13</sup>C NMR (125 MHz, CDCl<sub>3</sub>) δ. 166.4, 166.3, 152.0, 147.9, 141.1, 139.0, 131.1, 129.8, 128.4, 127.9, 125.63, 125.60, 125.4, 125.2, 122.2, 83.4, 62.5, 27.6, 14.1. HRMS (ESI) calcd for C<sub>21</sub>H<sub>22</sub>NO<sub>4</sub>S, [M+H]<sup>+</sup>: 384.1264, found: 384.1266.

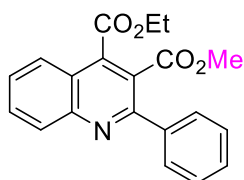

**4-ethyl 3-methyl 2-phenylquinoline-3,4-dicarboxylate (3l).** Yellow oil, obtained in 2 h and purified by chromatography on silica gel (petroleum ether/ethyl acetate = 10:1); yield: (12.6 mg, 38%); <sup>1</sup>H NMR (600 MHz, CDCl<sub>3</sub>) δ. 8.21 (d, *J* = 9.0 Hz, 1H), 8.10

(d,  $J = 8.4$  Hz, 1H), 7.83 (t,  $J = 7.8$  Hz, 1H), 7.68-7.64 (m, 3H), 7.50-7.44 (m, 3H), 4.53 (q,  $J = 7.0$  Hz, 2H), 3.68 (s, 3H), 1.44 (t,  $J = 7.2$  Hz, 3H).  $^{13}\text{C}$  NMR (150 MHz,  $\text{CDCl}_3$ )  $\delta$  168.0, 166.0, 156.6, 148.2, 139.8, 139.3, 131.4, 130.0, 129.0, 128.5, 128.3, 128.2, 125.3, 124.4, 122.1, 62.6, 52.6, 14.0. HRMS (ESI) calcd for  $\text{C}_{20}\text{H}_{17}\text{NaNO}_4$ ,  $[\text{M}+\text{Na}]^+$ : 358.1050, found: 358.1054.

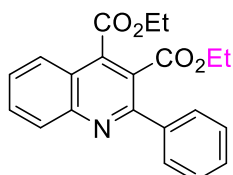

**diethyl 2-phenylquinoline-3,4-dicarboxylate (3m)**. Light yellow solid, obtained in 2 h and purified by chromatography on silica gel (petroleum ether/ethyl acetate = 10:1); yield: (16.2 mg, 46%); m.p. 49-51 °C.  $^1\text{H}$  NMR (500 MHz,  $\text{CDCl}_3$ )  $\delta$ . 8.21 (d,  $J = 8.5$  Hz, 1H), 8.09 (d,  $J = 8.5$  Hz, 1H), 7.83 (t,  $J = 7.5$  Hz, 1H), 7.67-7.64 (m, 3H), 7.50-7.44 (m, 3H), 4.54 (q,  $J = 7.2$  Hz, 2H), 4.14 (q,  $J = 7.2$  Hz, 2H), 1.44 (t,  $J = 7.2$  Hz, 3H), 1.03 (t,  $J = 7.2$  Hz, 3H).  $^{13}\text{C}$  NMR (125 MHz,  $\text{CDCl}_3$ )  $\delta$  167.5, 166.1, 156.8, 148.2, 140.0, 139.3, 131.3, 130.0, 128.9, 128.4, 128.4, 128.2, 125.3, 124.6, 122.1, 62.5, 61.9, 14.0, 13.5. HRMS (ESI) calcd for  $\text{C}_{21}\text{H}_{20}\text{NO}_4$ ,  $[\text{M}+\text{H}]^+$ : 350.1387, found: 350.1387.

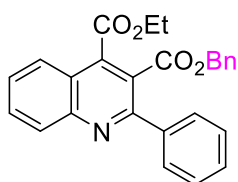

**3-benzyl 4-ethyl 2-phenylquinoline-3,4-dicarboxylate (3n)**. Yellow oil, obtained in 2 h and purified by chromatography on silica gel (petroleum ether/ethyl acetate = 10:1); yield: (19.4 mg, 47%);  $^1\text{H}$  NMR (600 MHz,  $\text{CDCl}_3$ )  $\delta$ . 8.20 (d,  $J = 8.4$  Hz, 1H), 8.08 (d,  $J = 8.4$  Hz, 1H), 7.83-7.81 (m, 1H), 7.65-7.61 (m, 3H), 7.43-7.40 (m, 3H), 7.30-7.24 (m, 3H), 7.05-7.04 (m, 2H), 5.10 (s, 2H), 4.42 (q,  $J = 7.2$  Hz, 2H), 1.36 (t,  $J = 7.2$  Hz, 3H).  $^{13}\text{C}$  NMR (150 MHz,  $\text{CDCl}_3$ )  $\delta$  167.4, 166.0, 156.6, 148.2, 139.8, 139.4, 134.5,

131.4, 130.0, 129.0, 128.5, 128.5, 128.5, 128.4, 128.2, 125.3, 124.3, 122.1, 67.8, 62.5, 14.0. HRMS (ESI) calcd for C<sub>26</sub>H<sub>22</sub>NO<sub>4</sub>, [M+H]<sup>+</sup>: 412.1543, found: 412.1544.

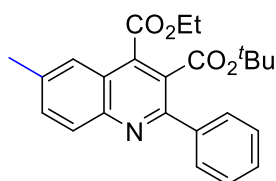

**3-(tert-butyl) 4-ethyl 6-methyl-2-phenylquinoline-3,4-dicarboxylate (3p).** Grey white solid, obtained in 6 h and purified by chromatography on silica gel (petroleum ether/ethyl acetate = 10:1); yield: (28.7 mg, 73%); m.p. 132-134 °C. <sup>1</sup>H NMR (600 MHz, CDCl<sub>3</sub>) δ. 8.08 (d, *J* = 8.4 Hz, 1H), 7.73 (s, 1H), 7.64-7.62 (m, 3H), 7.48-7.43 (m, 3H), 4.55 (q, *J* = 7.0 Hz, 2H), 2.56 (s, 3H), 1.45 (t, *J* = 7.2 Hz, 3H), 1.28 (s, 9H). <sup>13</sup>C NMR (150 MHz, CDCl<sub>3</sub>) δ. 166.7, 166.3, 156.3, 146.6, 140.6, 139.0, 138.2, 133.5, 129.6, 128.7, 128.6, 128.3, 125.1, 123.8, 122.2, 83.0, 62.4, 27.4, 21.9, 14.1. HRMS (ESI) calcd for C<sub>24</sub>H<sub>26</sub>NO<sub>4</sub>, [M+H]<sup>+</sup>: 392.1856, found: 392.1860.

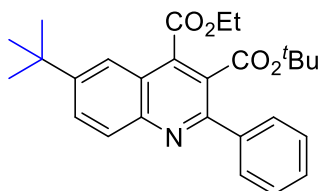

**3-(tert-butyl) 4-ethyl 6-(tert-butyl)-2-phenylquinoline-3,4-dicarboxylate (3q).** Grey white solid, obtained in 6 h and purified by chromatography on silica gel (petroleum ether/ethyl acetate = 10:1); yield: (24.8 mg, 57%); m.p. 103-105 °C. <sup>1</sup>H NMR (600 MHz, CDCl<sub>3</sub>) δ. 8.12 (d, *J* = 9.0 Hz, 1H), 7.91-7.89 (m, 1H), 7.63 (d, *J* = 7.8 Hz, 2H), 7.48-7.44 (m, 3H), 4.57 (q, *J* = 7.2 Hz, 2H), 1.48 (t, *J* = 7.2 Hz, 3H), 1.42 (s, 9H), 1.29 (s, 9H). <sup>13</sup>C NMR (150 MHz, CDCl<sub>3</sub>) δ. 166.8, 166.3, 156.6, 151.0, 146.5, 140.5, 139.5, 130.3, 129.4, 128.7, 128.6, 128.3, 125.2, 121.9, 119.9, 83.0, 62.3, 35.2, 31.0, 27.4, 14.2. HRMS (ESI) calcd for C<sub>27</sub>H<sub>32</sub>NO<sub>4</sub> [M+H]<sup>+</sup>: 434.2326, found: 434.2334.

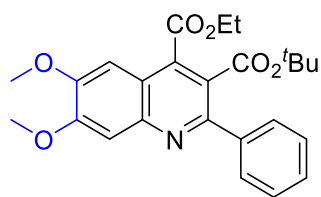

**3-(tert-butyl) 4-ethyl 6,7-dimethoxy-2-phenylquinoline-3,4-dicarboxylate (3r).**

Yellow solid, obtained in 6 h and purified by chromatography on silica gel (petroleum ether/ethyl acetate = 10:1); yield: (20.6 mg, 47%); m.p. 195-197 °C. <sup>1</sup>H NMR (600 MHz, CDCl<sub>3</sub>) δ. 7.60-7.58 (m, 2H), 7.50 (s, 1H), 7.47-7.42 (m, 3H), 7.27-7.25 (m, 1H), 4.54 (q, *J* = 7.2 Hz, 2H), 4.04 (s, 3H), 4.02 (s, 3H), 1.45 (t, *J* = 6.9 Hz, 3H), 1.27 (s, 9H). <sup>13</sup>C NMR (150 MHz, CDCl<sub>3</sub>) δ. 166.9, 166.5, 155.3, 153.8, 151.0, 145.6, 140.7, 137.5, 128.6, 128.4, 128.2, 123.7, 118.1, 108.3, 102.4, 82.8, 62.3, 56.3, 56.1, 27.4, 14.1. HRMS (ESI) calcd for C<sub>25</sub>H<sub>28</sub>NO<sub>6</sub>, [M+H]<sup>+</sup>: 438.1911, found: 438.1917.

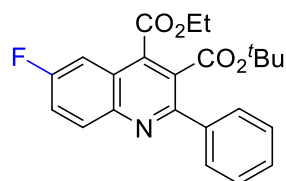

**3-(tert-butyl) 4-ethyl 6-fluoro-2-phenylquinoline-3,4-dicarboxylate (3s).** Light yellow solid, obtained in 6 h and purified by chromatography on silica gel (petroleum ether/ethyl acetate = 10:1); yield: (20.9 mg, 53%); m.p. 123-125 °C. <sup>1</sup>H NMR (600 MHz, CDCl<sub>3</sub>) δ. 8.20-8.18 (m, 1H), 7.68-7.66 (m, 1H), 7.64-7.62 (m, 2H), 7.60-7.56 (m, 1H), 7.50-7.47 (m, 3H), 4.55 (q, *J* = 7.2 Hz, 2H), 1.46 (t, *J* = 7.2 Hz, 3H), 1.29 (s, 9H). <sup>13</sup>C NMR (150 MHz, CDCl<sub>3</sub>) δ. 166.0, 165.9, 161.3, (d, *J*<sub>C-F</sub> = 248.8 Hz), 156.6 (d, *J*<sub>C-F</sub> = 2.7 Hz), 145.0, 140.0, 138.6 (d, *J*<sub>C-F</sub> = 5.8 Hz), 132.5 (d, *J*<sub>C-F</sub> = 9.3 Hz), 128.8, 128.6, 128.3, 126.4, 123.1 (d, *J*<sub>C-F</sub> = 10.5 Hz), 121.5 (d, *J*<sub>C-F</sub> = 25.6 Hz), 108.9 (d, *J*<sub>C-F</sub> = 24.0 Hz), 83.4, 62.7, 27.4, 14.1. HRMS (ESI) calcd for C<sub>23</sub>H<sub>23</sub>FNO<sub>4</sub>, [M+H]<sup>+</sup>: 396.1606, found: 396.1611.



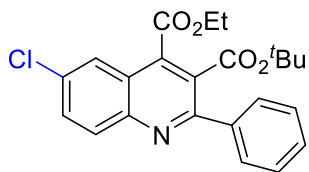

**3-(tert-butyl) 4-ethyl 6-chloro-2-phenylquinoline-3,4-dicarboxylate (3t).** Grey white solid, obtained in 6 h and purified by chromatography on silica gel (petroleum ether/ethyl acetate = 10:1); yield: (25.5 mg, 62%); m.p. 116-118 °C.  $^1\text{H}$  NMR (500 MHz,  $\text{CDCl}_3$ )  $\delta$ . 8.13-8.11 (m, 1H), 8.01-8.00 (m, 1H), 7.75-7.72 (m, 1H), 7.64-7.61 (m, 2H), 7.50-7.46 (m, 3H), 4.56 (q,  $J = 7.2$  Hz, 2H), 1.46 (t,  $J = 7.2$  Hz, 3H), 1.29 (s, 9H).  $^{13}\text{C}$  NMR (125 MHz,  $\text{CDCl}_3$ )  $\delta$ . 165.9, 165.8, 157.4, 146.2, 140.0, 138.5, 134.0, 132.1, 131.4, 128.9, 128.6, 128.4, 126.3, 124.1, 122.9, 83.5, 62.8, 27.4, 14.1. HRMS (ESI) calcd for  $\text{C}_{23}\text{H}_{22}\text{NaClNO}_4$ ,  $[\text{M}+\text{Na}]^+$ : 434.1130, found: 434.1134.

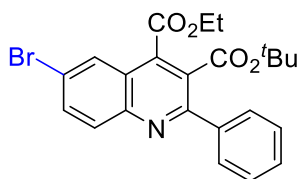

**3-(tert-butyl) 4-ethyl 6-bromo-2-phenylquinoline-3,4-dicarboxylate (3u).** Light yellow solid, obtained in 6 h and purified by chromatography on silica gel (petroleum ether/ethyl acetate = 10:1); yield: (33.8 mg, 74%); m.p. 132-134 °C.  $^1\text{H}$  NMR (500 MHz,  $\text{CDCl}_3$ )  $\delta$ . 8.18-8.17 (m, 1H), 8.06-8.04 (m, 1H), 7.88-7.86 (m, 1H), 7.64-7.62 (m, 2H), 7.50-7.46 (m, 3H), 4.56 (q,  $J = 7.2$  Hz, 2H), 1.46 (t,  $J = 7.2$  Hz, 3H), 1.29 (s, 9H).  $^{13}\text{C}$  NMR (125 MHz,  $\text{CDCl}_3$ )  $\delta$ . 165.9, 165.8, 157.6, 146.4, 140.0, 138.4, 134.7, 131.5, 129.0, 128.6, 128.4, 127.4, 126.3, 123.4, 122.3, 83.5, 62.8, 27.4, 14.1. HRMS (ESI) calcd for  $\text{C}_{23}\text{H}_{22}\text{NaBrNO}_4$ ,  $[\text{M}+\text{Na}]^+$ : 478.0624, found: 478.0630.

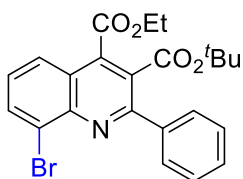

**3-(tert-butyl) 4-ethyl 8-bromo-2-phenylquinoline-3,4-dicarboxylate (3v).** Grey white solid, obtained in 6 h and purified by chromatography on silica gel (petroleum ether/ethyl acetate = 10:1); yield: (14.1 mg, 31%); m.p. 93-95 °C. <sup>1</sup>H NMR (500 MHz, CDCl<sub>3</sub>) δ. 8.14-8.12 (m, 1H), 7.94-7.92 (m, 1H), 7.78-7.76 (m, 2H), 7.50-7.44 (m, 4H), 4.55 (q, *J* = 7.2 Hz, 2H), 1.45 (t, *J* = 7.0 Hz, 3H), 1.31 (s, 9H). <sup>13</sup>C NMR (125 MHz, CDCl<sub>3</sub>) δ. 166.1, 166.0, 157.6, 144.7, 140.3, 139.8, 134.7, 129.1, 128.3, 128.1, 125.8, 125.7, 124.9, 123.5, 83.5, 62.7, 27.5, 14.1. HRMS (ESI) calcd for C<sub>23</sub>H<sub>23</sub>BrNO<sub>4</sub>, [M+H]<sup>+</sup>: 456.0805, found: 456.0809.

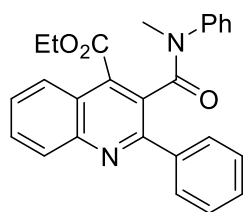

**ethyl 3-(methyl(phenyl)carbamoyl)-2-phenylquinoline-4-carboxylate (3w).** Yellow solid, obtained in 6 h and purified by chromatography on silica gel (petroleum ether/ethyl acetate = 10:1) yield: (19.3 mg, 47%); m.p. 165-167 °C. <sup>1</sup>H NMR (600 MHz, CDCl<sub>3</sub>) δ. 8.09 (d, *J* = 9.0 Hz, 1H), 8.04 (d, *J* = 9.0 Hz, 1H), 7.74-7.72 (m, 1H), 7.61-7.59 (m, 1H), 7.47-7.44 (m, 3H), 7.41-7.37 (m, 2H), 6.93 (t, *J* = 7.2 Hz, 1H), 6.84 (t, *J* = 7.8 Hz, 2H), 6.42 (d, *J* = 7.8 Hz, 2H), 4.70-4.59 (m, 2H), 3.29 (s, 3H), 1.51 (t, *J* = 7.2 Hz, 3H). <sup>13</sup>C NMR (150 MHz, CDCl<sub>3</sub>) δ. 168.2, 166.9, 154.5, 147.9, 141.9, 139.4, 139.2, 130.5, 129.9, 129.2, 129.1, 128.6, 128.3, 128.1, 127.7, 126.3, 125.6, 125.1, 122.4, 62.5, 37.0, 14.1. **3w** exists as a mixture of rotamers and the spectroscopic data of the major rotamer are reported. HRMS (ESI) calcd for C<sub>26</sub>H<sub>22</sub>NaN<sub>2</sub>O<sub>3</sub>, [M+Na]<sup>+</sup>: 433.1523, found: 433.1526.

## 5. 1.0 mmol Scale reaction

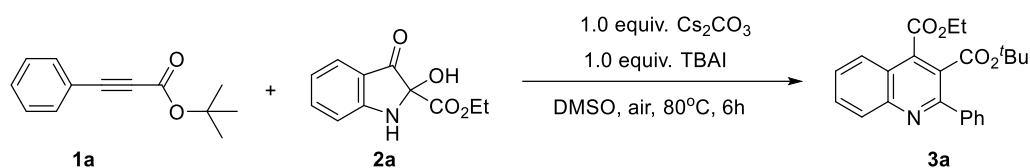

In a Schlenk tube, indolone **2a** (1.5 mmol, 1.4 equiv., 0.309 g), Cs<sub>2</sub>CO<sub>3</sub> (1.0 mmol, 0.326 g), TBAI (1.0 mmol, 0.369 g), DMSO (10 mL), and alkynoate **1a** (1.0 mmol, 0.202 g) were stirred at 80 °C in the oil bath for 6h under air. Then, the reaction mixture was cooled to room temperature and was treated with saturated NH<sub>4</sub>Cl, then extracted with EA and dried over anhydrous Na<sub>2</sub>SO<sub>4</sub>. After removal of the EA, the residue was purified by chromatography on basic silica gel (PE: EA = 10: 1) to afford **3a** (Light yellow solid, 0.1923 g, 51%).

## 6. Synthesis of 4a and 5a

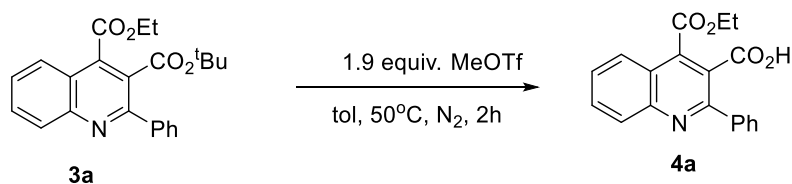

A solution of Quinoline **3a** (75.4 mg, 0.2 mmol) in 2 mL anhydrous toluene was added MeOTf (62 mg, 0.38 mmol, 1.9 equiv.) under N<sub>2</sub>. The resulting mixture was stirred in a preheated oil bath at 50 °C for 2 h. Then, Solvent was removed under in vacuo, the resultant residue was taken up in H<sub>2</sub>O, acidified to pH = 1 with 2M HCl, and extracted with EA (3 × 10 mL). The combined organic layers were washed with brine, dried (Na<sub>2</sub>SO<sub>4</sub>) and concentrated in vacuo of **4a** as a white solid (59.7 mg, 93%).

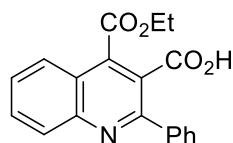

**4-(ethoxycarbonyl)-2-phenylquinoline-3-carboxylic acid (4a)**. m.p. 78-80 °C. <sup>1</sup>H NMR (500 MHz, d<sup>6</sup>-DMSO) δ. 8.17 (d, *J* = 8.0 Hz, 1H), 8.03 (d, *J* = 8.0 Hz, 1H), 7.94

(t,  $J = 7.5$  Hz, 1H), 7.77 (t,  $J = 7.5$  Hz, 1H), 7.72-7.70 (m, 2H), 7.54-7.49 (m, 3H), 4.48 (q,  $J = 7.2$  Hz, 2H), 1.36 (t,  $J = 7.0$  Hz, 3H).  $^{13}\text{C}$  NMR (125 MHz,  $\text{d}_6\text{-DMSO}$ )  $\delta$ . 168.2, 165.7, 155.8, 147.1, 139.4, 138.5, 131.8, 129.5, 129.1, 128.7, 128.5, 128.3, 125.2, 125.0, 121.3, 62.4, 13.7. HRMS (ESI) calcd for  $\text{C}_{19}\text{H}_{16}\text{NO}_4$ ,  $[\text{M}+\text{H}]^+$ : 322.1074, found: 322.1070.

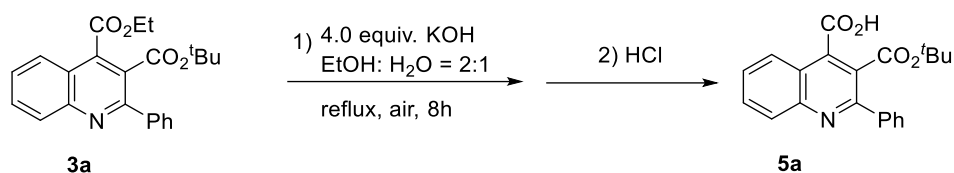

Quinoline **3a** (75.4 mg, 0.2 mmol) was dissolved in EtOH (1.0 mL),  $\text{H}_2\text{O}$  (0.5 mL), and KOH (44.9 mg, 0.8 mmol) and heated to reflux for 8 h. Solvent was removed under in vacuo, the resultant residue was taken up in  $\text{H}_2\text{O}$ , acidified to pH = 1 with 2M HCl, and extracted with EA ( $3 \times 10$  mL). The combined organic layers were washed with brine, dried ( $\text{Na}_2\text{SO}_4$ ) and concentrated in vacuo of **5a** as a white solid (63.5 mg, 91%).

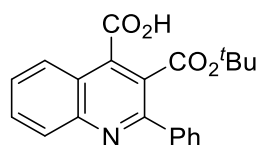

**3-(tert-butoxycarbonyl)-2-phenylquinoline-4-carboxylic acid (5a)**. m.p. 187-189  $^\circ\text{C}$ .  $^1\text{H}$  NMR (500 MHz,  $\text{d}_6\text{-DMSO}$ )  $\delta$ . 8.14 (d,  $J = 8.5$  Hz, 1H), 8.08 (d,  $J = 8.5$  Hz, 1H), 7.93 (t,  $J = 7.5$  Hz, 1H), 7.78 (t,  $J = 7.8$  Hz, 1H), 7.63-7.62 (m, 2H), 7.53-7.51 (m, 2H), 1.34 (s, 9H).  $^{13}\text{C}$  NMR (125 MHz,  $\text{d}_6\text{-DMSO}$ )  $\delta$ . 167.2, 165.6, 156.2, 147.2, 140.5, 139.6, 131.6, 129.4, 128.9, 128.5, 128.4, 128.2, 125.4, 124.4, 121.3, 82.7, 27.1. HRMS (ESI) calcd for  $\text{C}_{21}\text{H}_{20}\text{NO}_4$ ,  $[\text{M}+\text{H}]^+$ : 350.1387, found: 350.1394.

## 7. Mechanistic Experiments

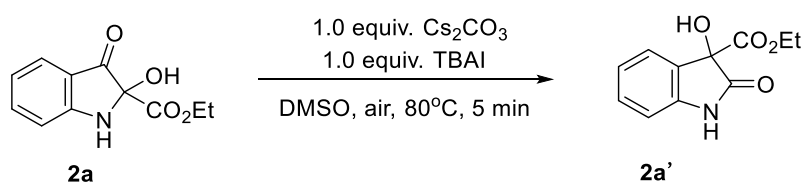

In a Schlenk tube, indolone **2a** (0.2 mmol, 44.2 mg), Cs<sub>2</sub>CO<sub>3</sub> (0.2 mmol, 65.2 mg), TBAI (0.2 mmol, 73.9 mg), DMSO (2.0 mL) were stirred at 80 °C in the oil bath for 5 min. Then, the reaction mixture was cooled to room temperature and was treated with saturated NH<sub>4</sub>Cl, then extracted with EA and dried over anhydrous Na<sub>2</sub>SO<sub>4</sub>. After removal of the EA, the residue was purified by chromatography on basic silica gel (PE: EA = 1: 1) to afford **2a'** (white solid, 34.9 mg, 79%).

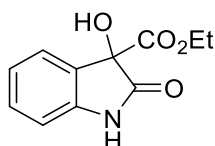

*ethyl 3-hydroxy-2-oxoindoline-3-carboxylate (2a')*. m.p. 151-153 °C. <sup>1</sup>H NMR (500 MHz, d<sup>6</sup>-DMSO) δ. 10.57 (s, 1H), 7.27 (t, *J* = 7.5 Hz, 1H), 7.20 (d, *J* = 7.5 Hz, 1H), 7.00 (s, 1H), 6.97 (t, *J* = 7.5 Hz, 1H), 6.86 (d, *J* = 7.5 Hz, 1H), 4.14-4.01 (m, 2H), 1.05 (t, *J* = 7.2 Hz, 3H). <sup>13</sup>C NMR (125 MHz, d<sub>6</sub>-DMSO) δ. 174.7, 169.3, 142.8, 130.2, 129.2, 123.8, 122.1, 110.1, 77.6, 61.3, 13.9. HRMS (ESI) calcd for C<sub>11</sub>H<sub>11</sub>NaNO<sub>4</sub>, [M+Na]<sup>+</sup>: 244.0580, found: 244.0583.

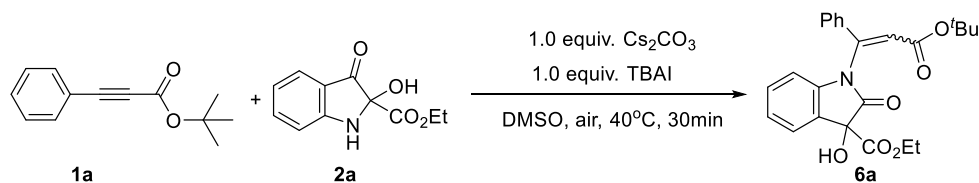

In a Schlenk tube, indolone **2a** (0.28 mmol, 1.4 equiv., 61.9 mg), Cs<sub>2</sub>CO<sub>3</sub> (0.2 mmol, 65.2 mg), TBAI (0.2 mmol, 73.8 mg), DMSO (2.0 mL), and alkynoate **1a** (0.2 mmol, 40.4 mg) were stirred at 40 °C in the oil bath for 40 min under air. Then, the reaction mixture was cooled to room temperature and was treated with saturated NH<sub>4</sub>Cl, then extracted with EA and dried over anhydrous Na<sub>2</sub>SO<sub>4</sub>. After removal of the EA, the residue was purified by chromatography on basic silica gel (PE: EA = 2: 1) to afford **6a** (white solid, 16.9 mg, 20%).

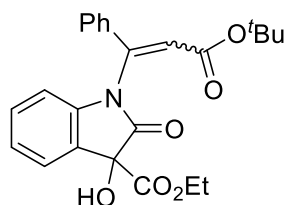

*ethyl 1-(3-(tert-butoxy)-3-oxo-1-phenylprop-1-en-1-yl)-3-hydroxy-2-oxoindoline-3-carboxylate (6a)*. m.p. 133-135 °C. <sup>1</sup>H NMR (500 MHz, d<sup>6</sup>-DMSO) δ. 7.68 (d, *J* = 7.5 Hz, 2H), 7.52 (s, 1H), 7.48-7.42 (m, 3H), 7.37 (d, *J* = 7.5 Hz, 1H), 7.23 (t, *J* = 7.5 Hz, 1H), 7.07 (t, *J* = 7.8 Hz, 1H), 6.71 (s, 1H), 6.44 (d, *J* = 7.5 Hz, 1H), 4.26-4.11 (m, 2H), 1.23 (s, 9H), 1.15 (t, *J* = 7.2 Hz, 3H). <sup>13</sup>C NMR (125 MHz, d<sub>6</sub>-DMSO) δ. 171.8, 169.4, 162.9, 143.3, 140.1, 133.4, 130.7, 130.2, 129.0, 127.7, 126.5, 123.9, 123.2, 120.2, 110.4, 80.8, 77.7, 62.0, 27.3, 13.9. HRMS (ESI) calcd for C<sub>24</sub>H<sub>25</sub>NaNO<sub>6</sub>, [M+Na]<sup>+</sup>: 446.1574, found: 446.1579.

## 8. References

- [1] Park, K.; You, J.; Jeon, S.; Lee, S. *Eur. J. Org. Chem.* **2013**, *10*, 1973-1978.
- [2] Vercruyse, S.; Cornelissen, L.; Nahra, F.; Collard, L.; Riant, O. *Chemistry*. **2014**, *20*, 1834-1838.
- [3] Rooke, D. A.; Ferreira, E. M. *Angew. Chem., Int. Ed.* **2012**, *51*, 3225-3230.

## 9. Copies of spectra of new products

$^1\text{H}$  NMR (500 MHz,  $\text{CDCl}_3$ )

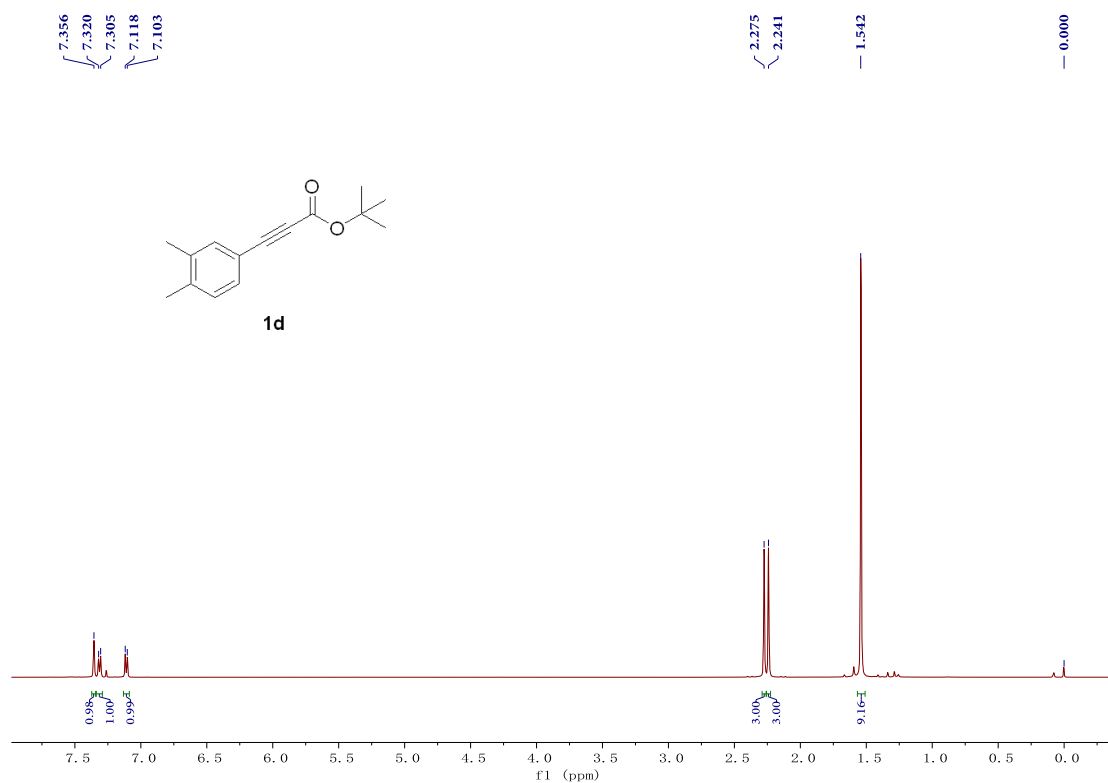

$^{13}\text{C}$  NMR (125 MHz,  $\text{CDCl}_3$ )

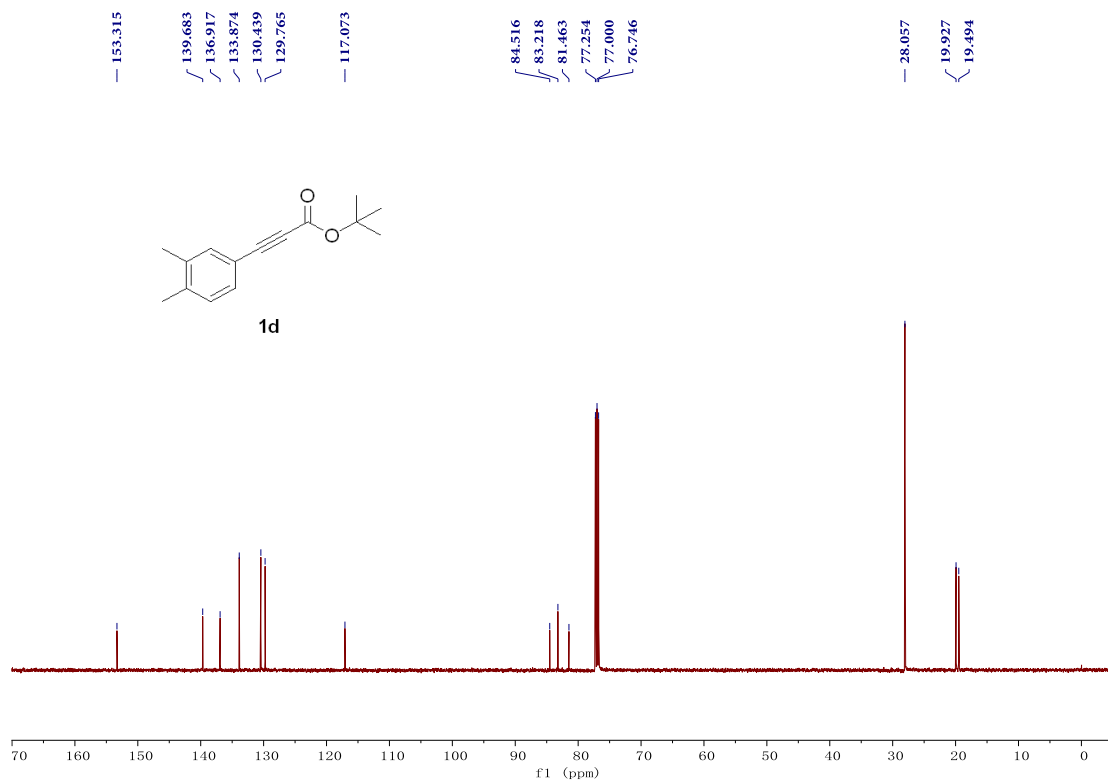

<sup>1</sup>H NMR (500 MHz, CDCl<sub>3</sub>)

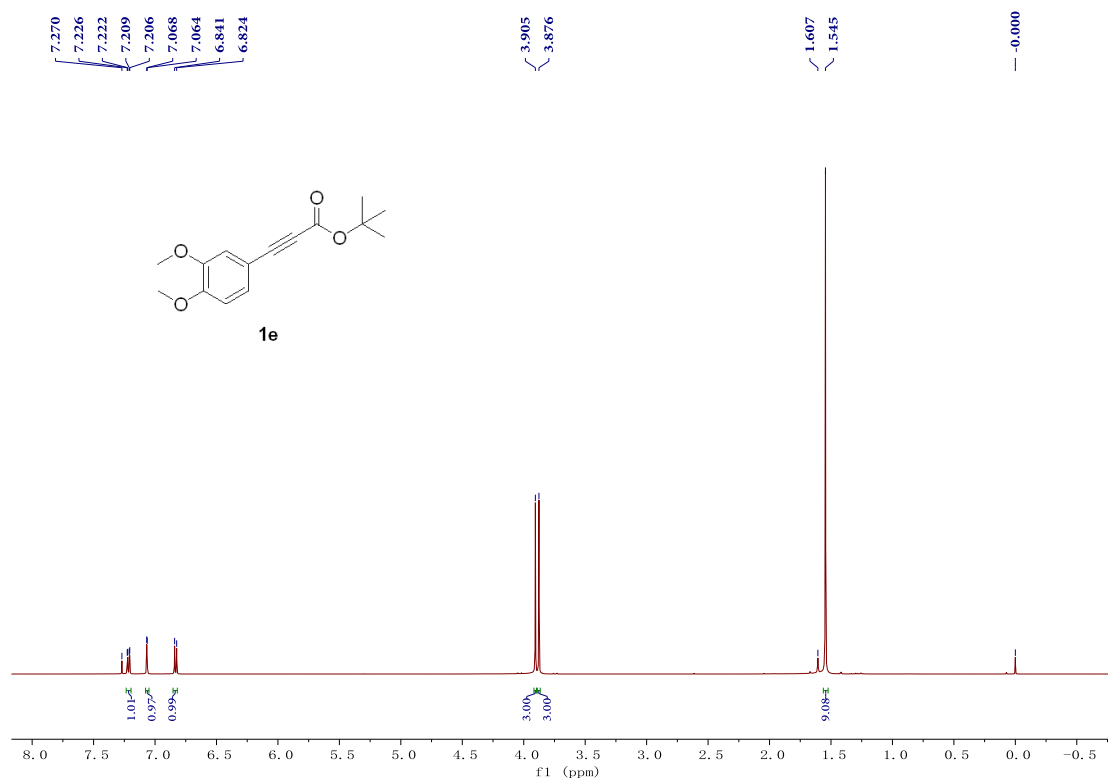

<sup>13</sup>C NMR (125 MHz, CDCl<sub>3</sub>)

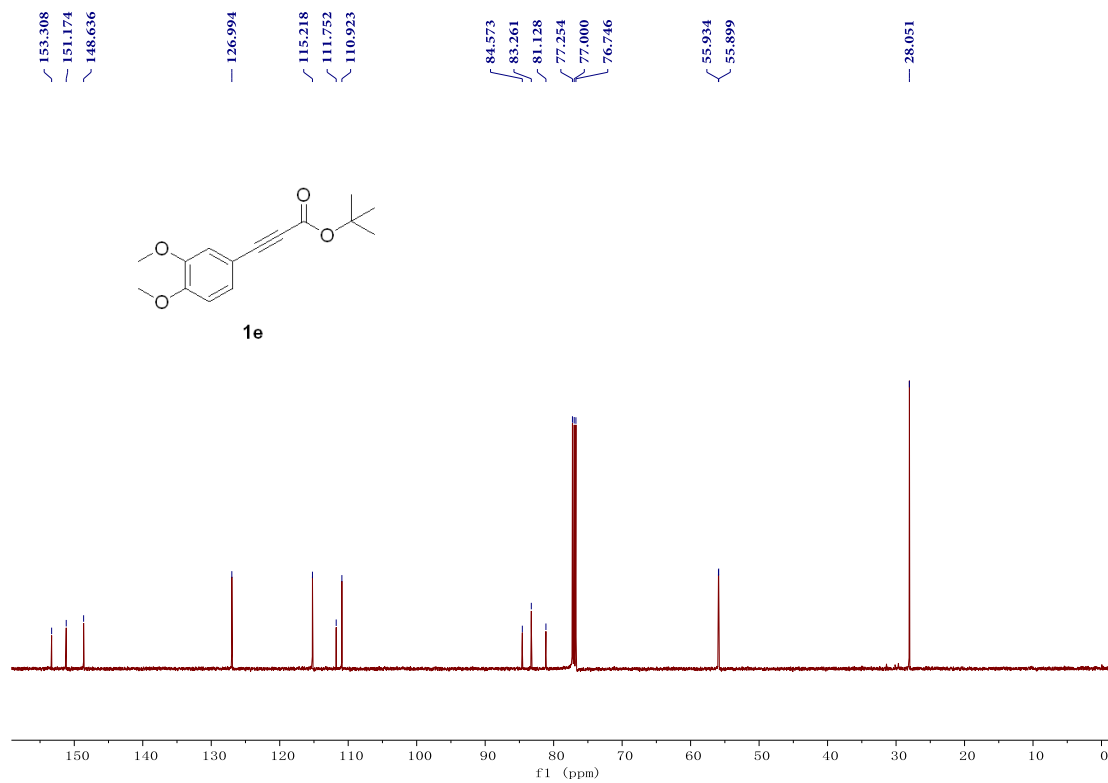



$^1\text{H}$  NMR (500 MHz,  $\text{CDCl}_3$ )

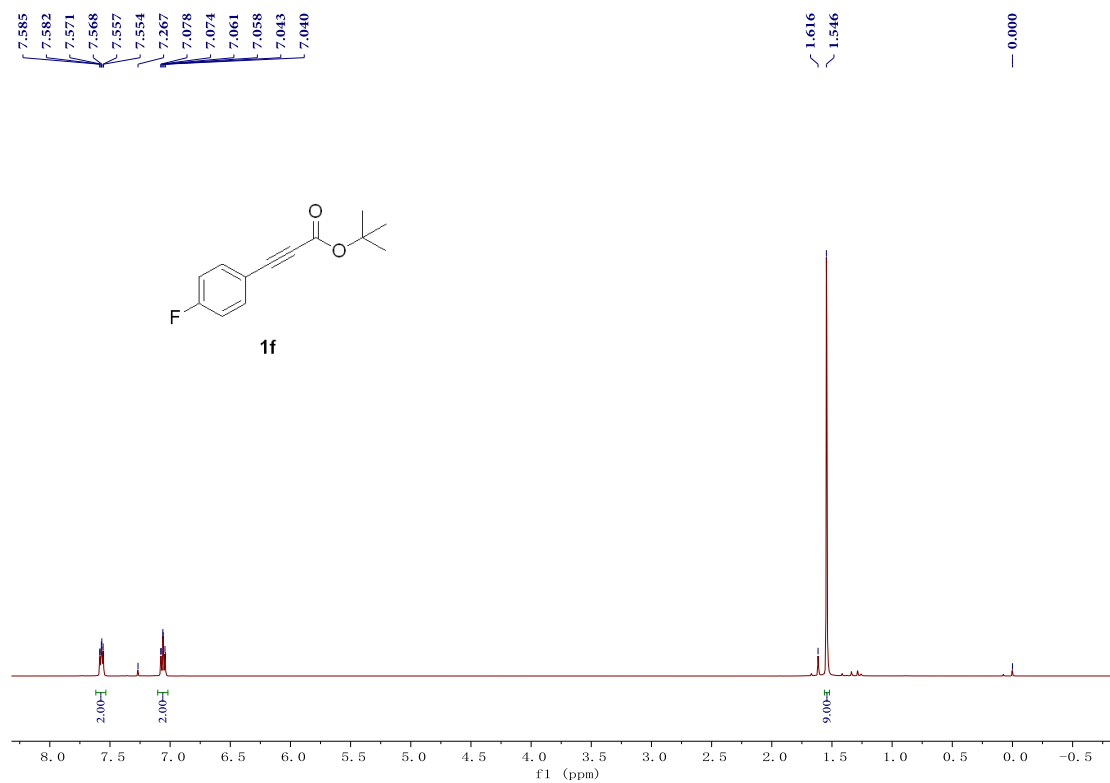

$^{13}\text{C}$  NMR (125 MHz,  $\text{CDCl}_3$ )

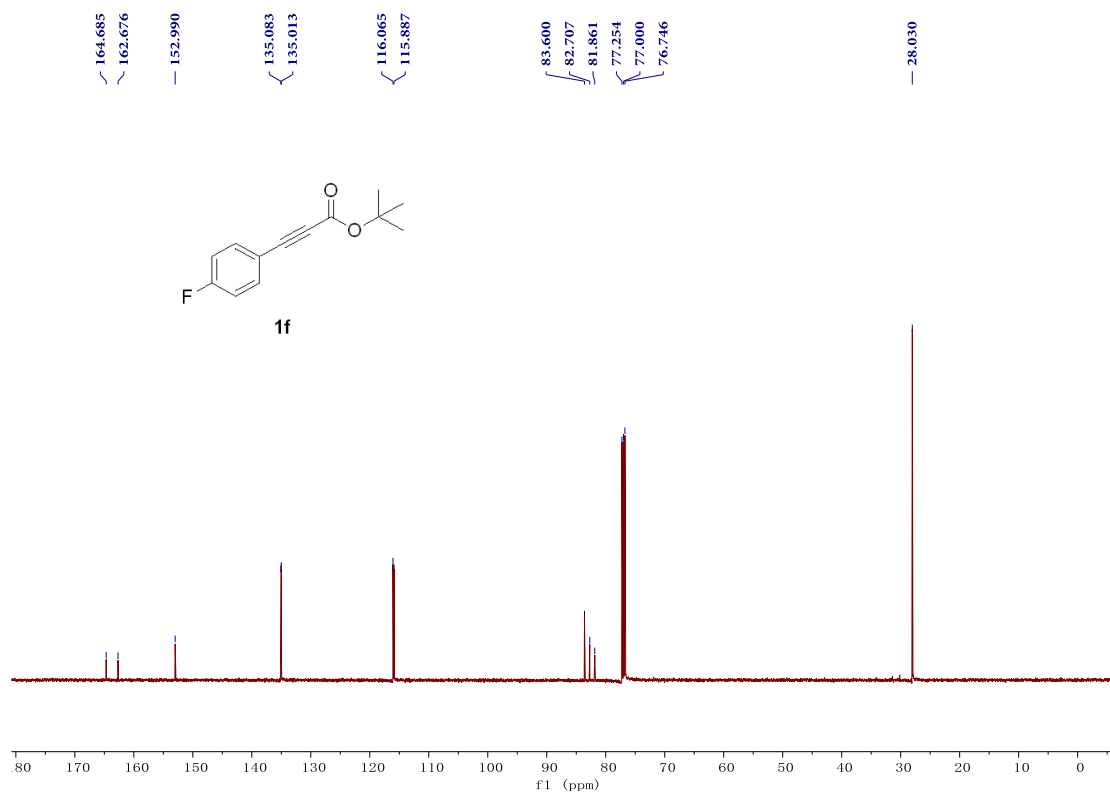

$^1\text{H}$  NMR (500 MHz,  $\text{CDCl}_3$ )

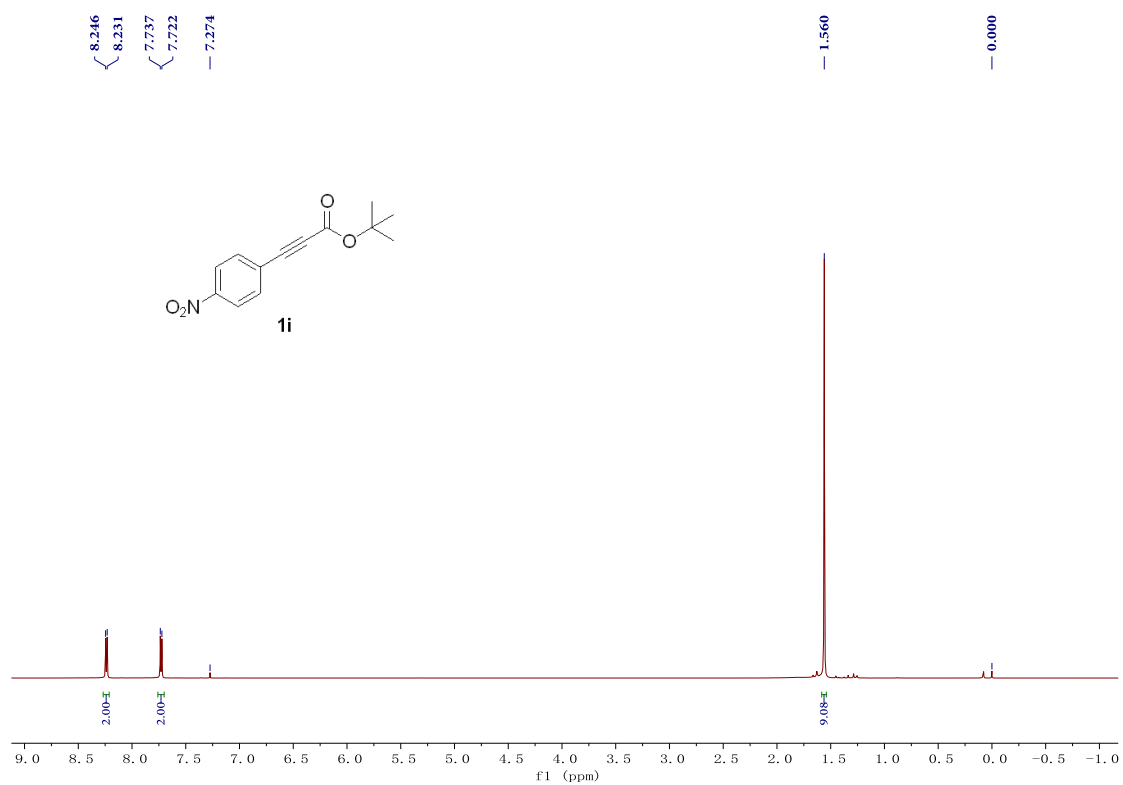

$^{13}\text{C}$  NMR (125 MHz,  $\text{CDCl}_3$ )

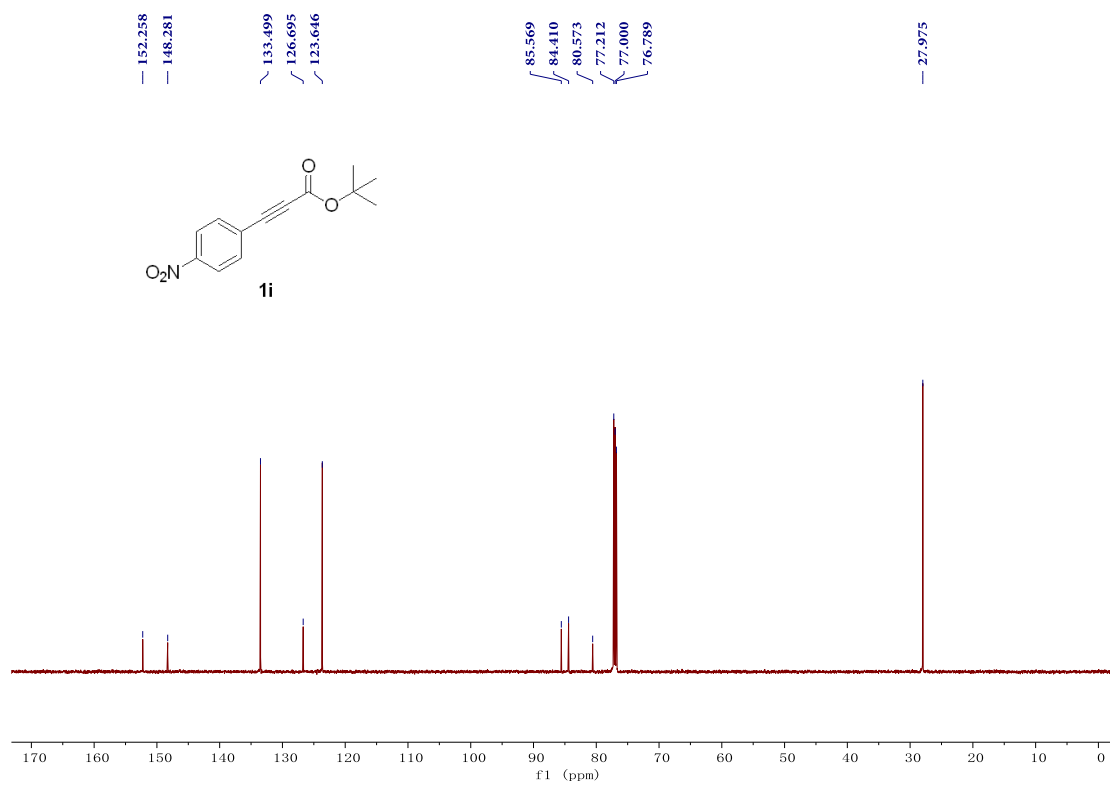

$^1\text{H}$  NMR (500 MHz,  $\text{CDCl}_3$ )

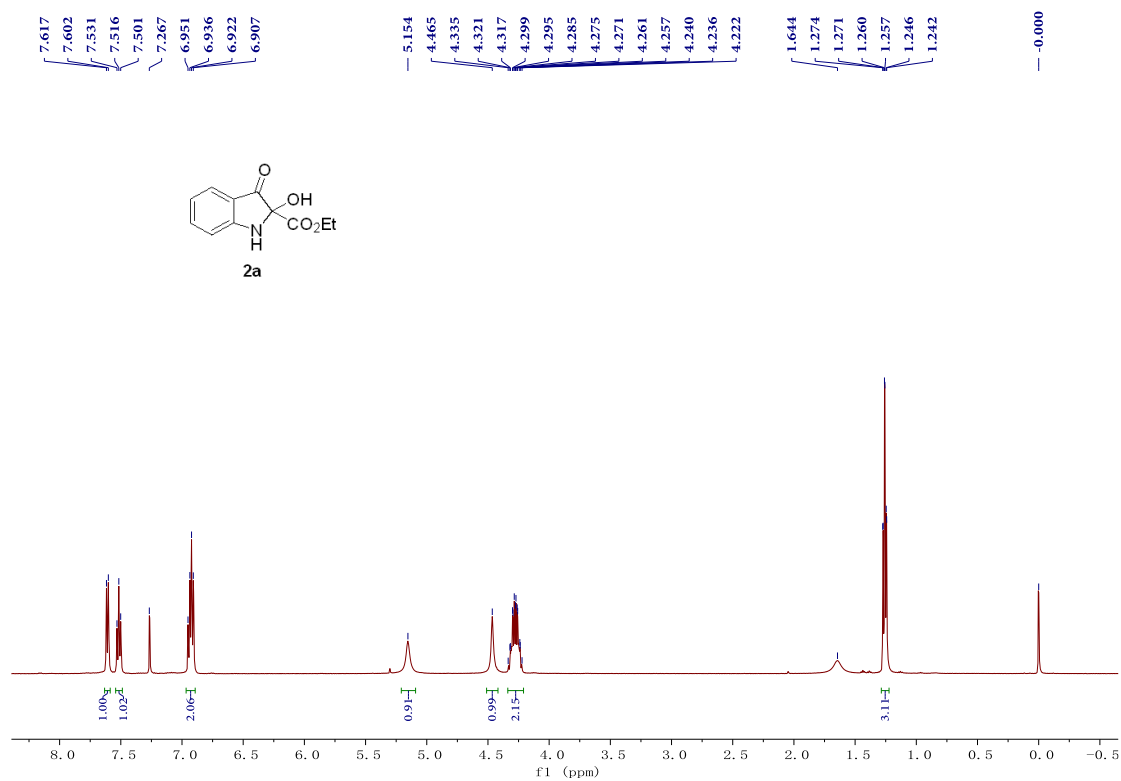

$^{13}\text{C}$  NMR (125 MHz,  $\text{CDCl}_3$ )

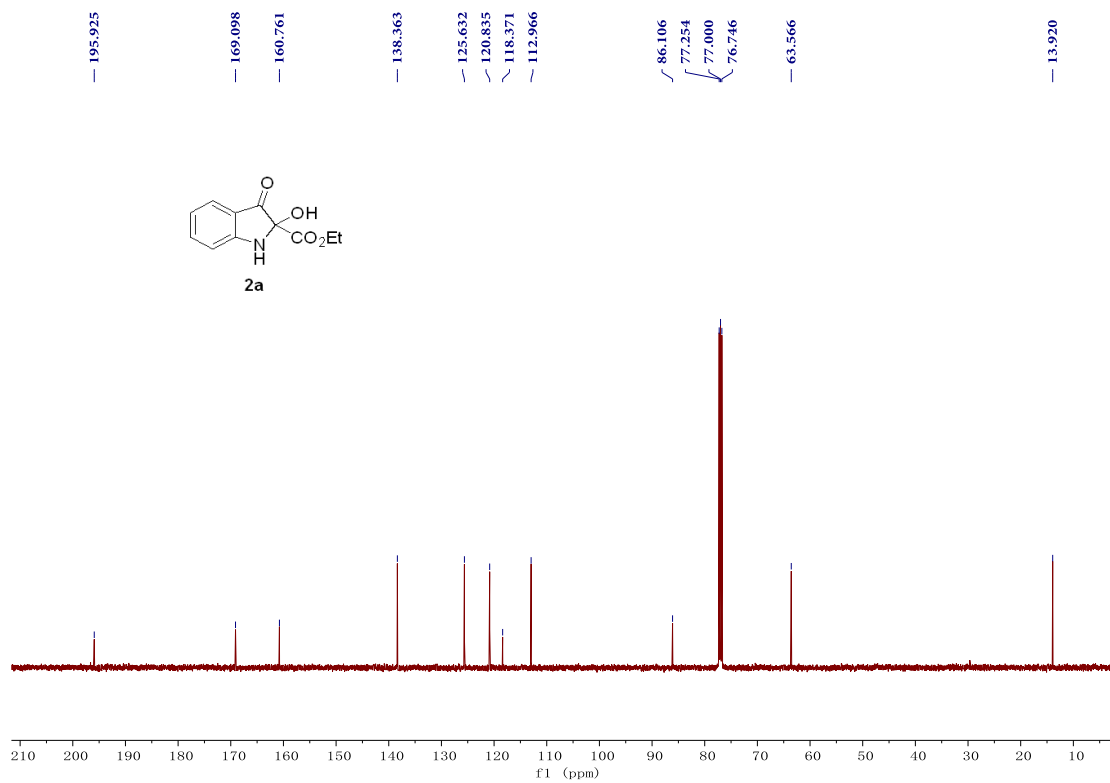

$^1\text{H}$  NMR (500 MHz,  $\text{CDCl}_3$ )

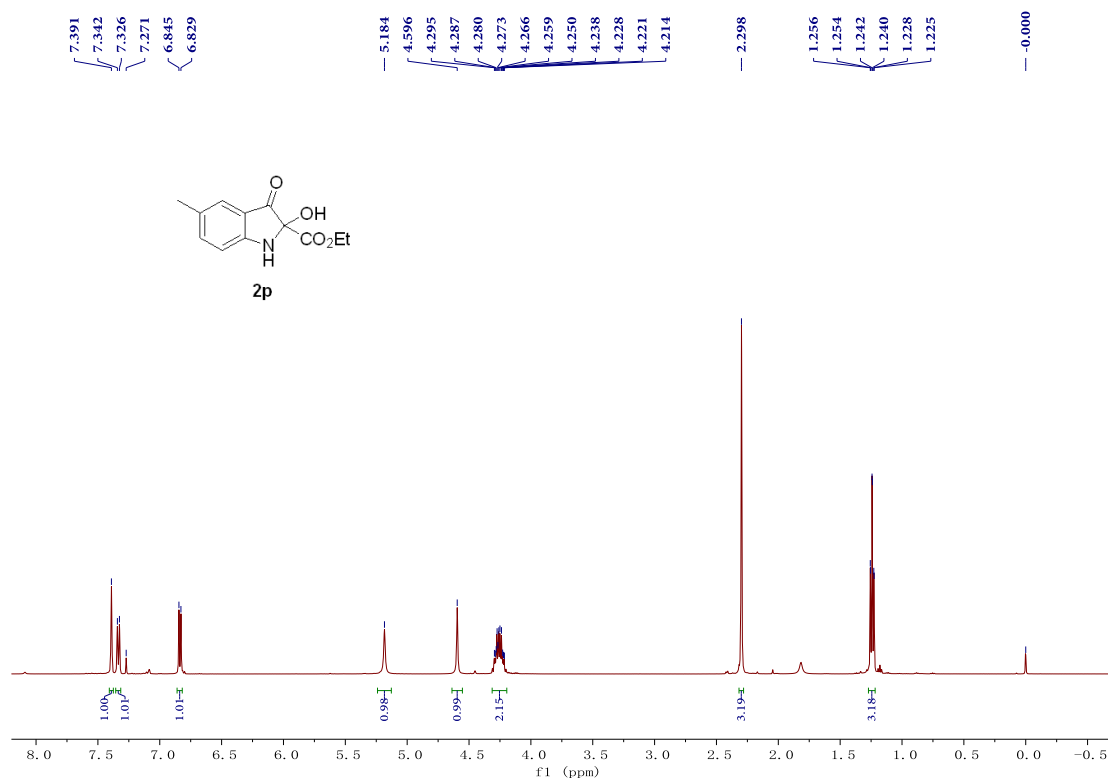

$^{13}\text{C}$  NMR (125 MHz,  $\text{CDCl}_3$ )

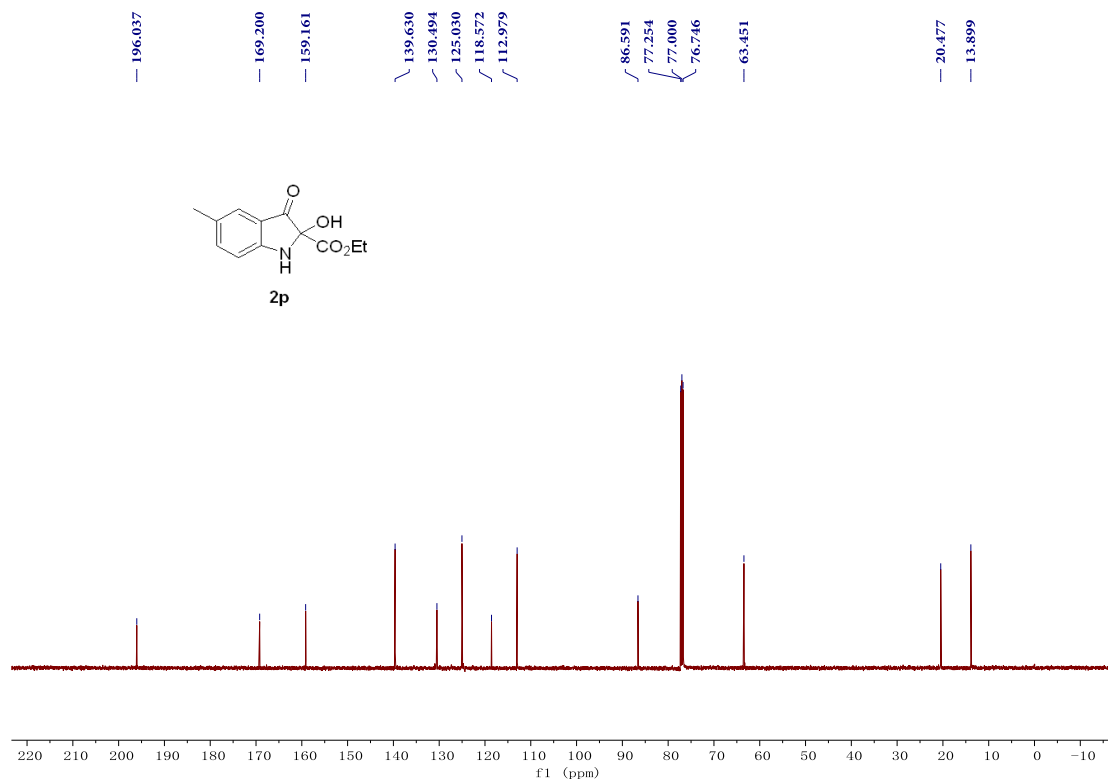

$^1\text{H}$  NMR (500 MHz,  $\text{CDCl}_3$ )

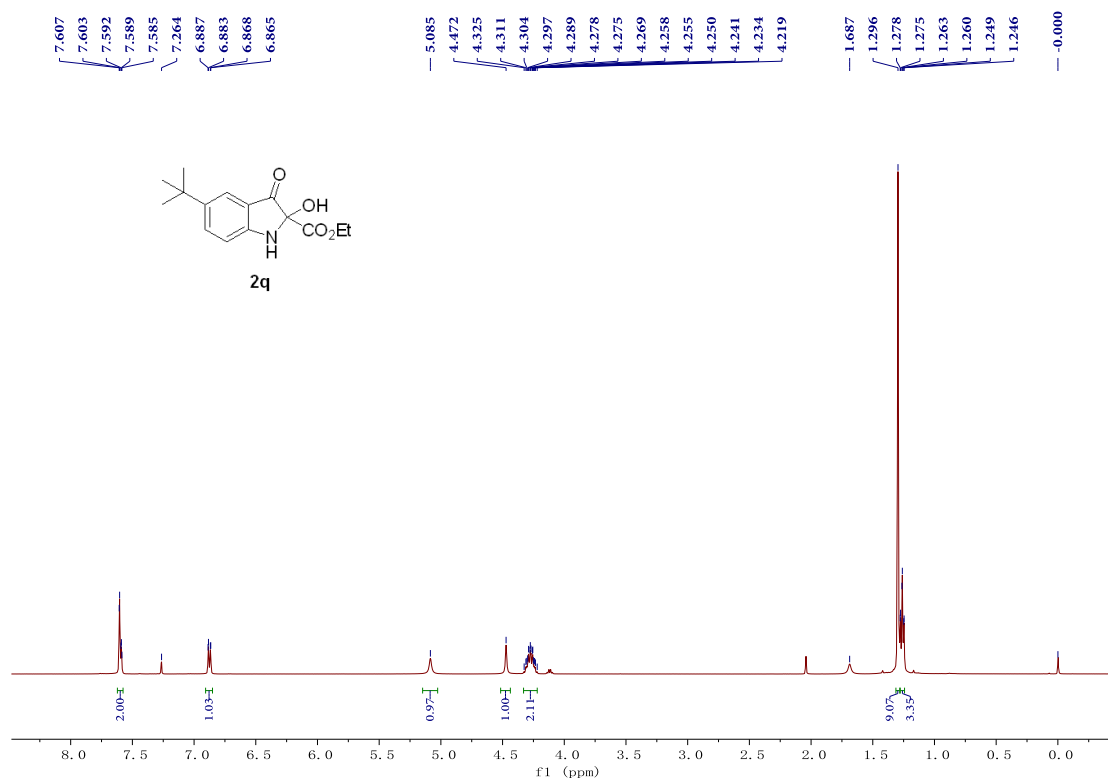

$^{13}\text{C}$  NMR (125 MHz,  $\text{CDCl}_3$ )

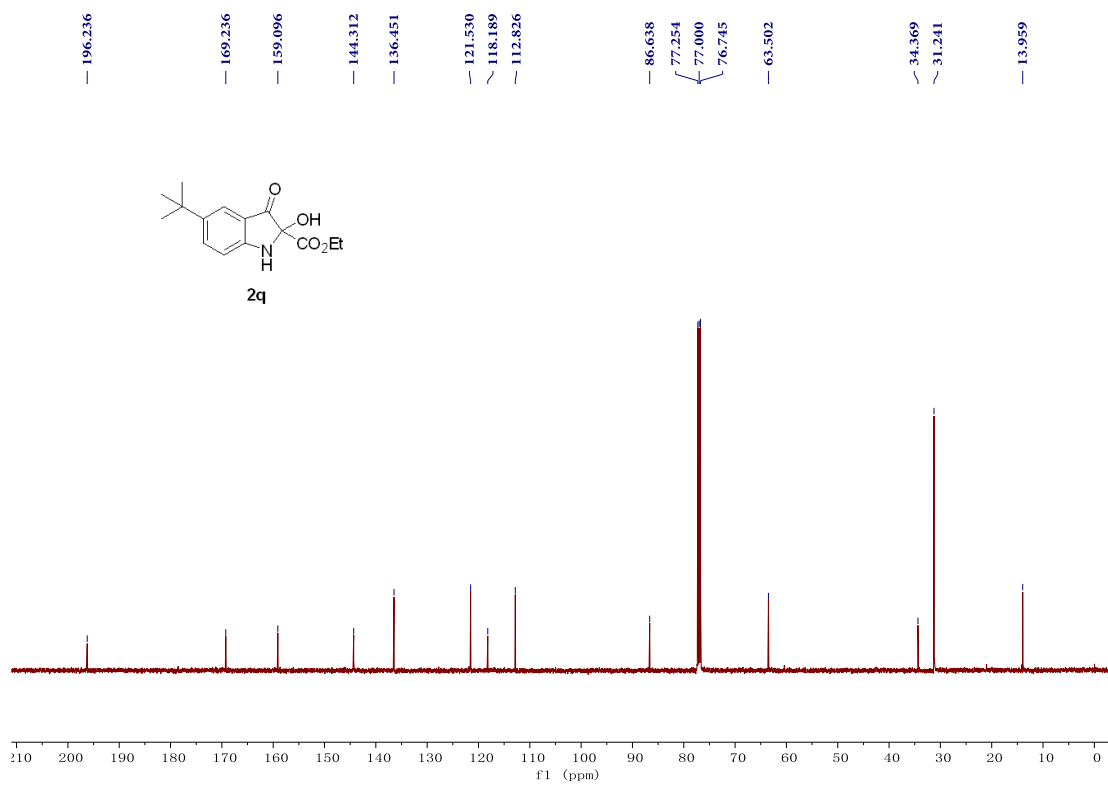

$^1\text{H}$  NMR (500 MHz,  $\text{d}^6\text{-DMSO}$ )

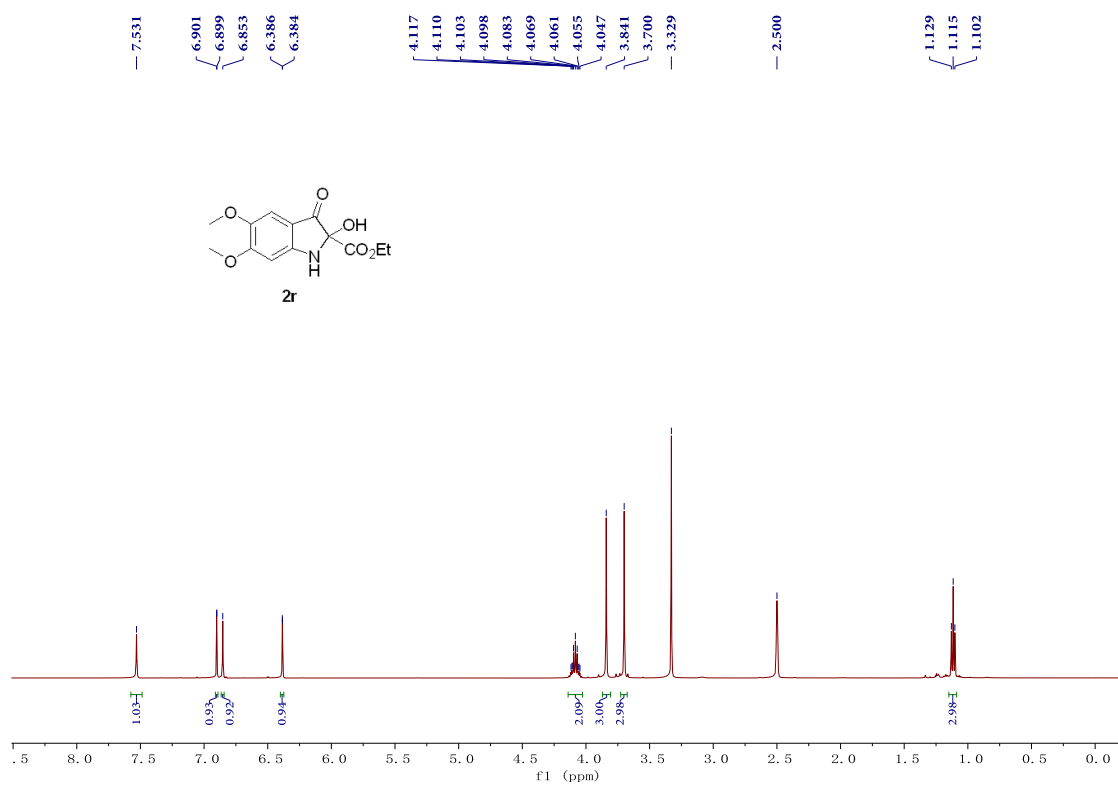

$^{13}\text{C}$  NMR (125 MHz,  $\text{d}^6\text{-DMSO}$ )

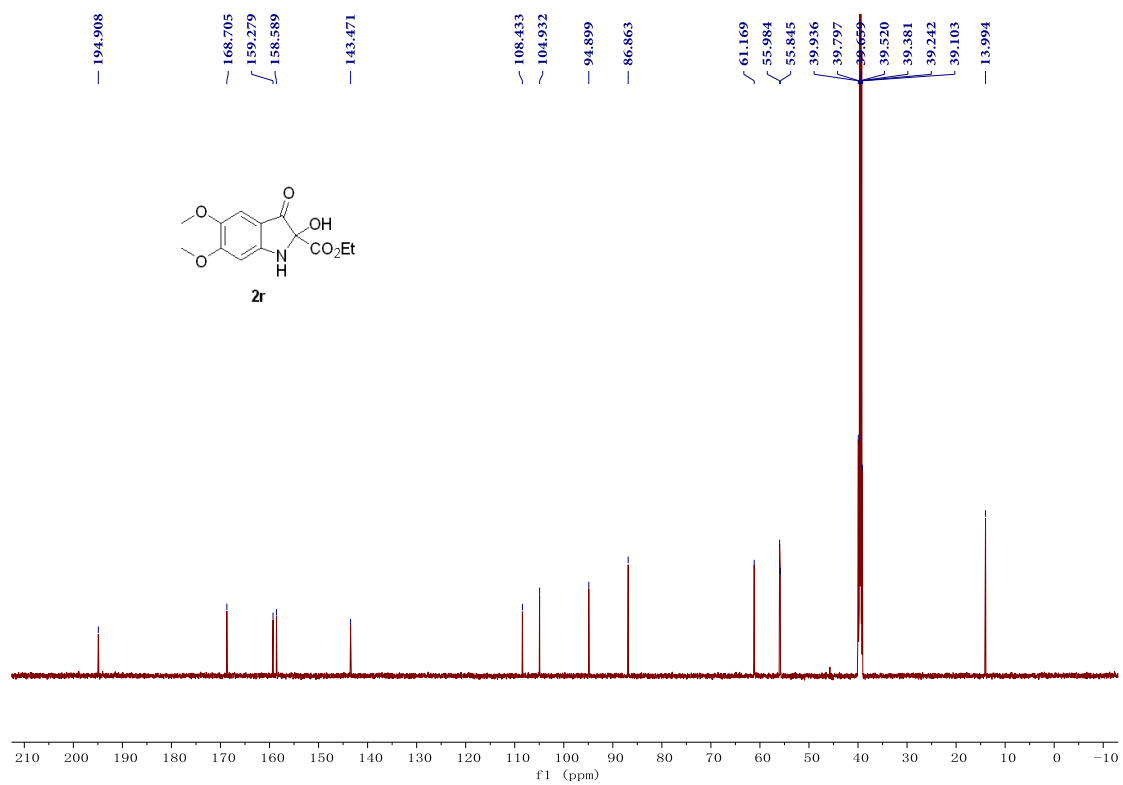

$^1\text{H}$  NMR (500 MHz,  $\text{CDCl}_3$ )

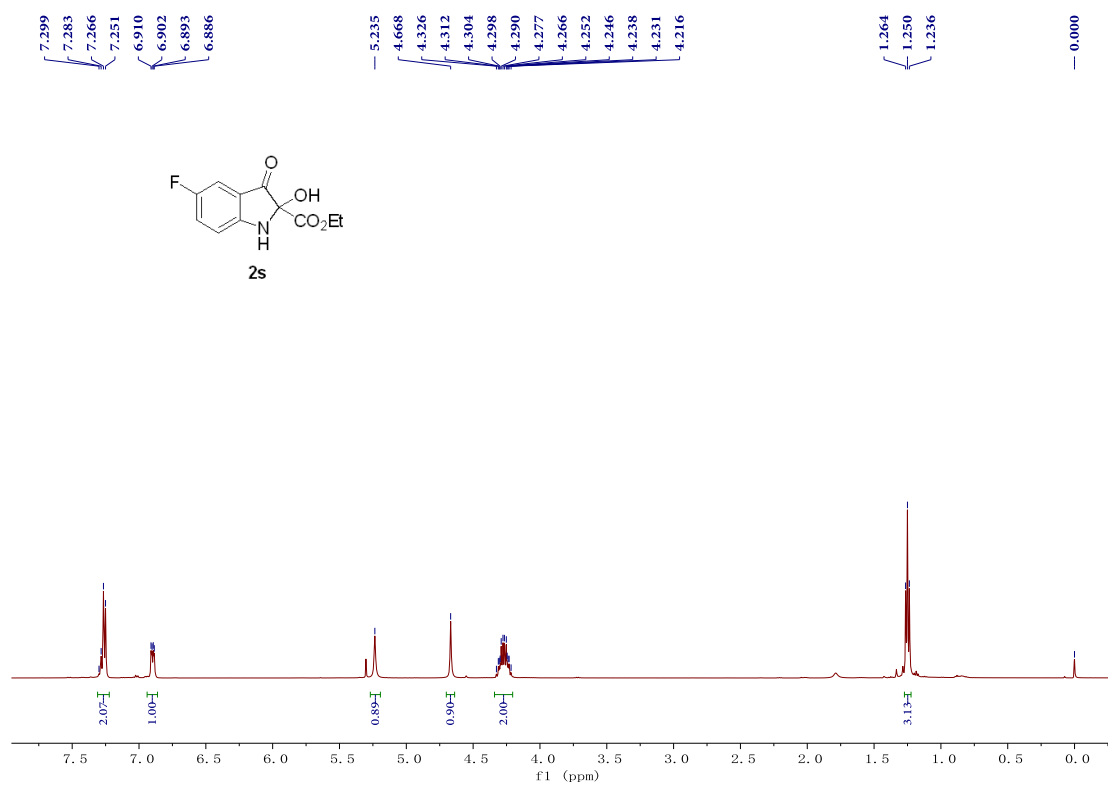

$^{13}\text{C}$  NMR (125 MHz,  $\text{CDCl}_3$ )

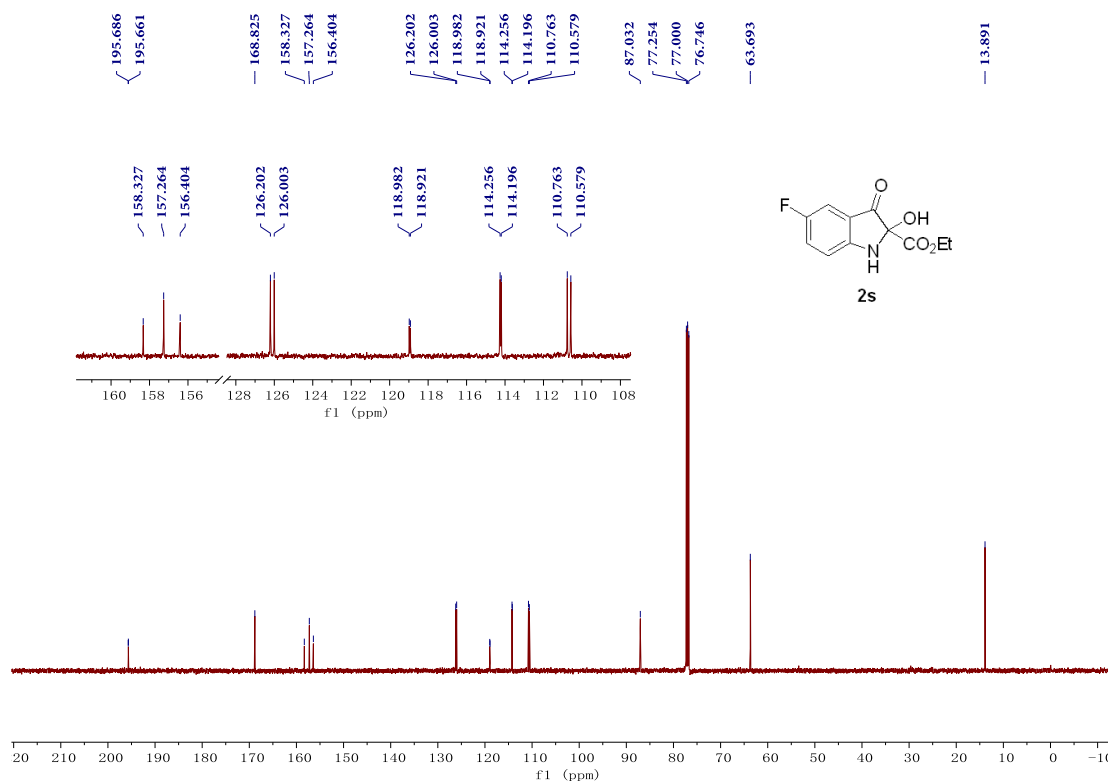

$^1\text{H}$  NMR (500 MHz,  $\text{CDCl}_3$ )

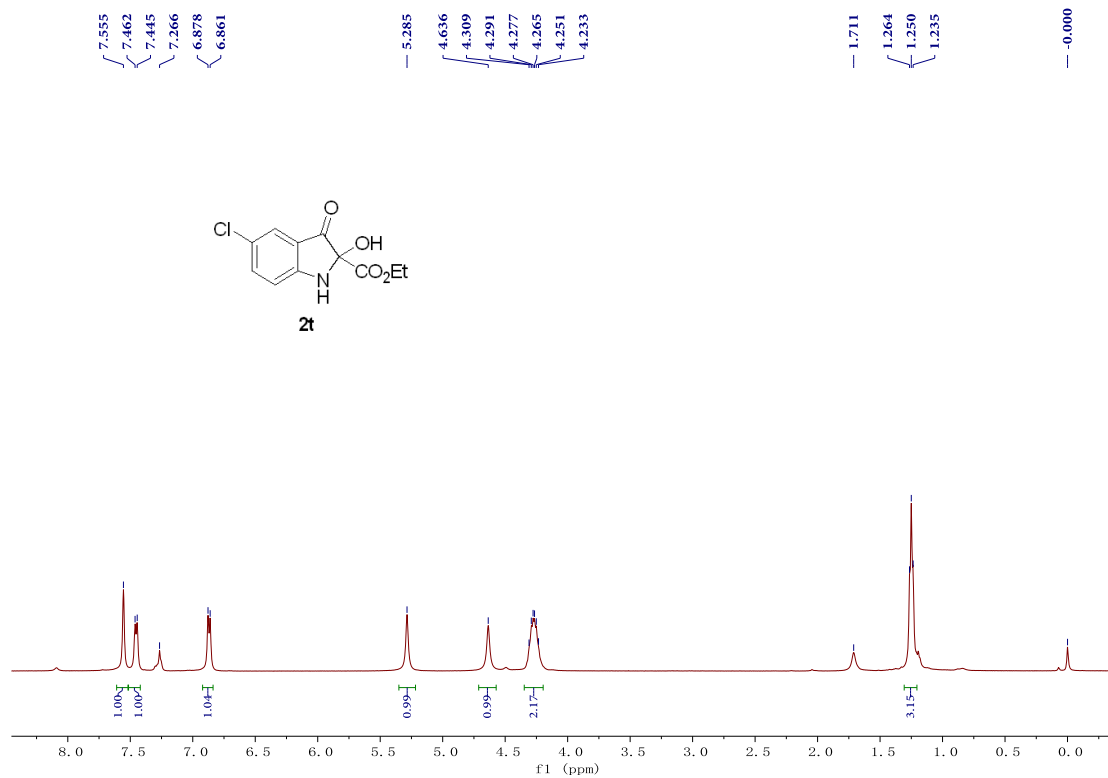

$^{13}\text{C}$  NMR (125 MHz,  $\text{CDCl}_3$ )

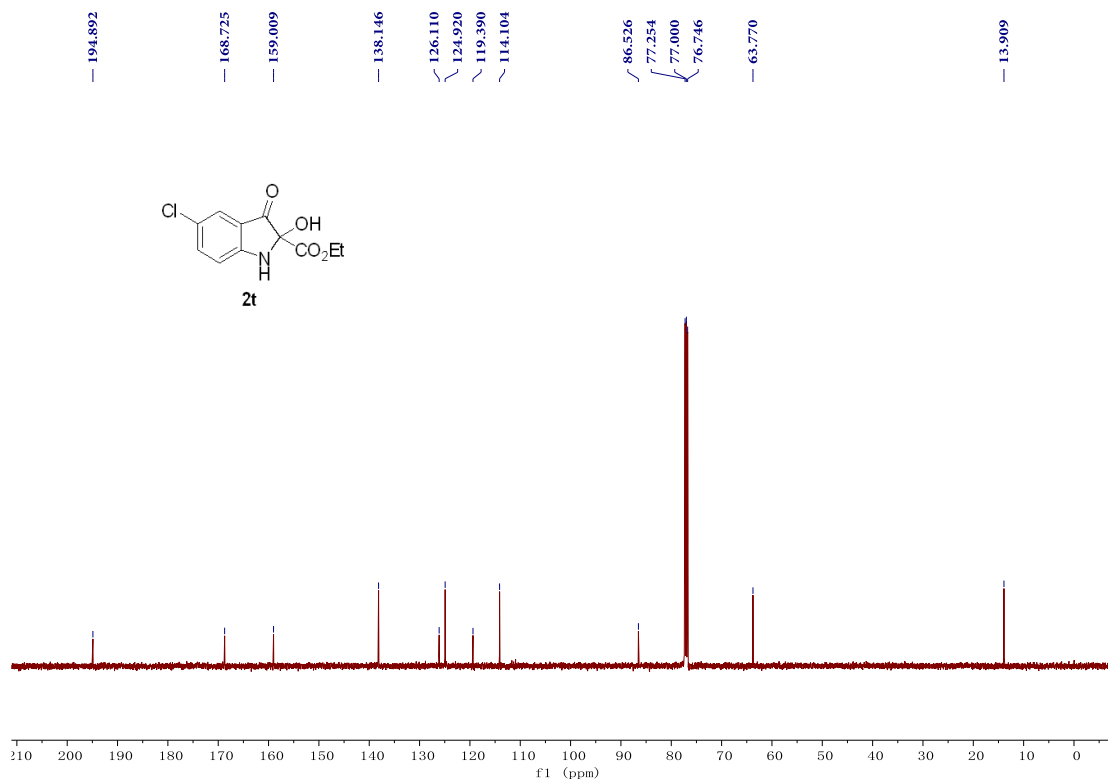



# <sup>1</sup>H NMR (600 MHz, CDCl<sub>3</sub>)

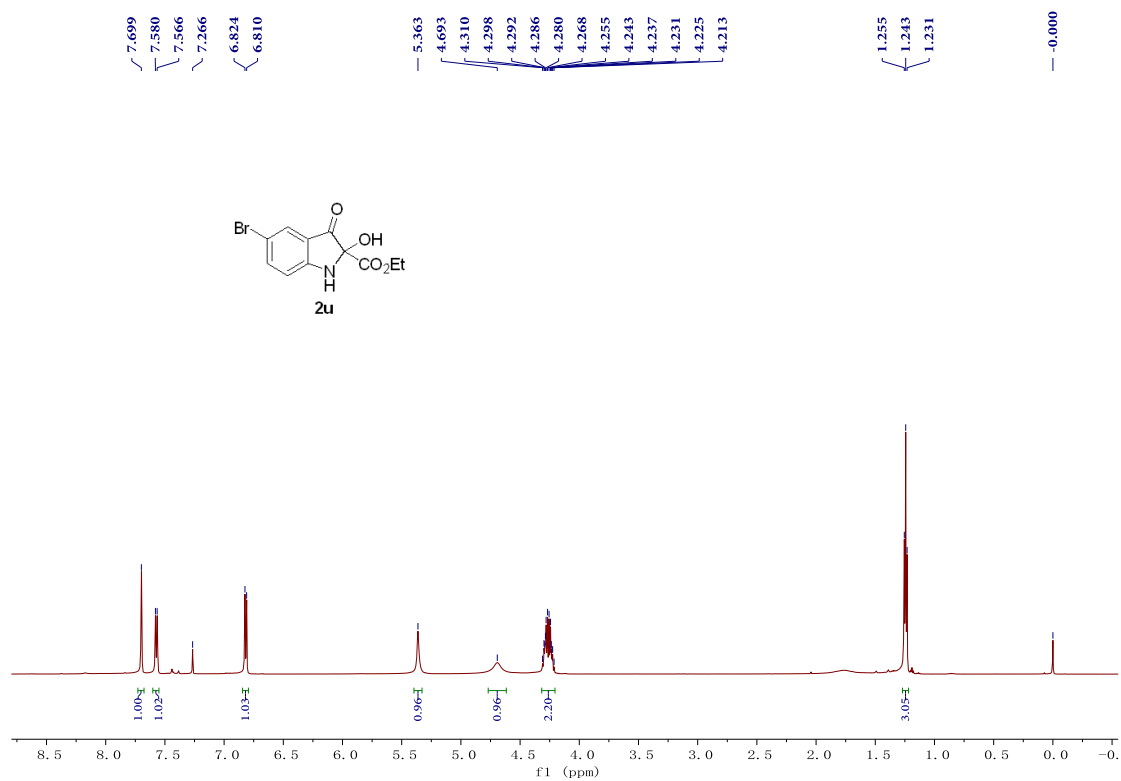

# <sup>13</sup>C NMR (150 MHz, CDCl<sub>3</sub>)

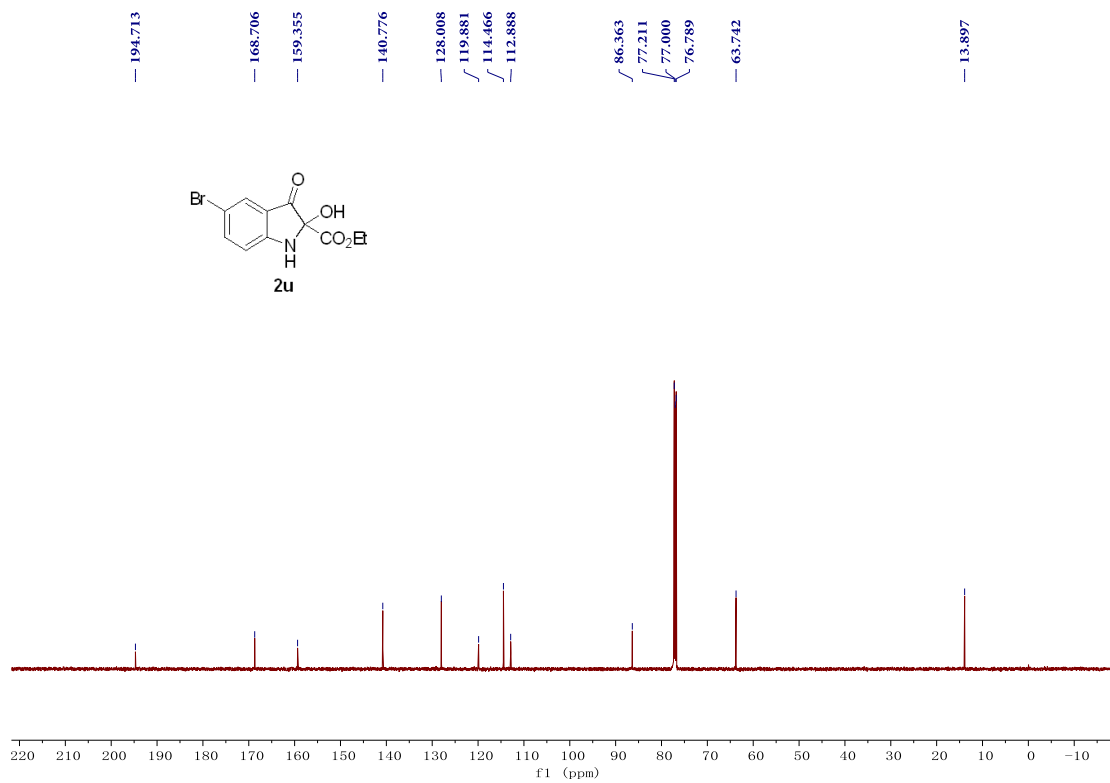

$^1\text{H}$  NMR (600 MHz,  $\text{CDCl}_3$ )

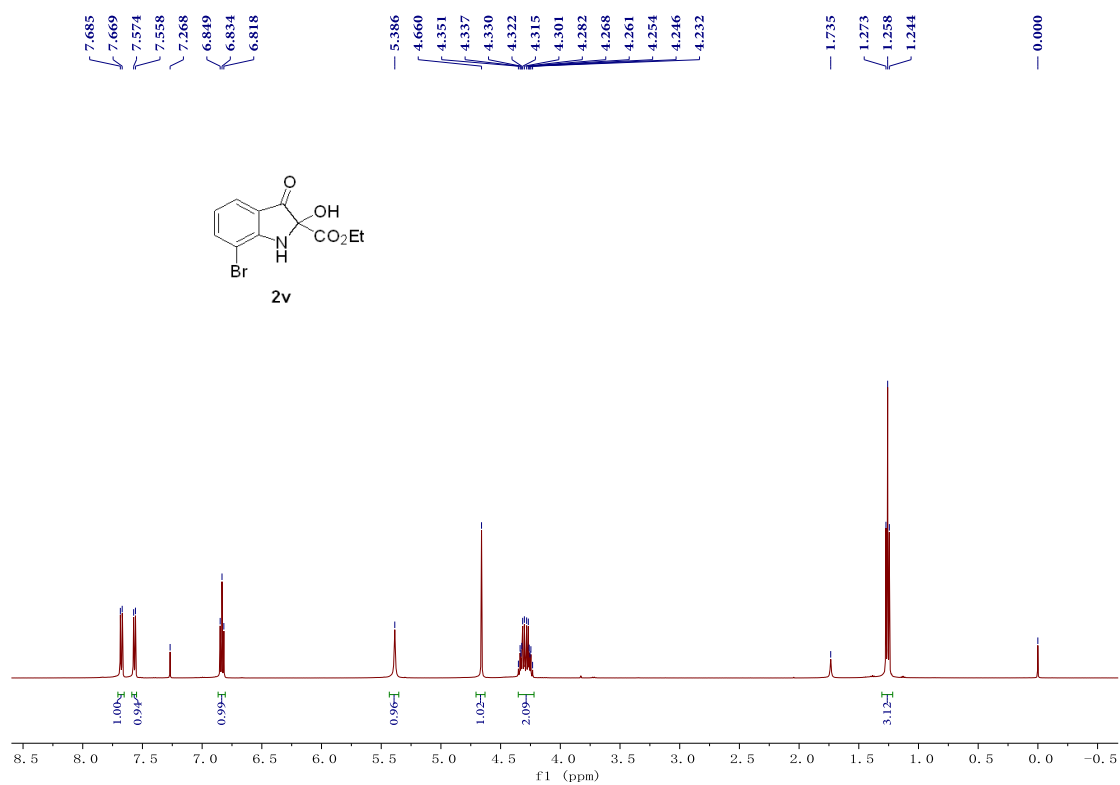

$^{13}\text{C}$  NMR (150 MHz,  $\text{CDCl}_3$ )

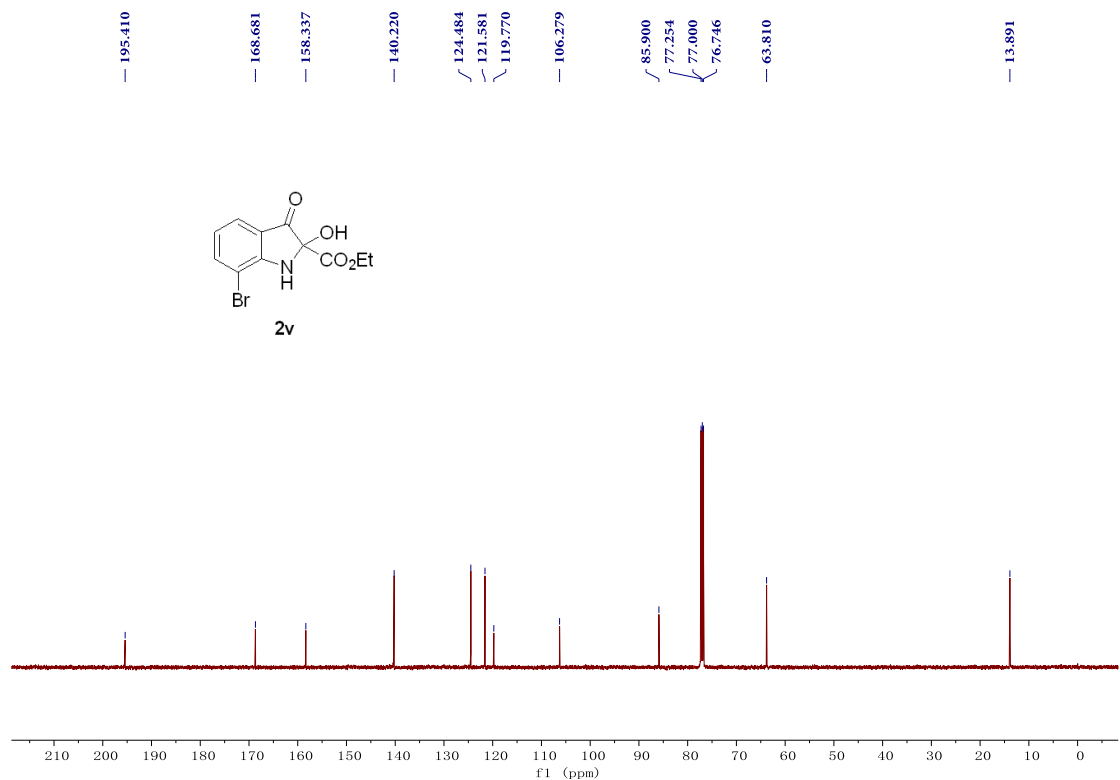

<sup>1</sup>H NMR (500 MHz, CDCl<sub>3</sub>)

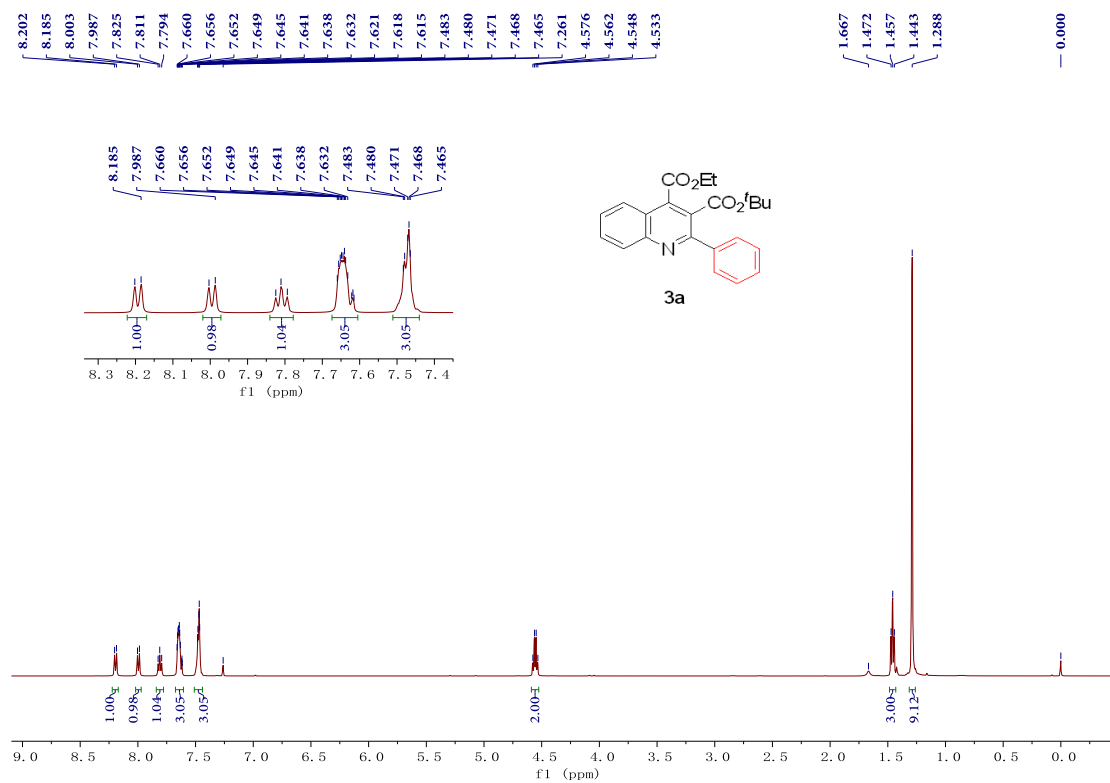

<sup>13</sup>C NMR (125 MHz, CDCl<sub>3</sub>)

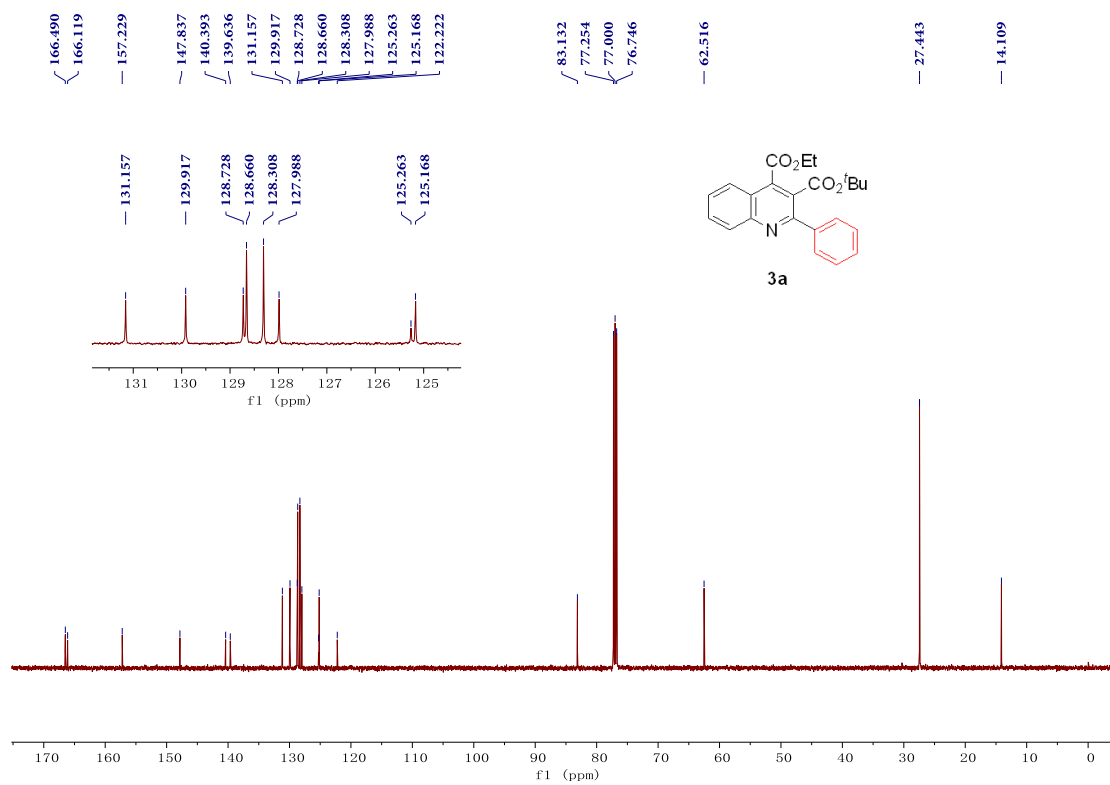

<sup>1</sup>H NMR (500 MHz, CDCl<sub>3</sub>)

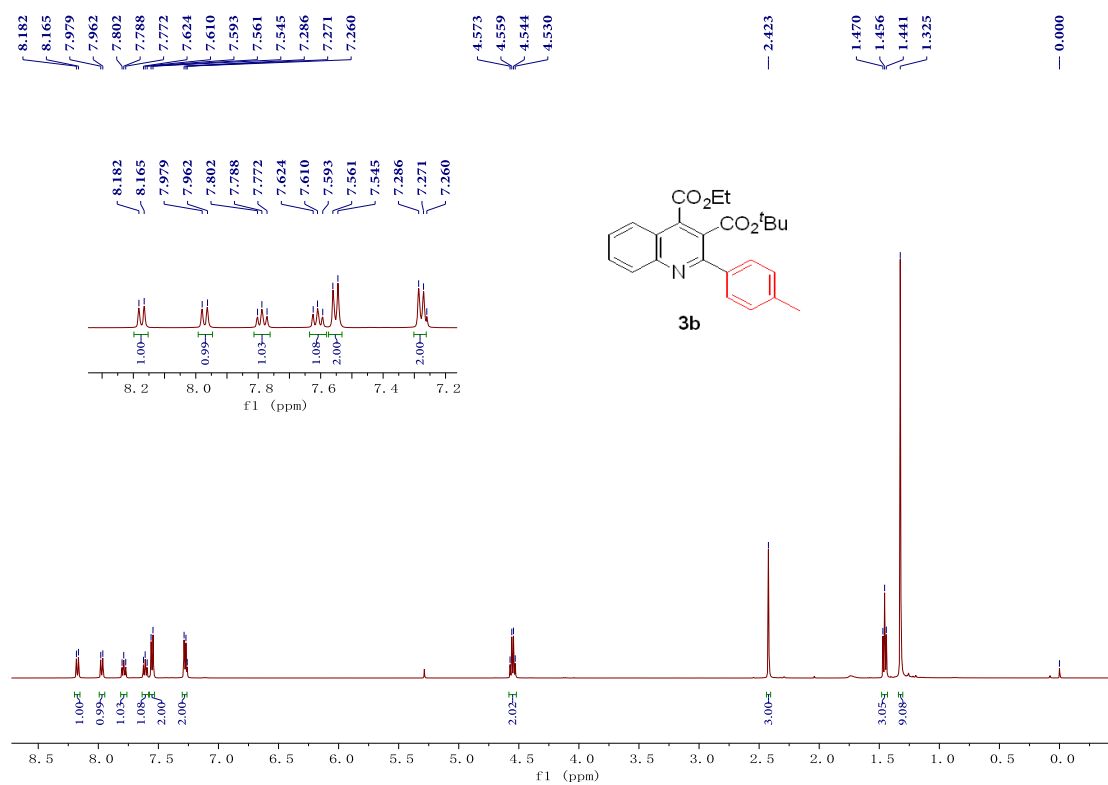

<sup>13</sup>C NMR (125 MHz, CDCl<sub>3</sub>)

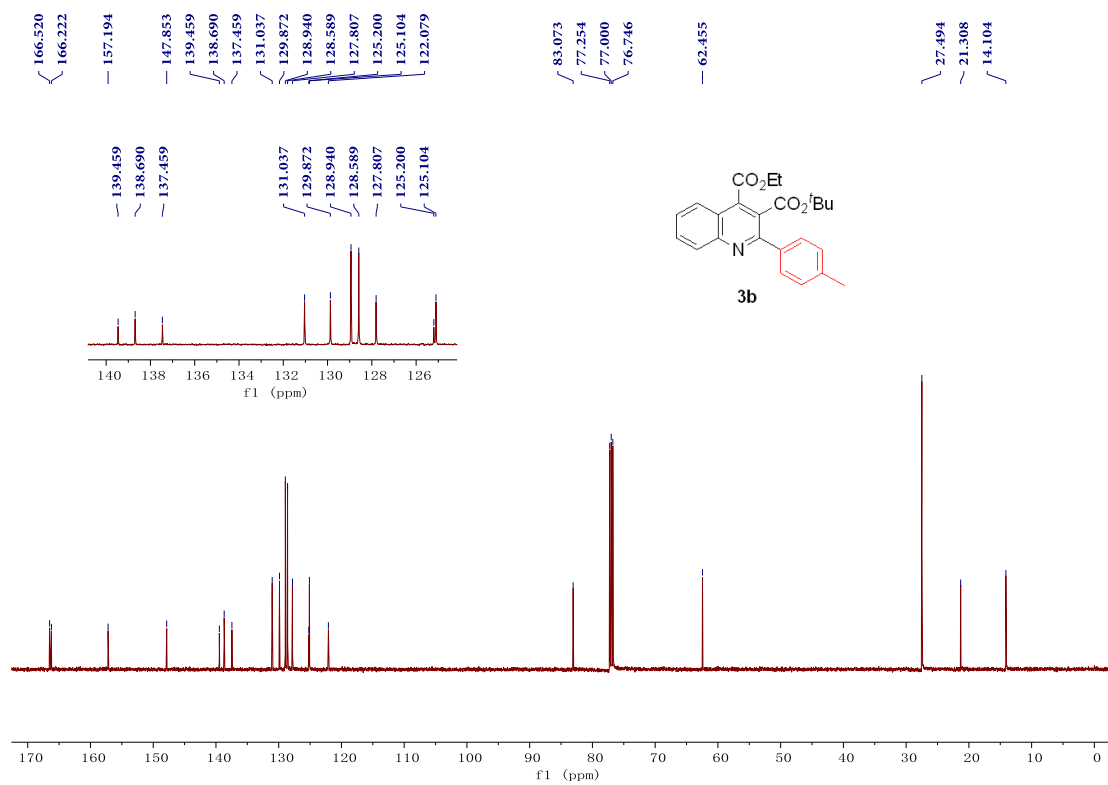

# $^1\text{H}$ NMR (500 MHz, $\text{CDCl}_3$ )

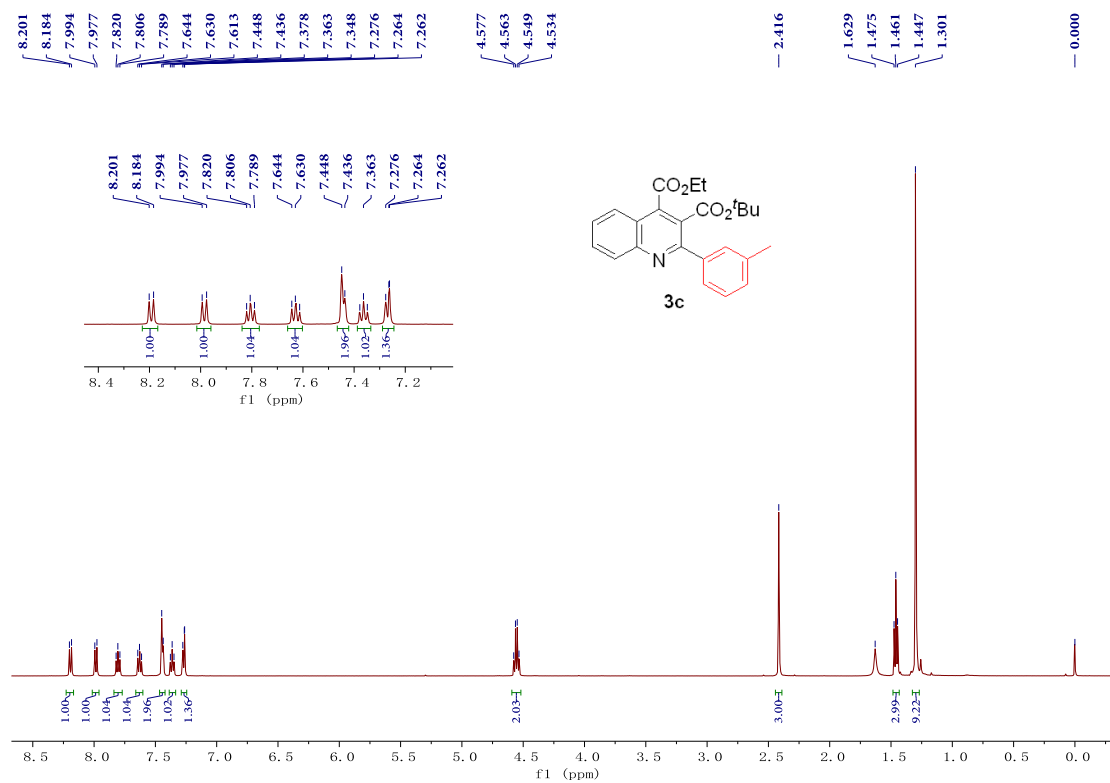

# $^{13}\text{C}$ NMR (125 MHz, $\text{CDCl}_3$ )

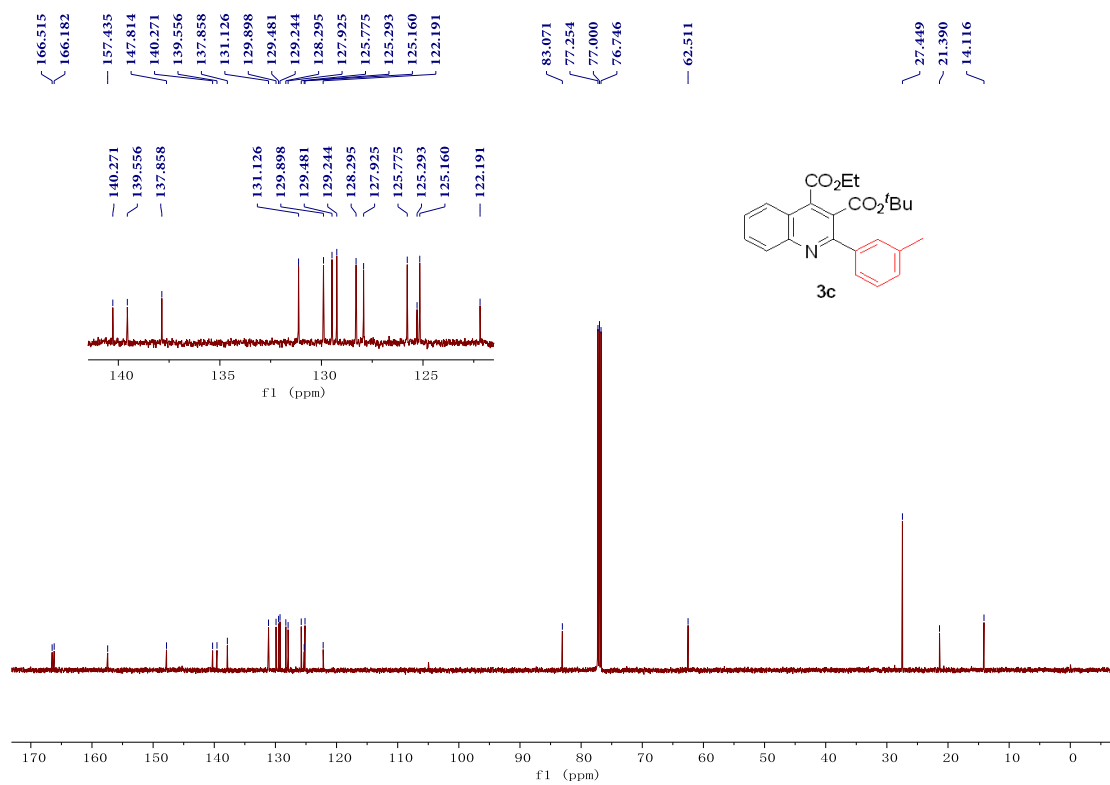

# <sup>1</sup>H NMR (500 MHz, CDCl<sub>3</sub>)

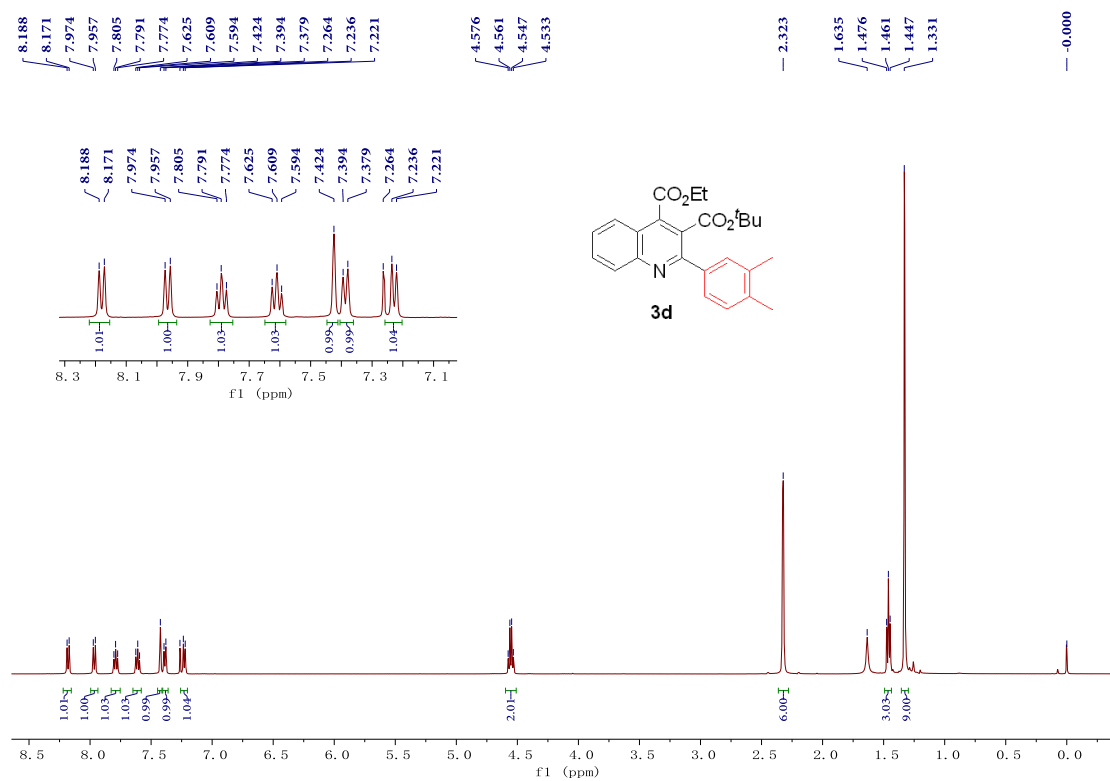

# <sup>13</sup>C NMR (125 MHz, CDCl<sub>3</sub>)

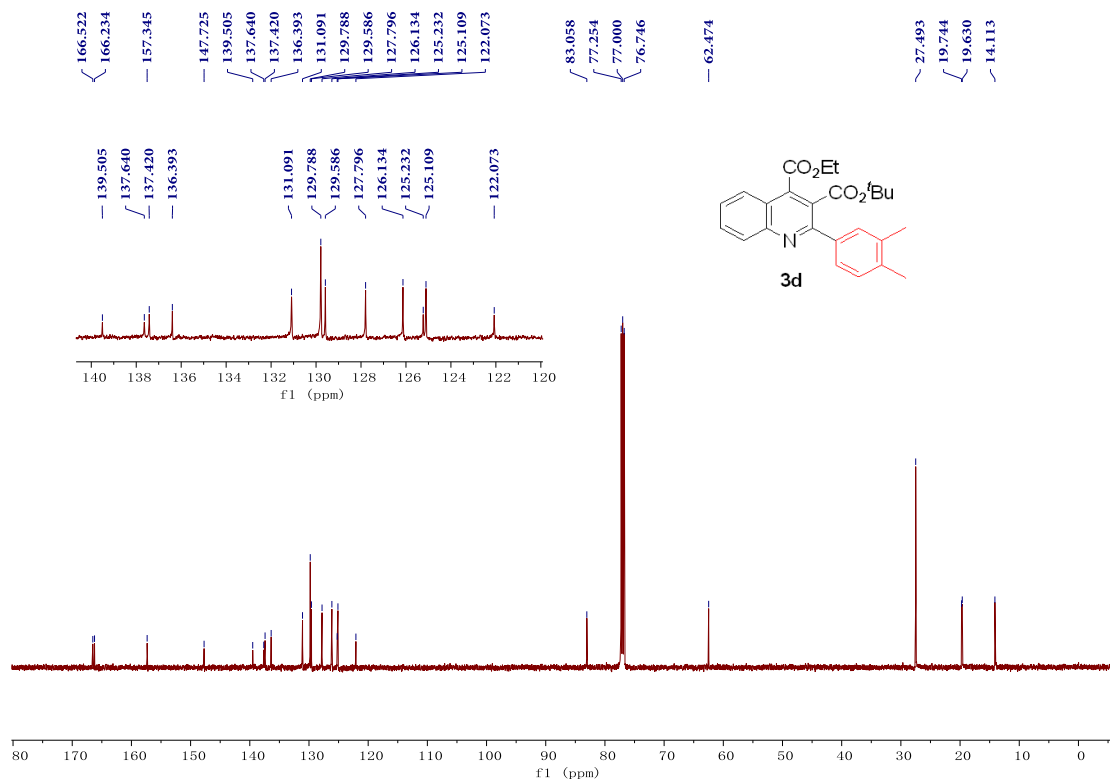

# $^1\text{H}$ NMR (500 MHz, $\text{CDCl}_3$ )

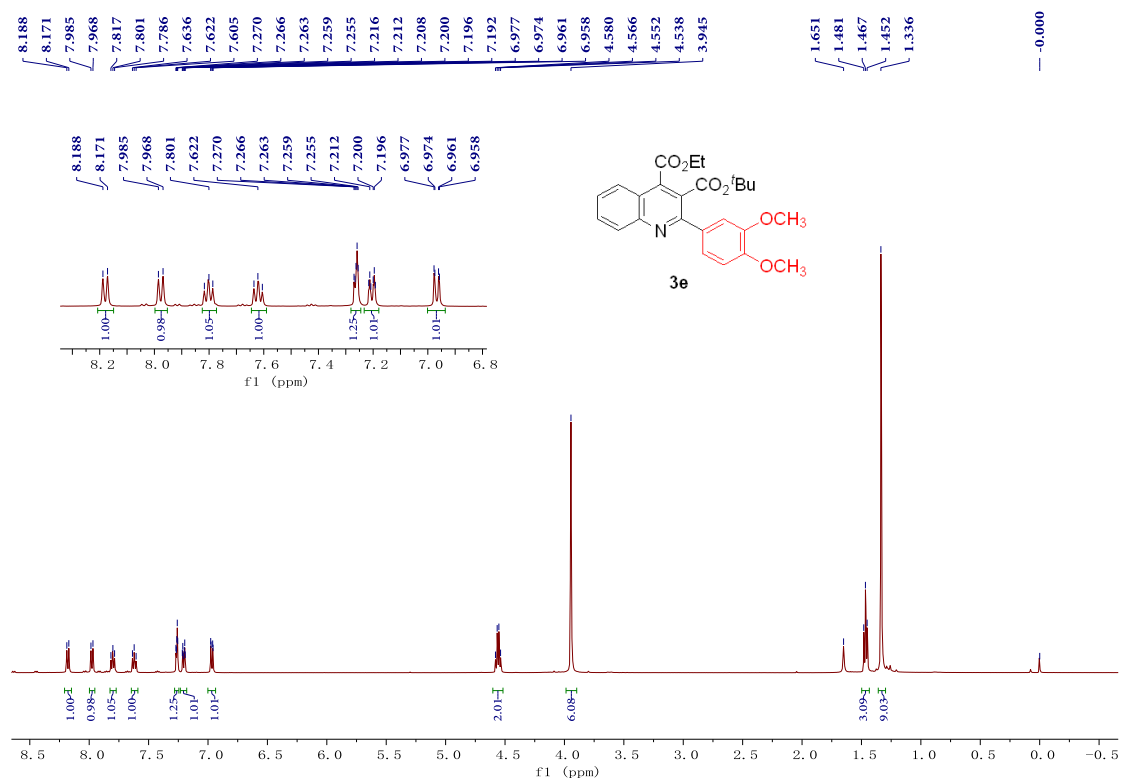

# $^{13}\text{C}$ NMR (125 MHz, $\text{CDCl}_3$ )

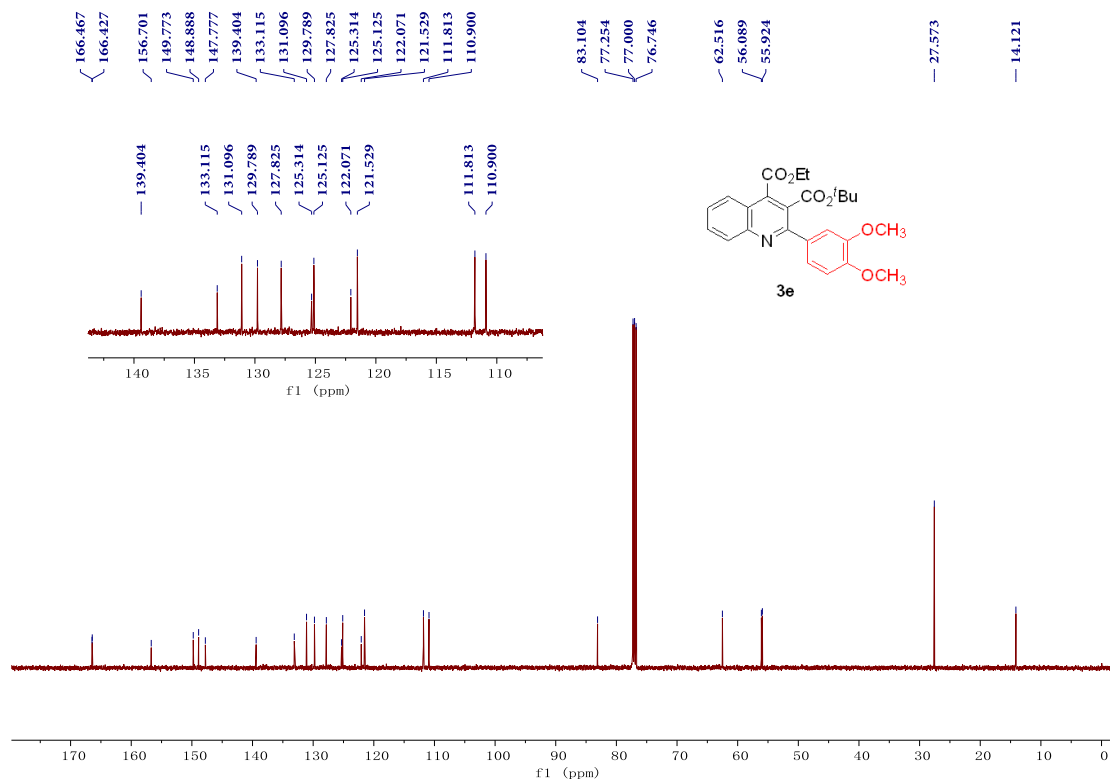

# <sup>1</sup>H NMR (500 MHz, CDCl<sub>3</sub>)

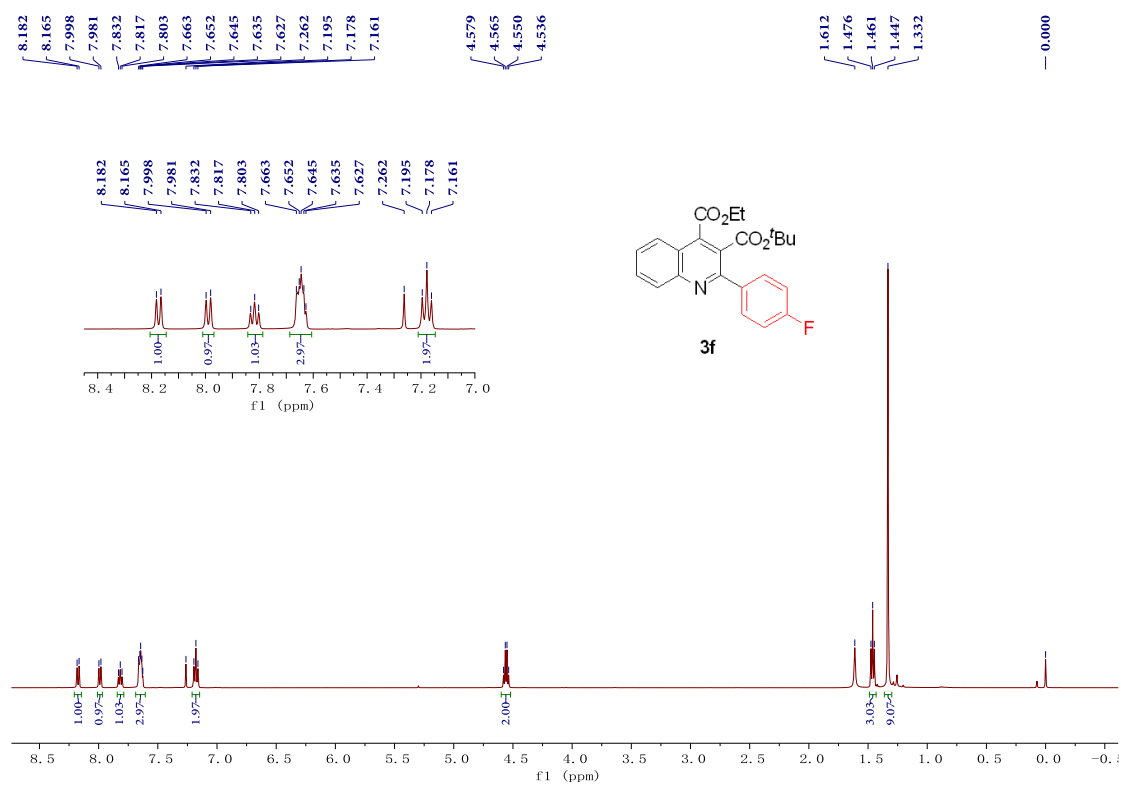

# <sup>13</sup>C NMR (125 MHz, CDCl<sub>3</sub>)

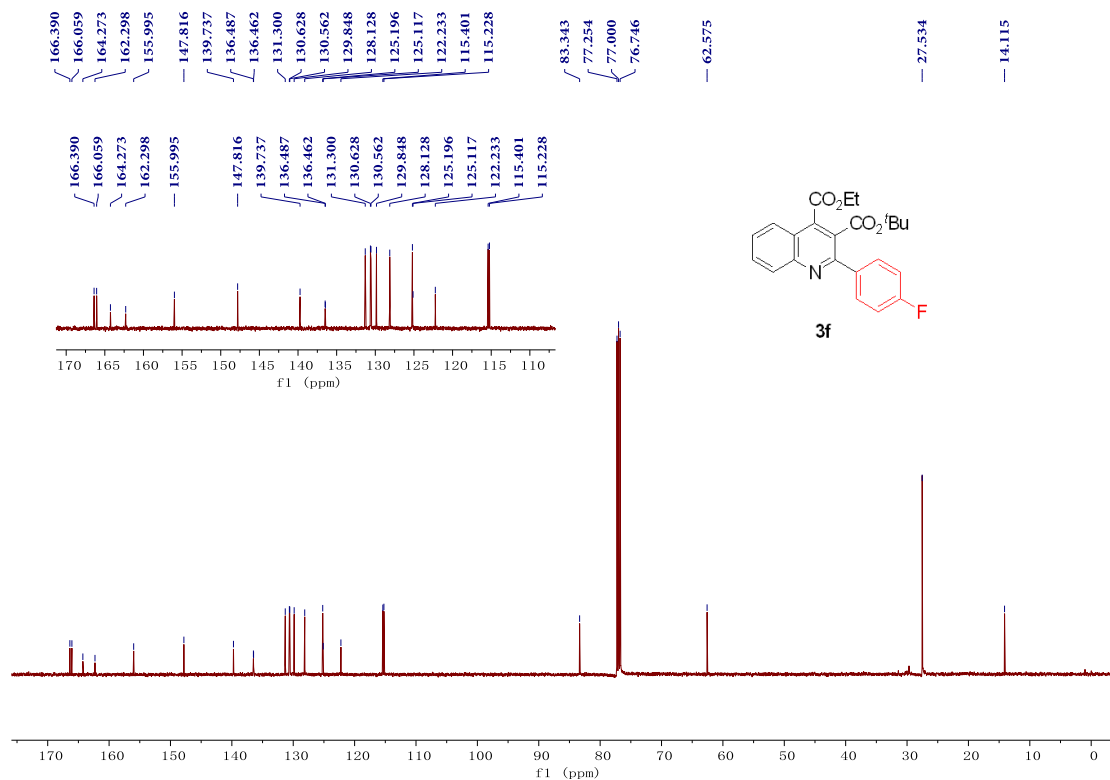



$^1\text{H}$  NMR (500 MHz,  $\text{CDCl}_3$ )

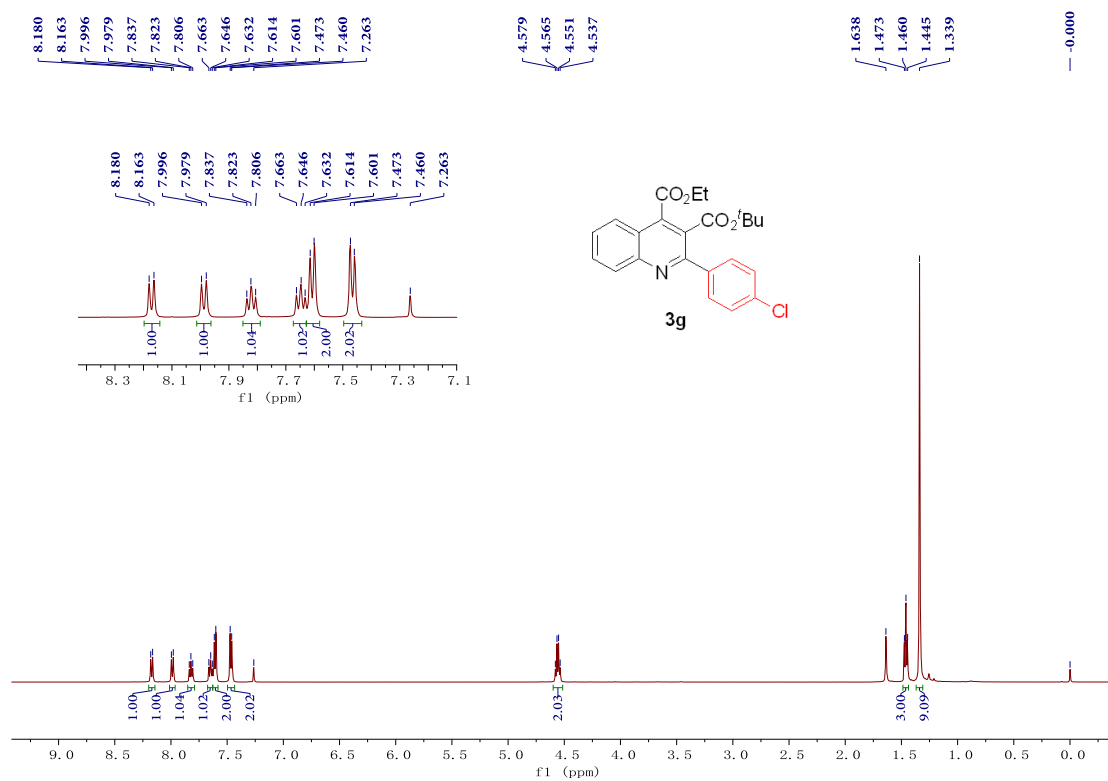

$^{13}\text{C}$  NMR (125 MHz,  $\text{CDCl}_3$ )

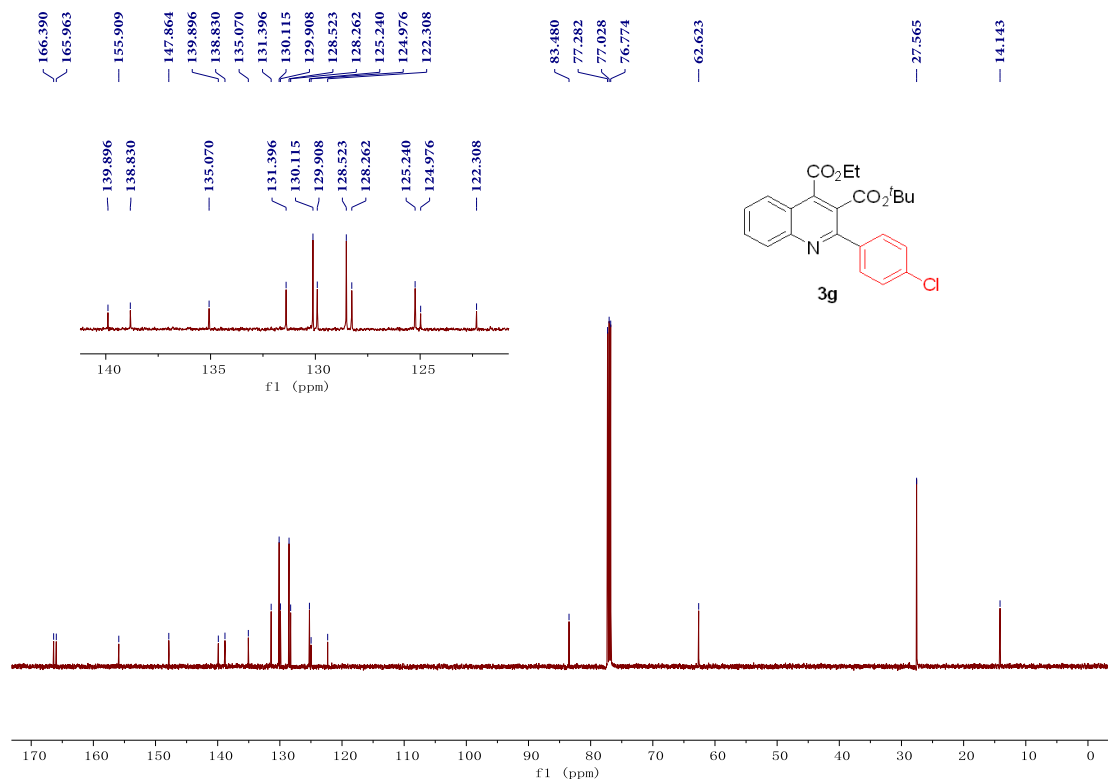

<sup>1</sup>H NMR (500 MHz, CDCl<sub>3</sub>)

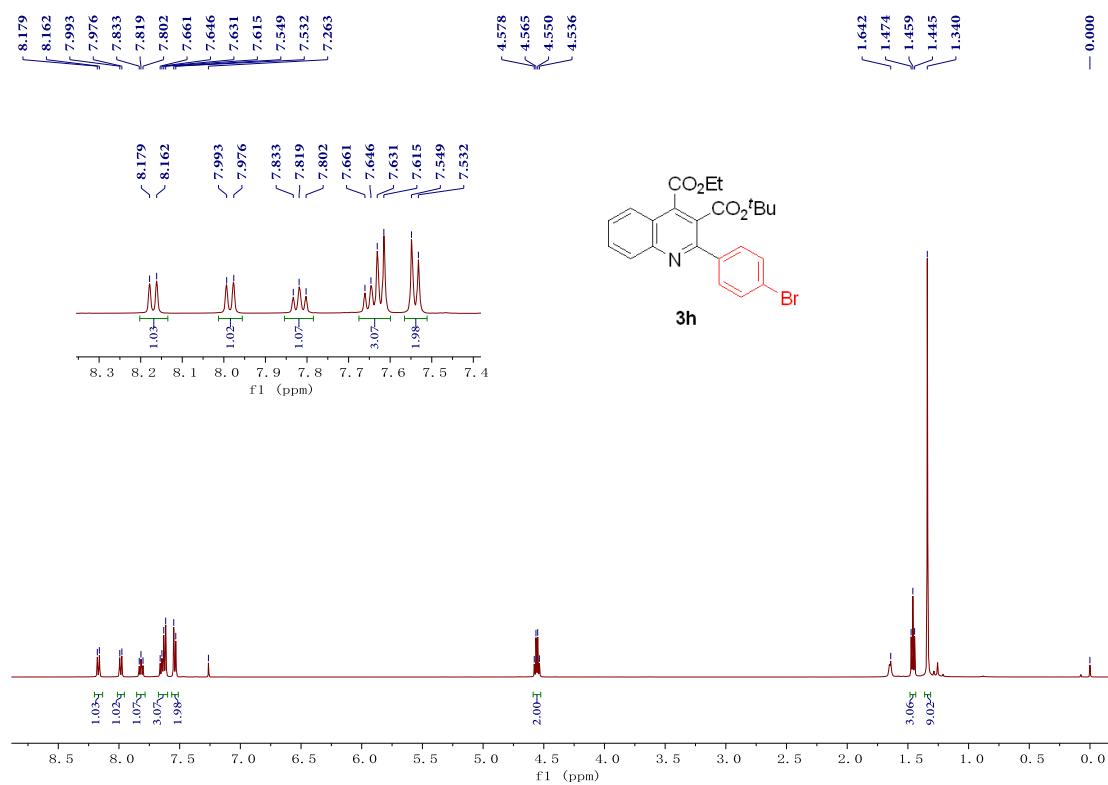

<sup>13</sup>C NMR (125 MHz, CDCl<sub>3</sub>)

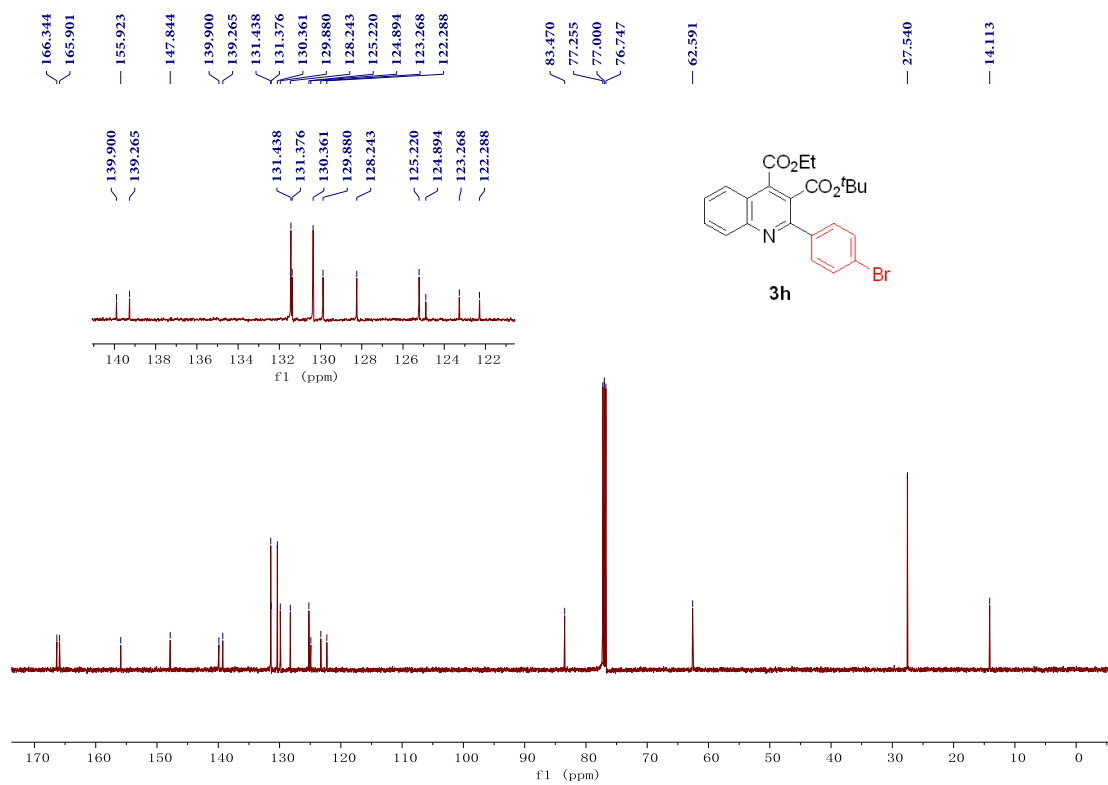

<sup>1</sup>H NMR (500 MHz, CDCl<sub>3</sub>)

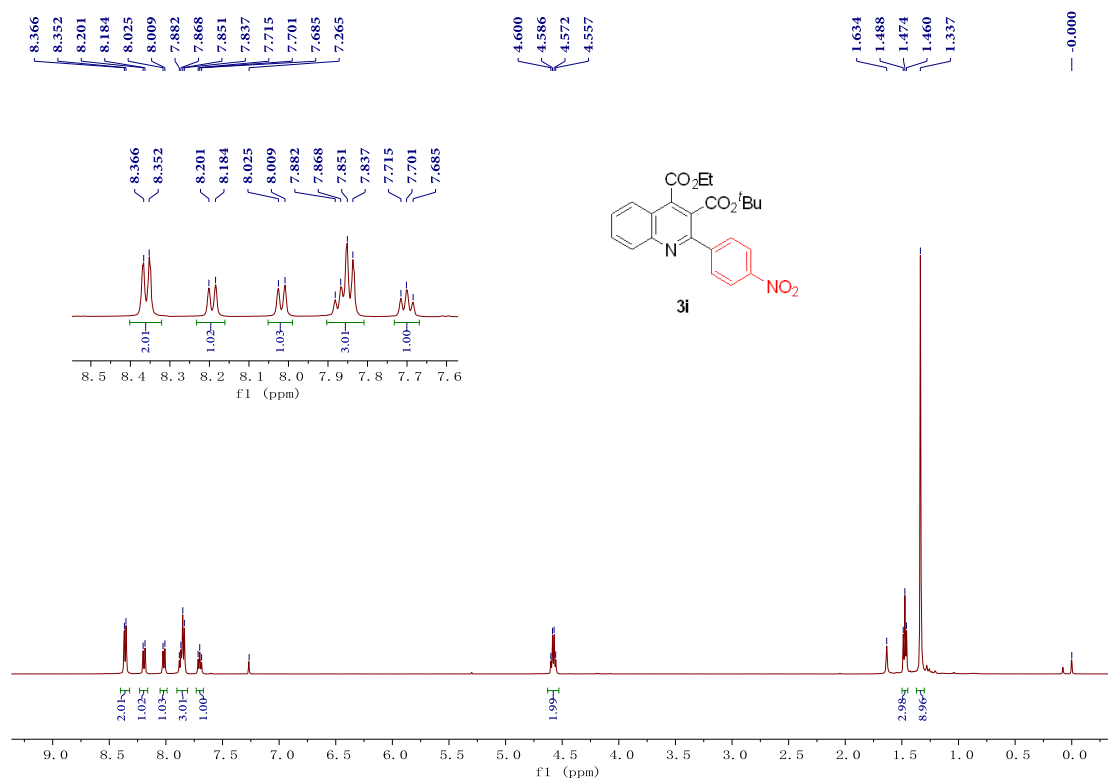

<sup>13</sup>C NMR (125 MHz, CDCl<sub>3</sub>)

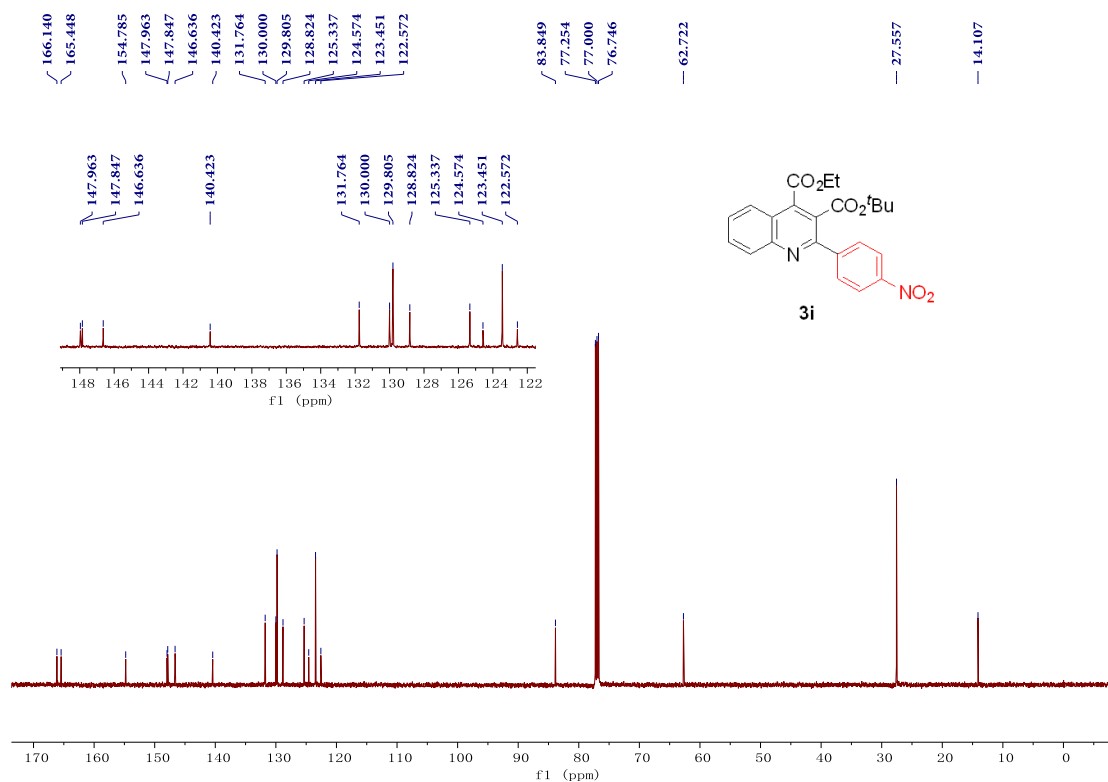

<sup>1</sup>H NMR (500 MHz, CDCl<sub>3</sub>)

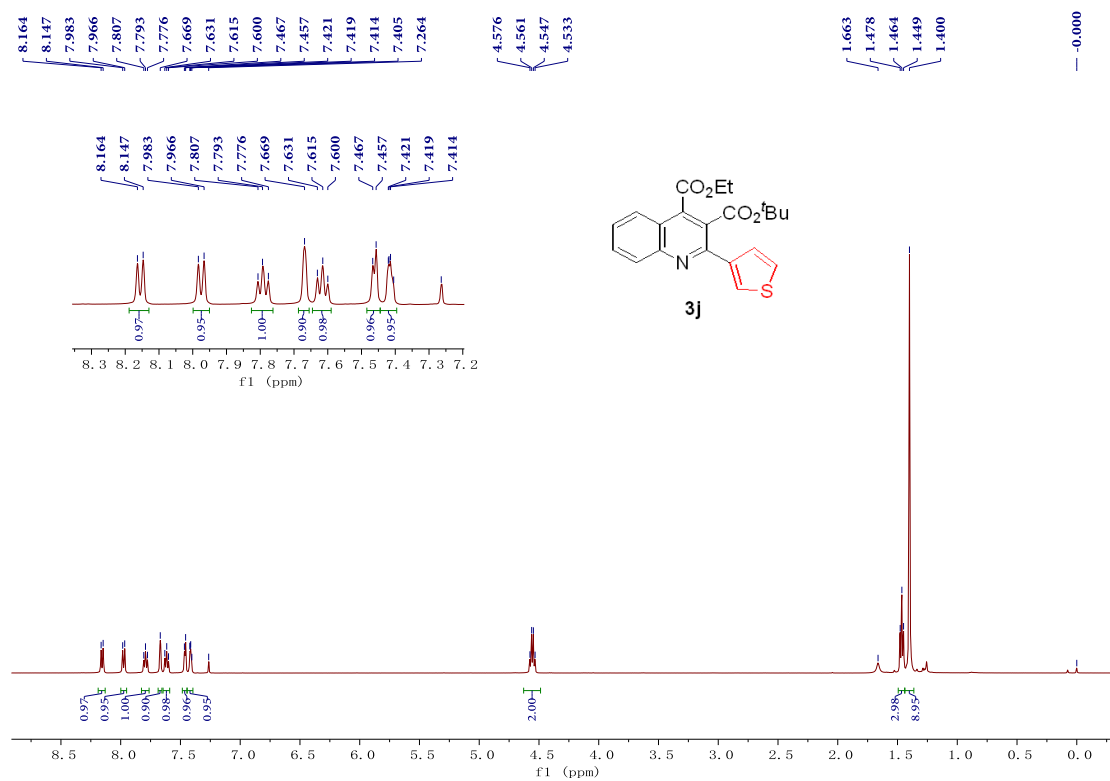

<sup>13</sup>C NMR (125 MHz, CDCl<sub>3</sub>)

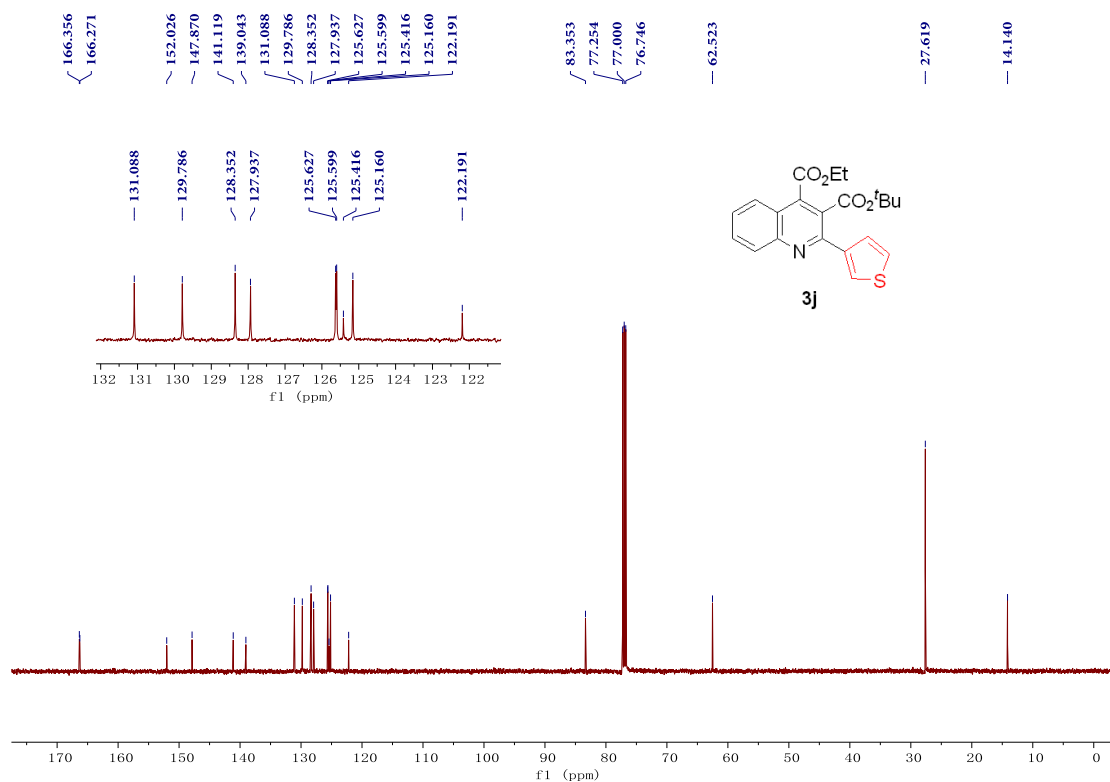

<sup>1</sup>H NMR (600 MHz, CDCl<sub>3</sub>)

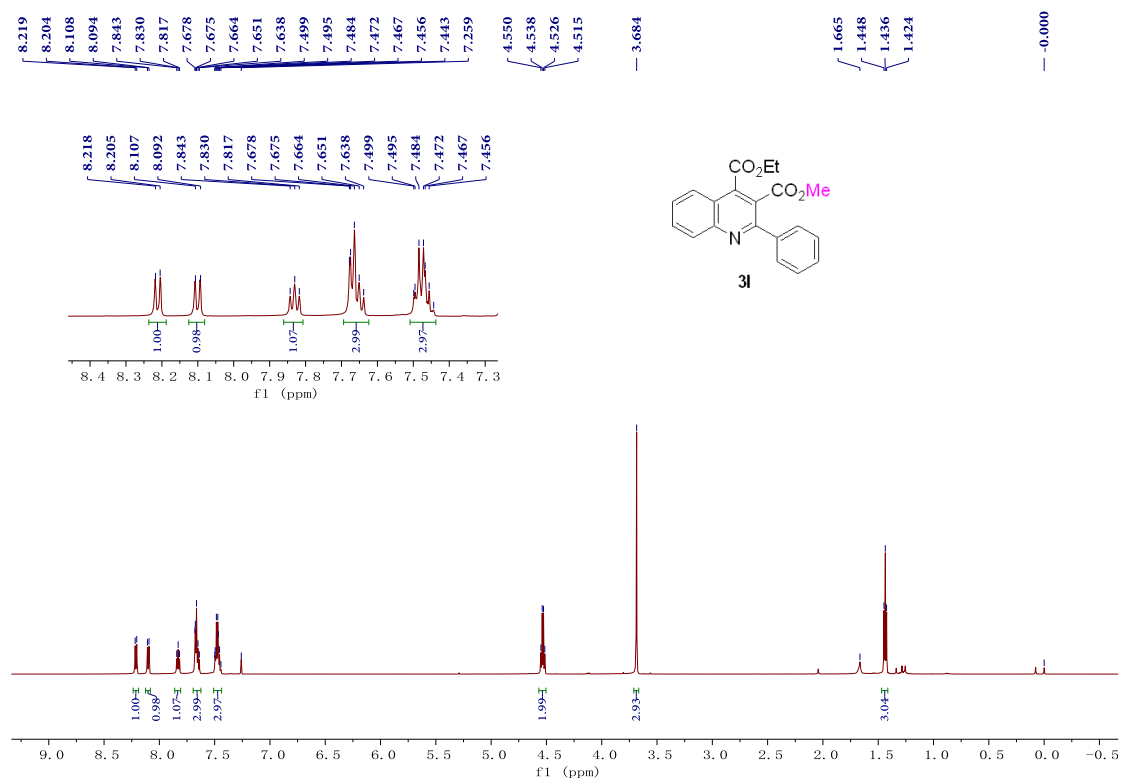

<sup>13</sup>C NMR (150 MHz, CDCl<sub>3</sub>)

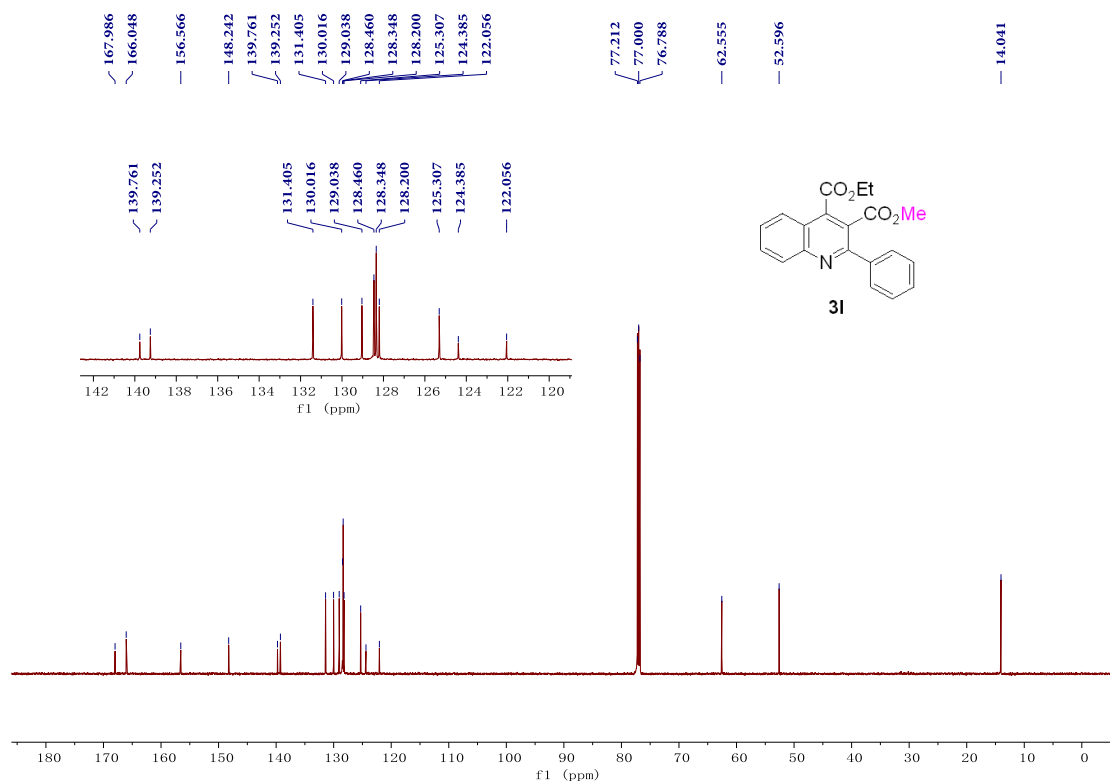

<sup>1</sup>H NMR (500 MHz, CDCl<sub>3</sub>)

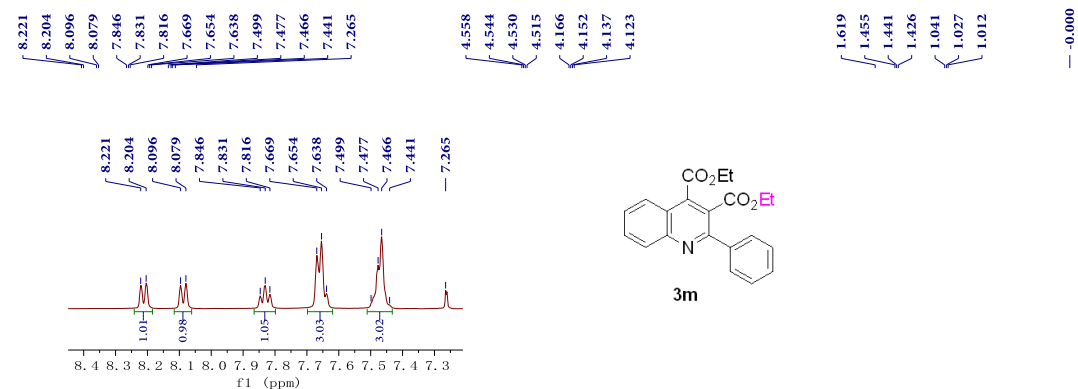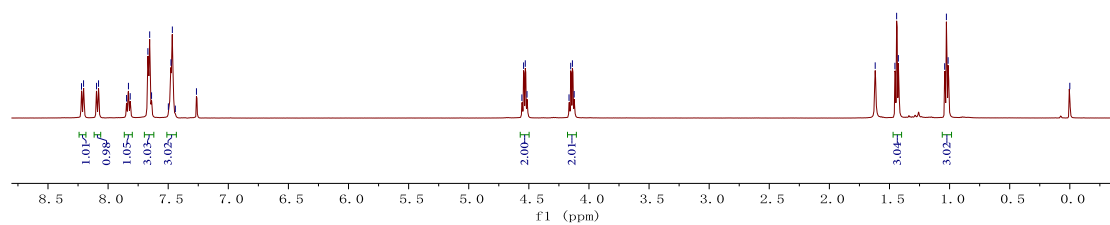

<sup>13</sup>C NMR (125 MHz, CDCl<sub>3</sub>)

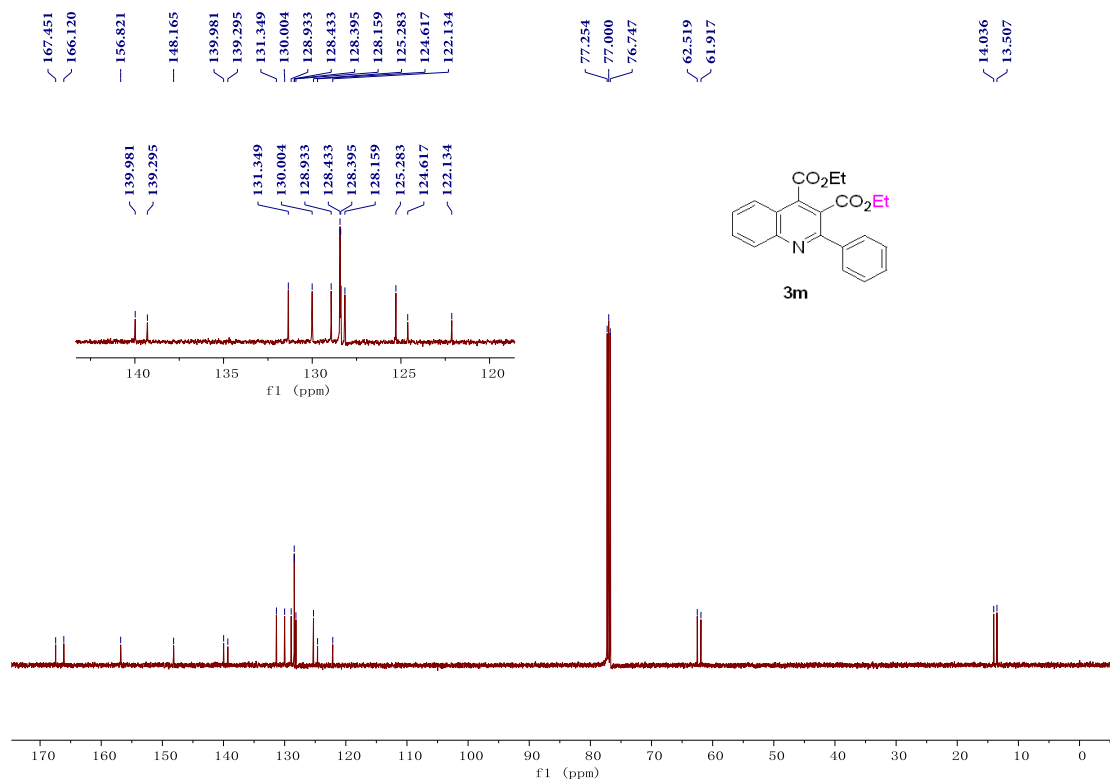

# <sup>1</sup>H NMR (600 MHz, CDCl<sub>3</sub>)

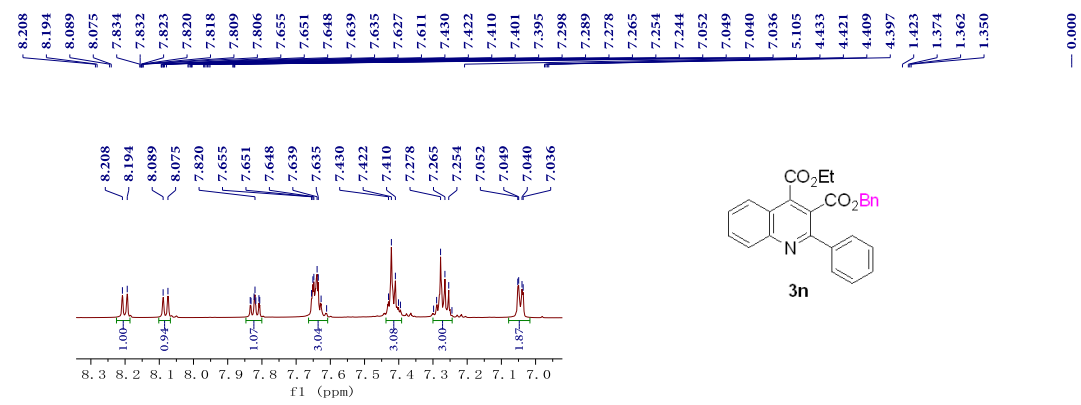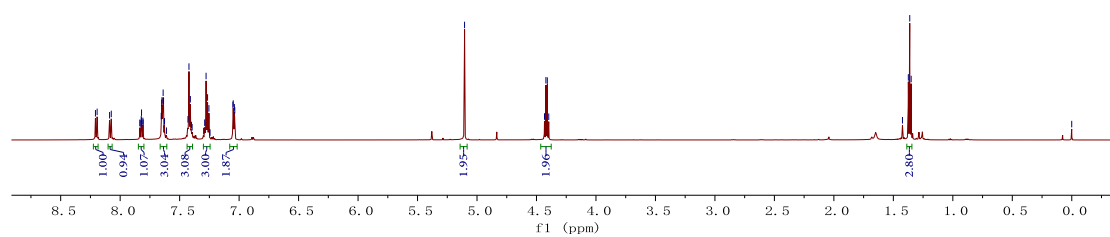

# <sup>13</sup>C NMR (150 MHz, CDCl<sub>3</sub>)

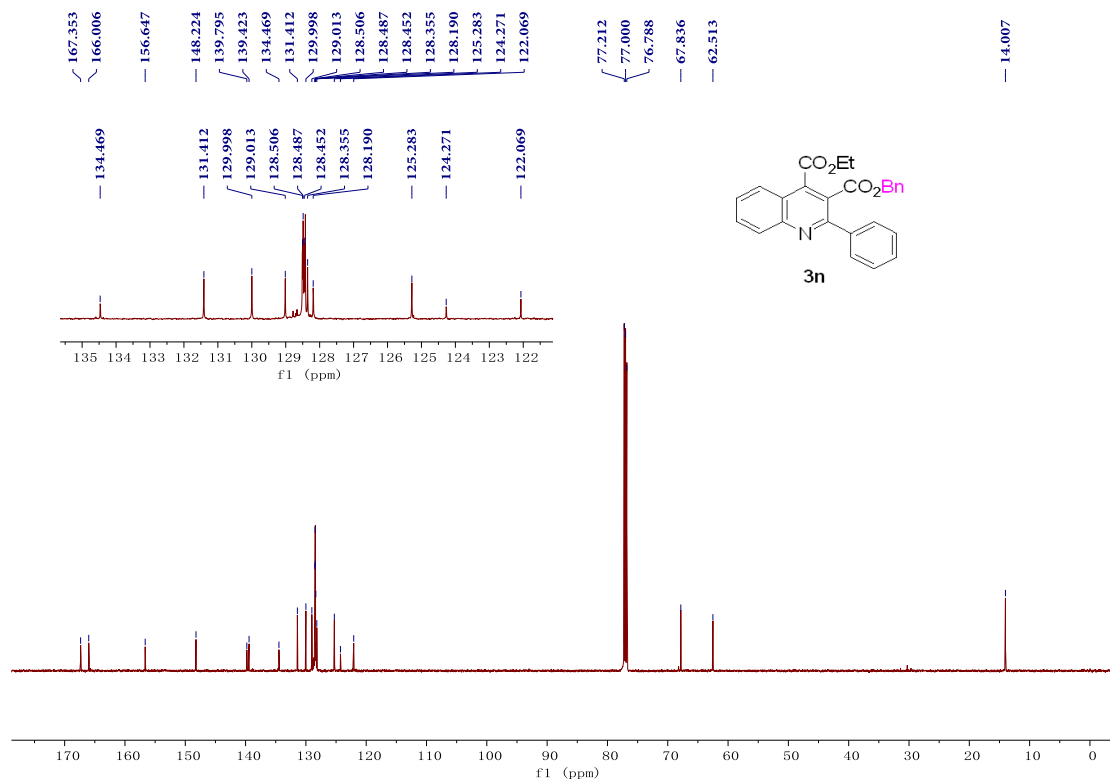

$^1\text{H}$  NMR (600 MHz,  $\text{CDCl}_3$ )

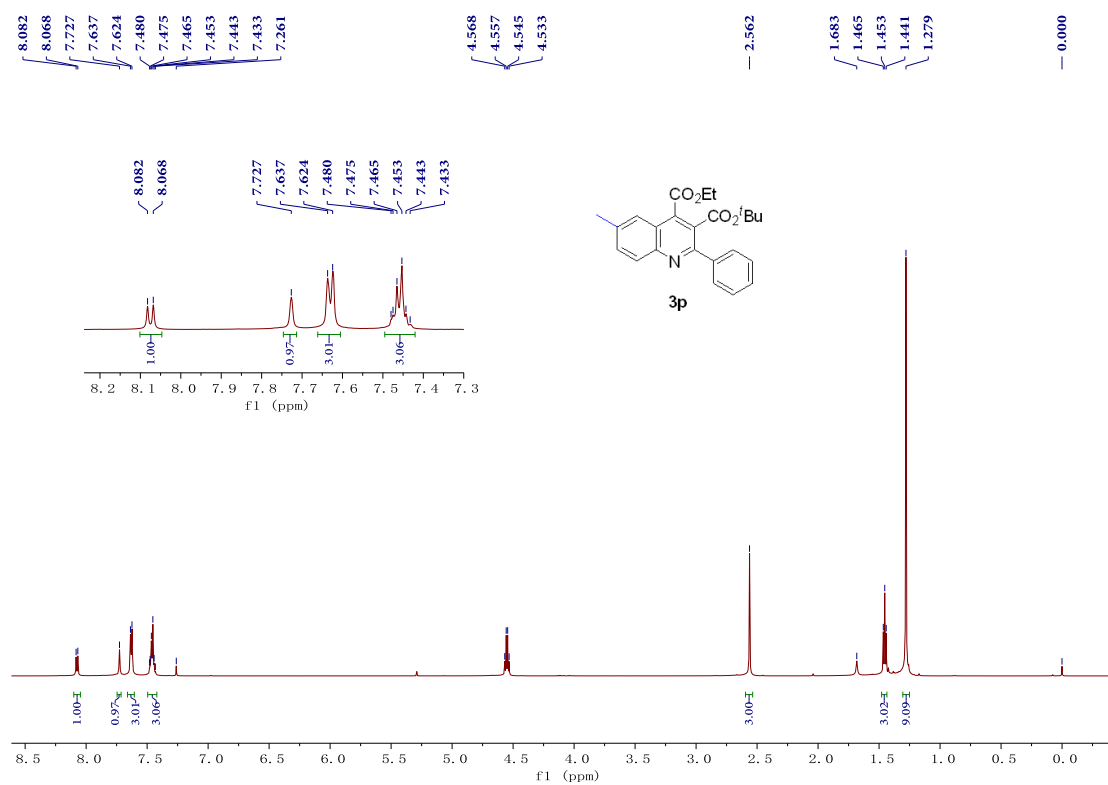

$^{13}\text{C}$  NMR (150 MHz,  $\text{CDCl}_3$ )

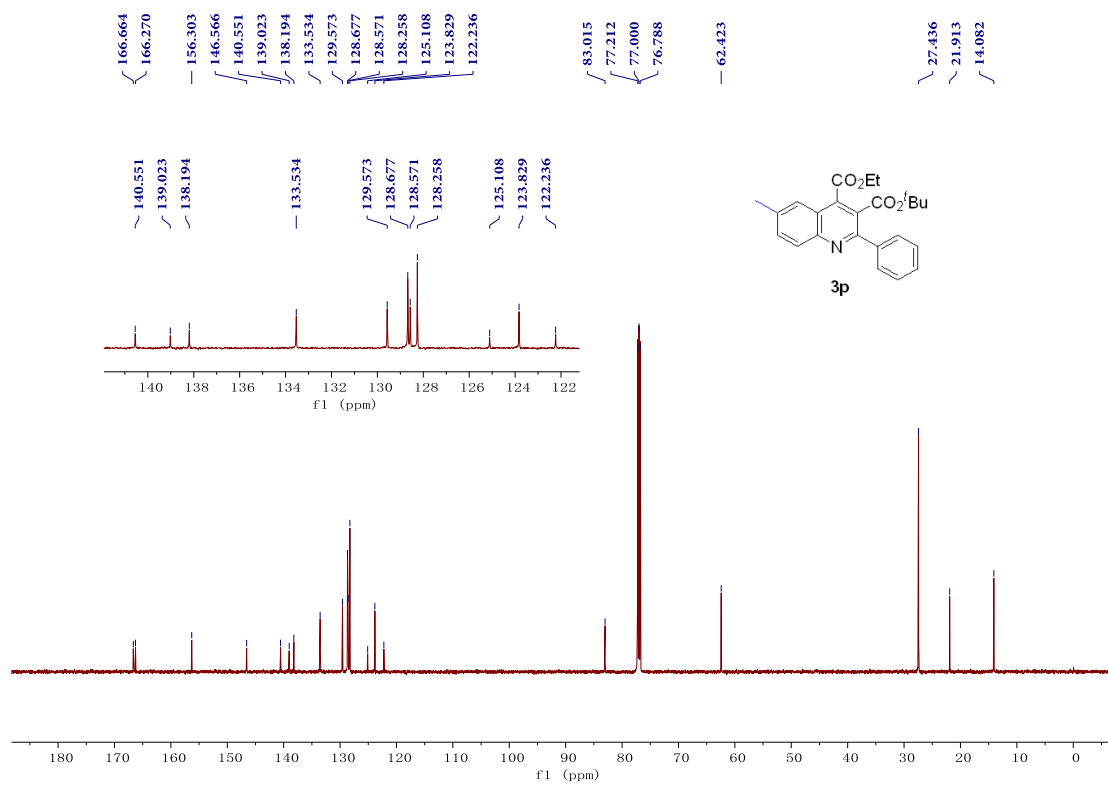



$^1\text{H}$  NMR (600 MHz,  $\text{CDCl}_3$ )

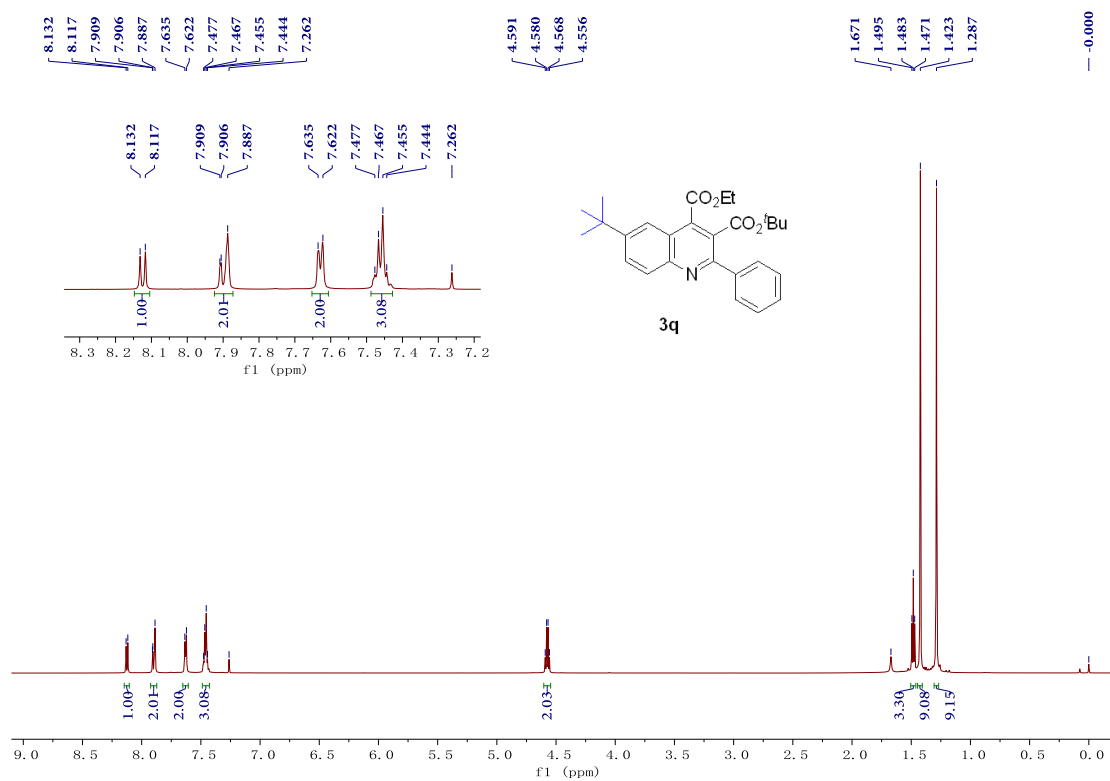

$^{13}\text{C}$  NMR (150 MHz,  $\text{CDCl}_3$ )

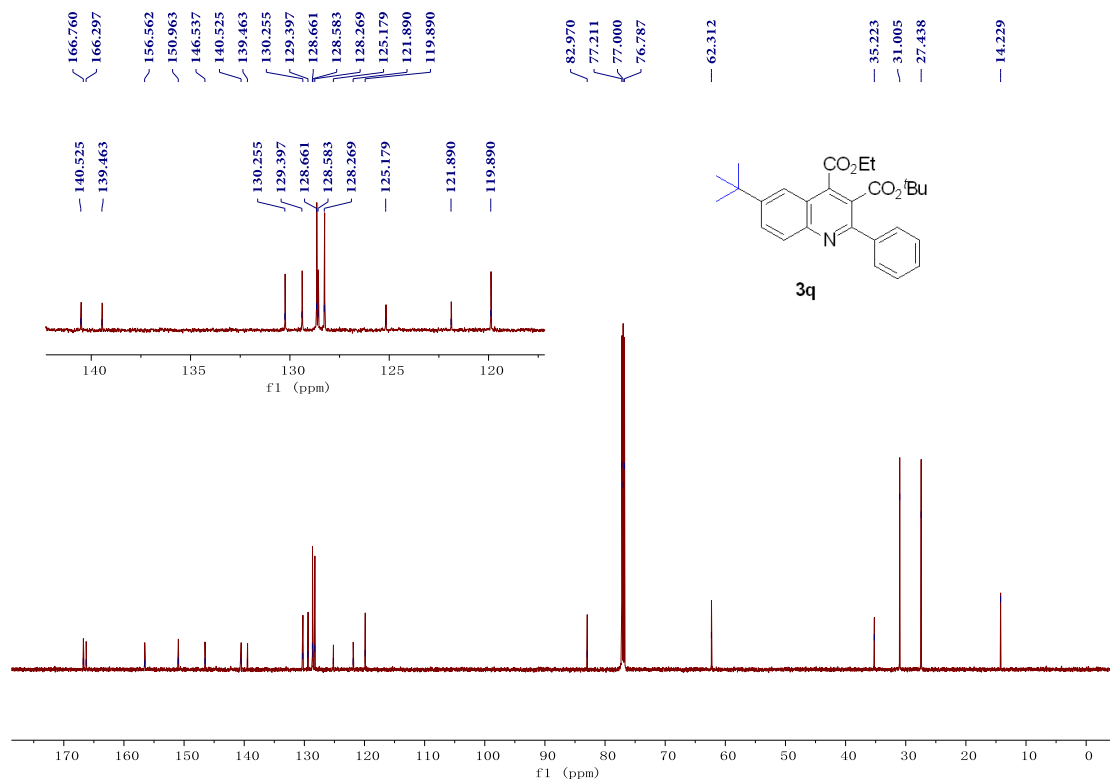

<sup>1</sup>H NMR (600 MHz, CDCl<sub>3</sub>)

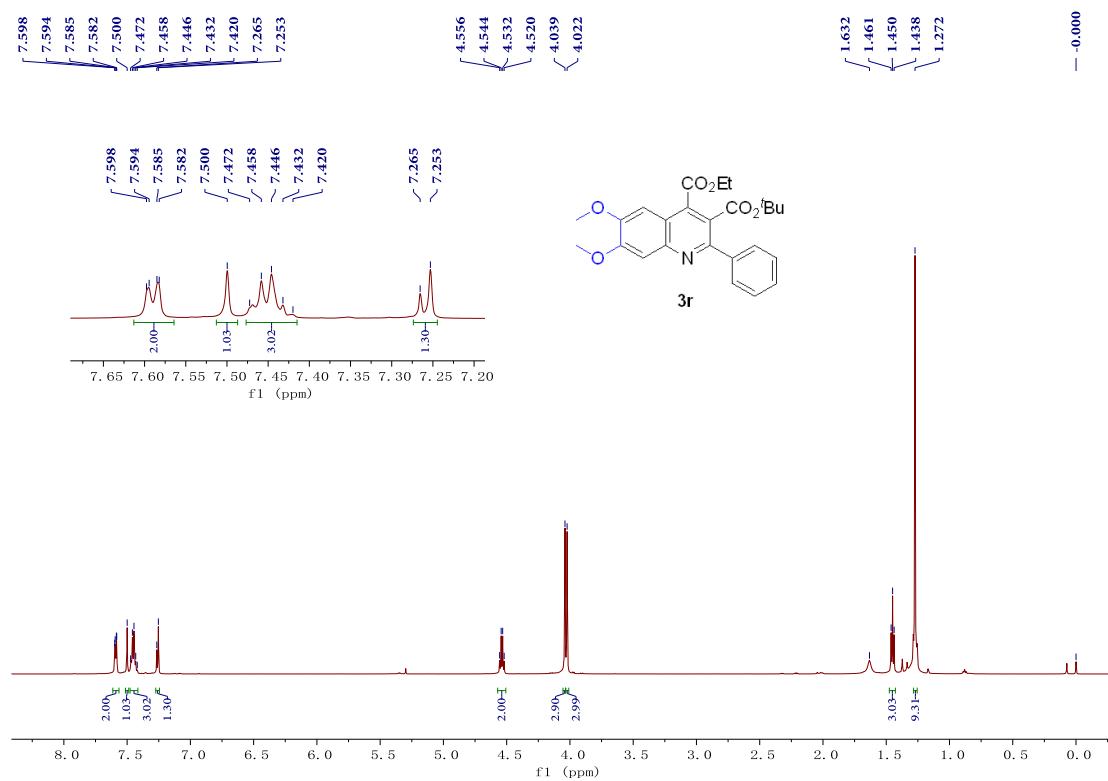

<sup>13</sup>C NMR (150 MHz, CDCl<sub>3</sub>)

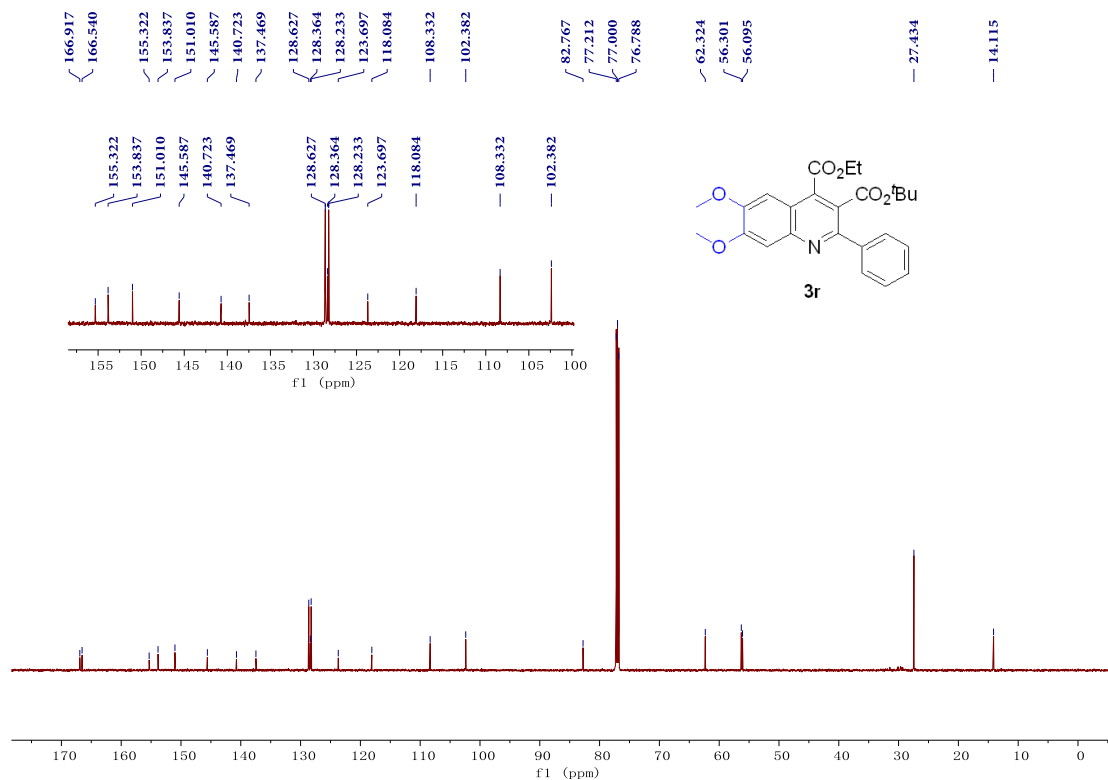

<sup>1</sup>H NMR (600 MHz, CDCl<sub>3</sub>)

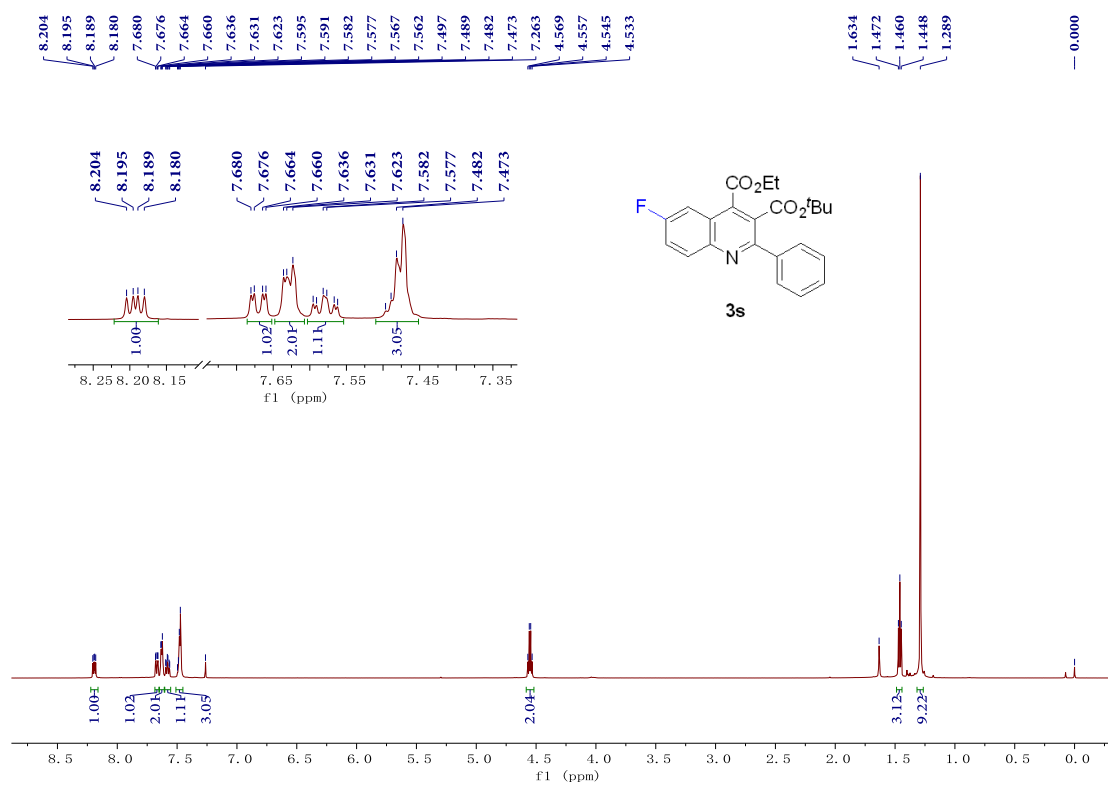

<sup>13</sup>C NMR (150 MHz, CDCl<sub>3</sub>)

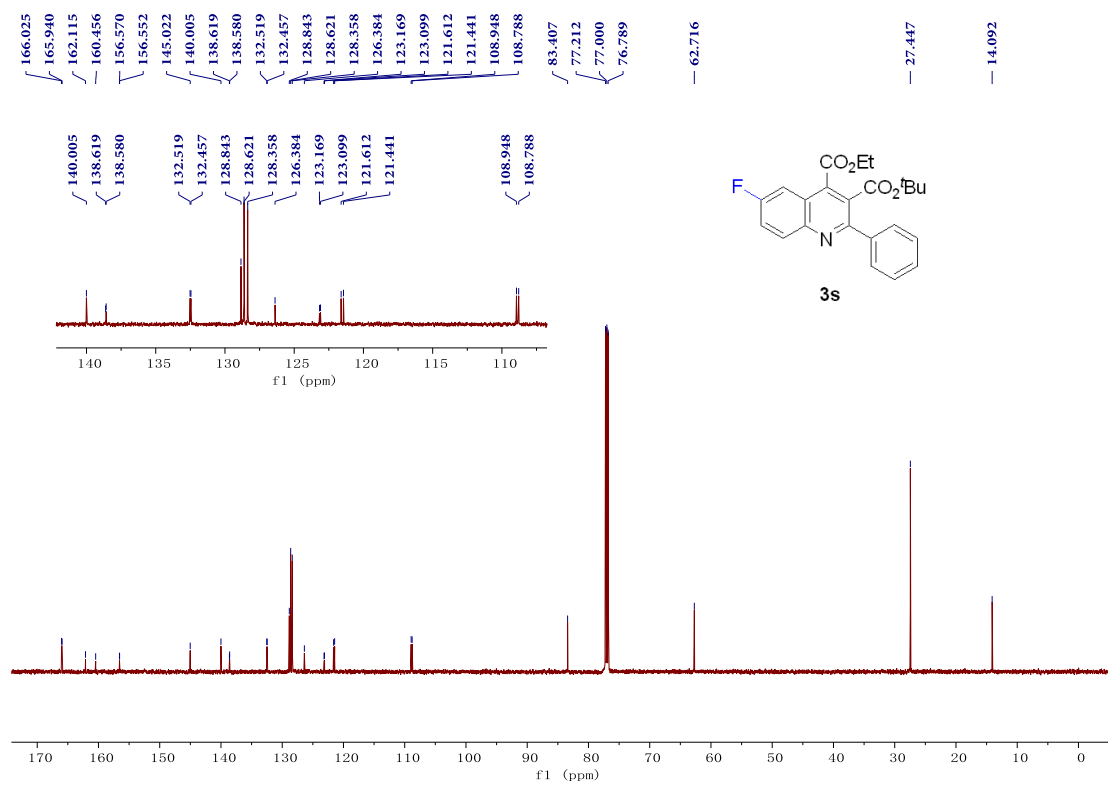

<sup>1</sup>H NMR (500 MHz, CDCl<sub>3</sub>)

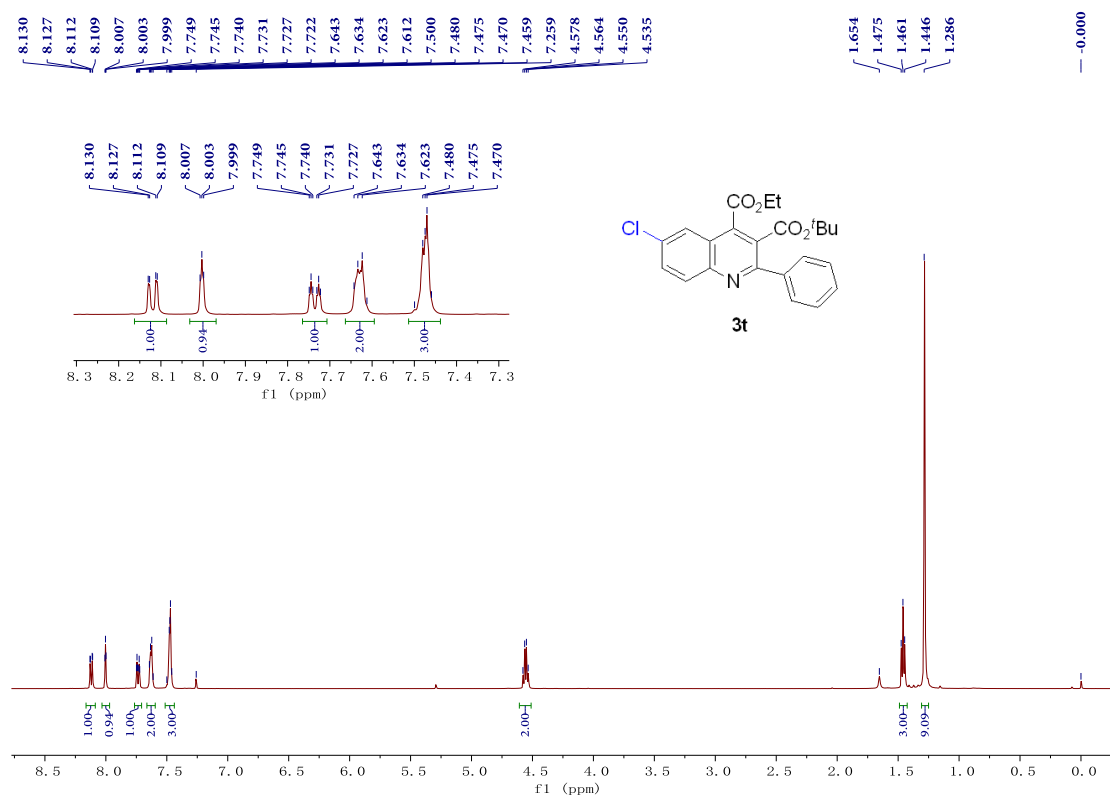

<sup>13</sup>C NMR (125 MHz, CDCl<sub>3</sub>)

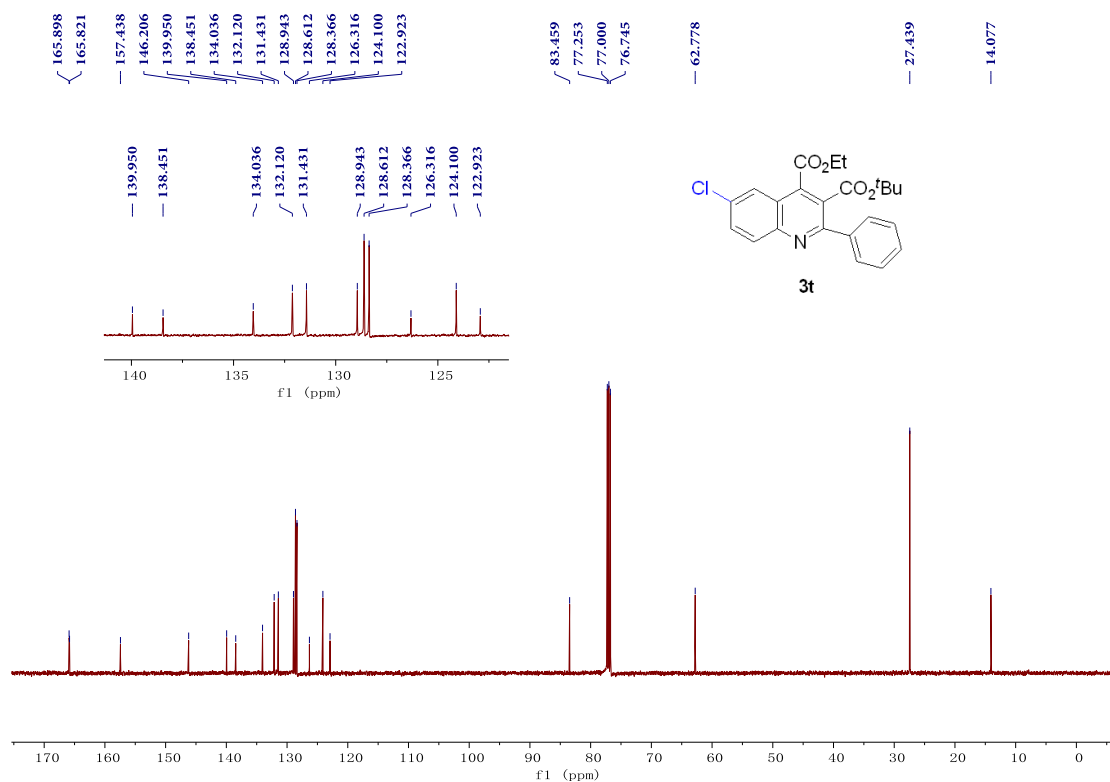

# <sup>1</sup>H NMR (500 MHz, CDCl<sub>3</sub>)

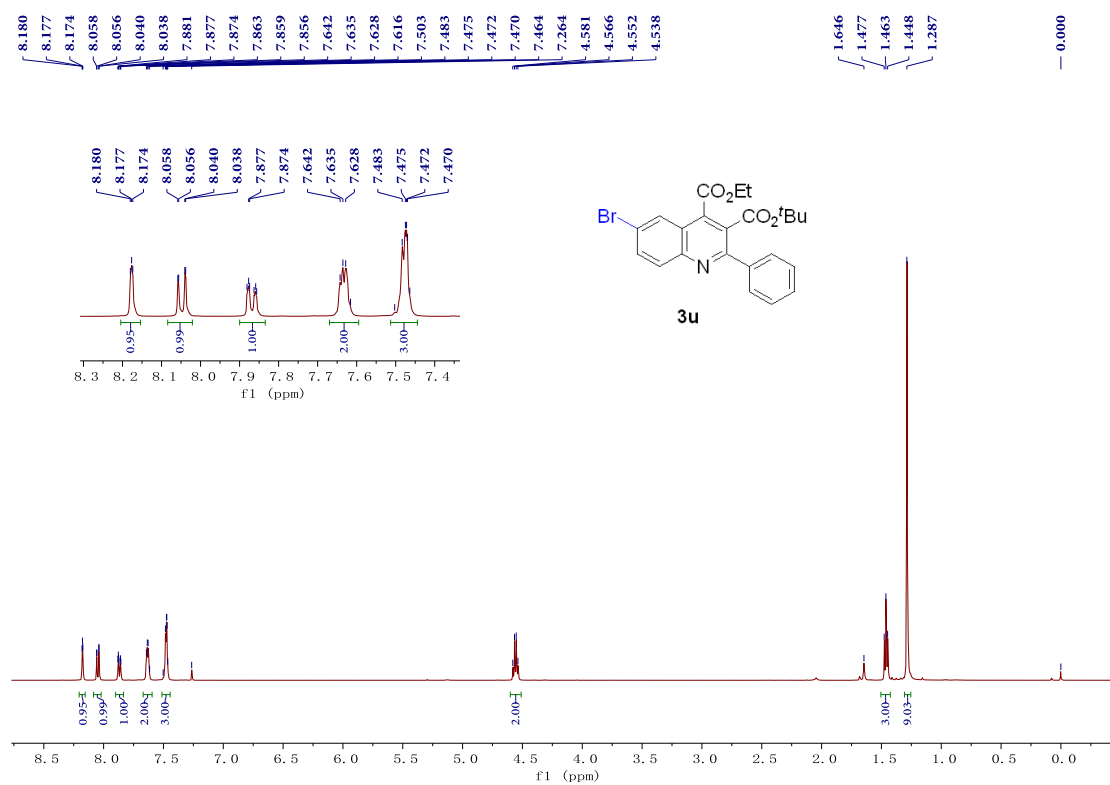

# <sup>13</sup>C NMR (125 MHz, CDCl<sub>3</sub>)

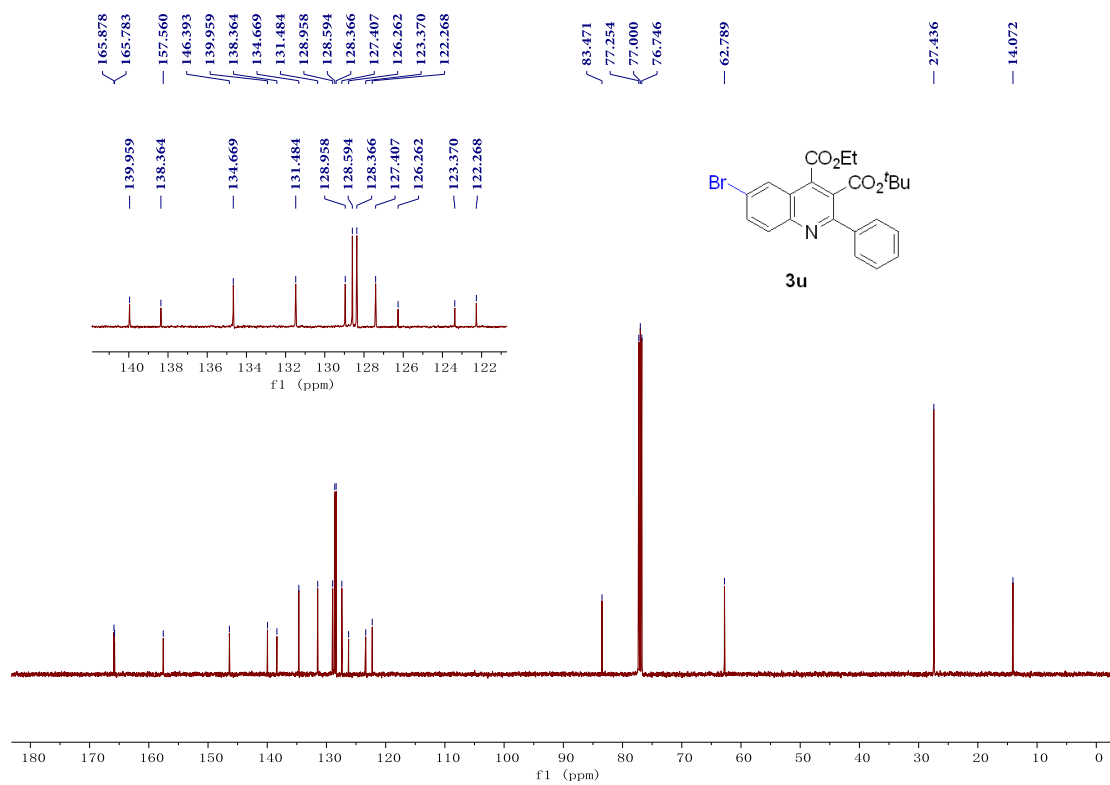

<sup>1</sup>H NMR (500 MHz, CDCl<sub>3</sub>)

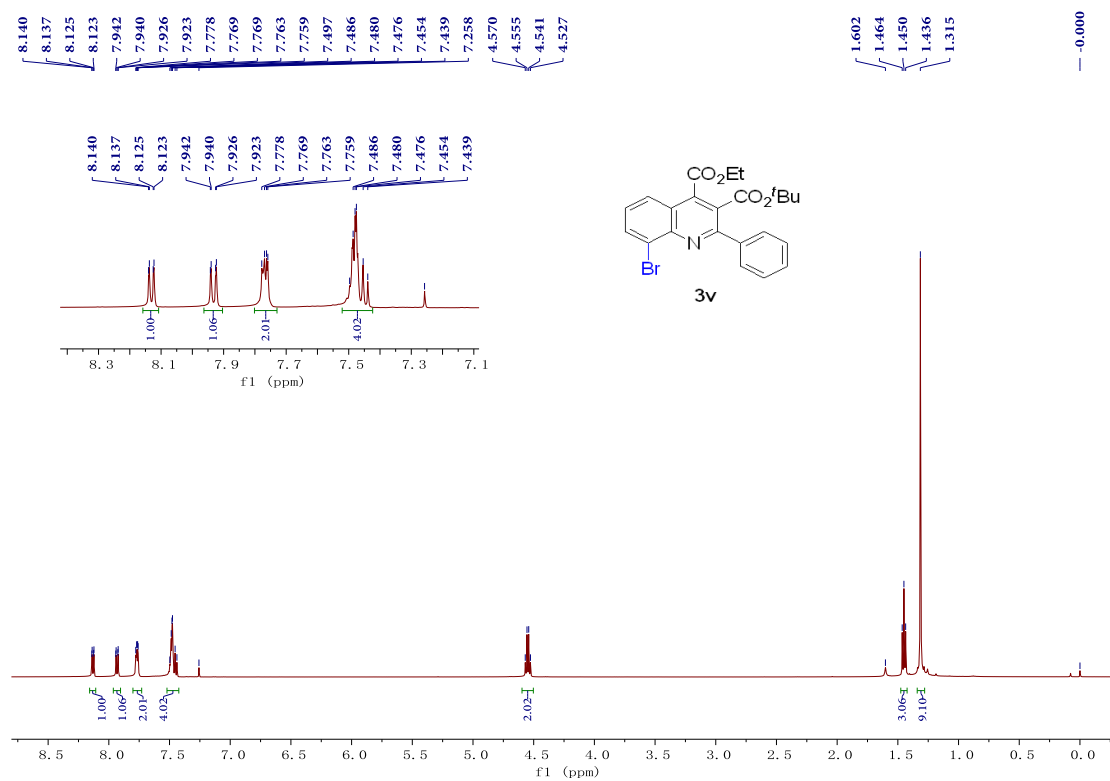

<sup>13</sup>C NMR (125 MHz, CDCl<sub>3</sub>)

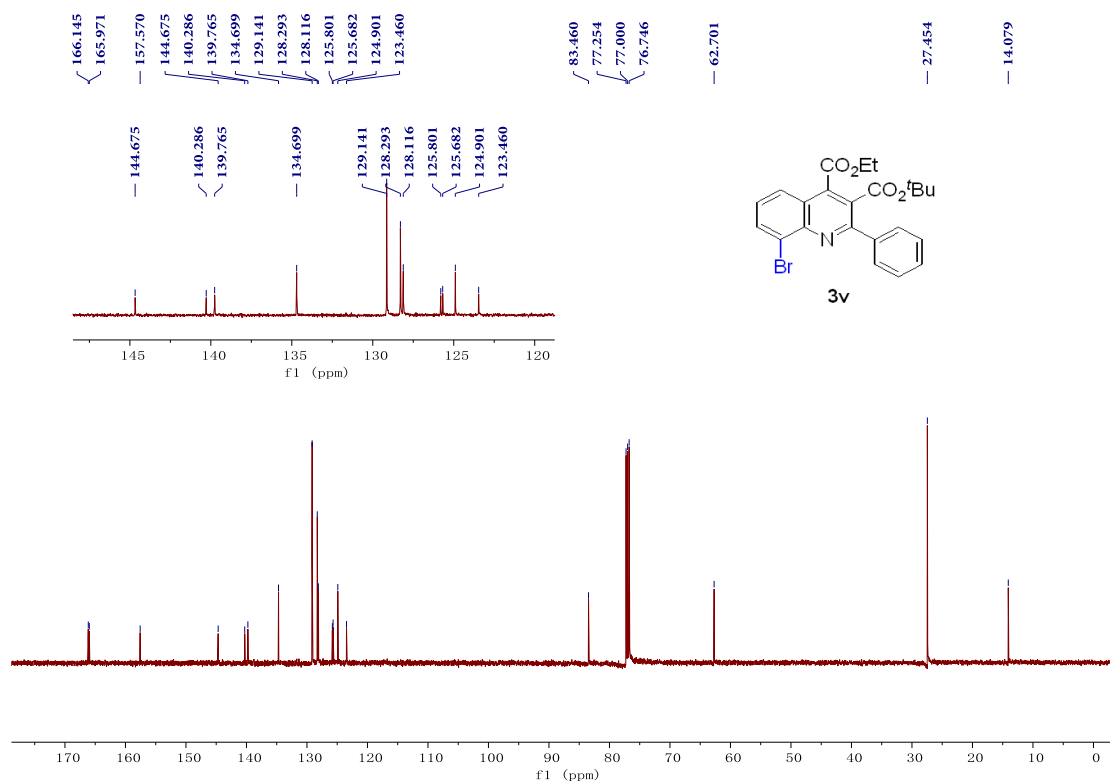

$^1\text{H}$  NMR (600 MHz,  $\text{CDCl}_3$ )

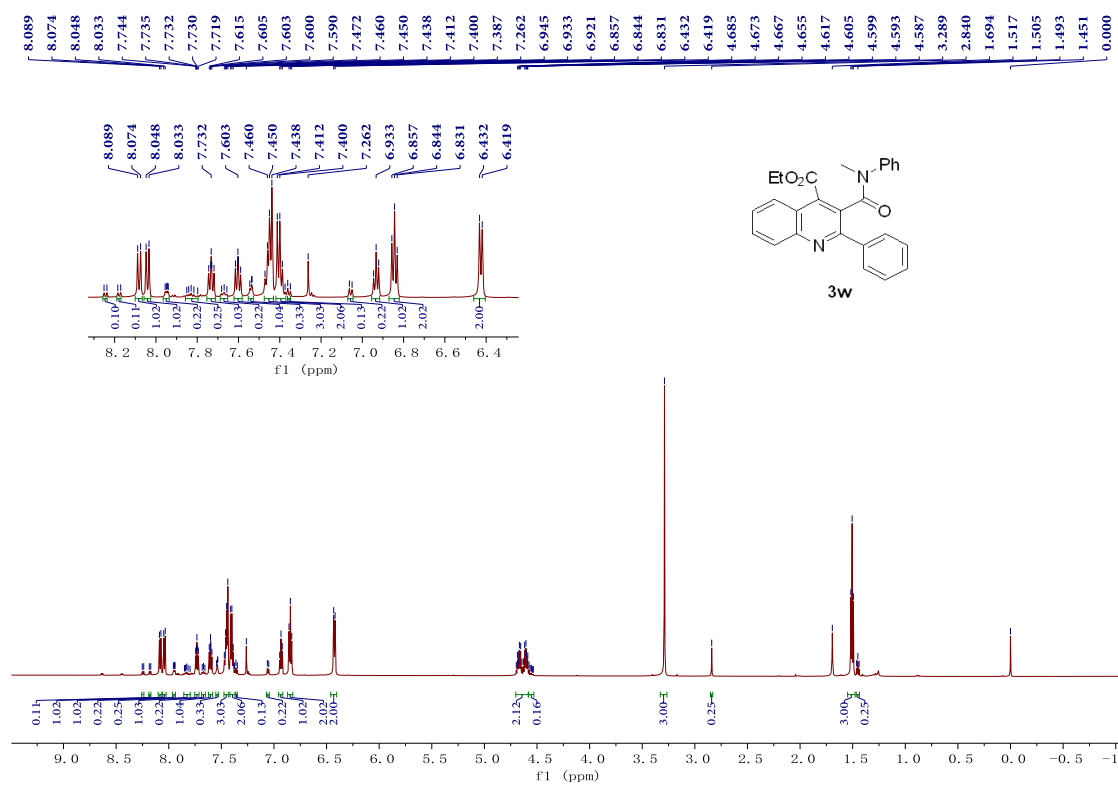

$^{13}\text{C}$  NMR (150 MHz,  $\text{CDCl}_3$ )

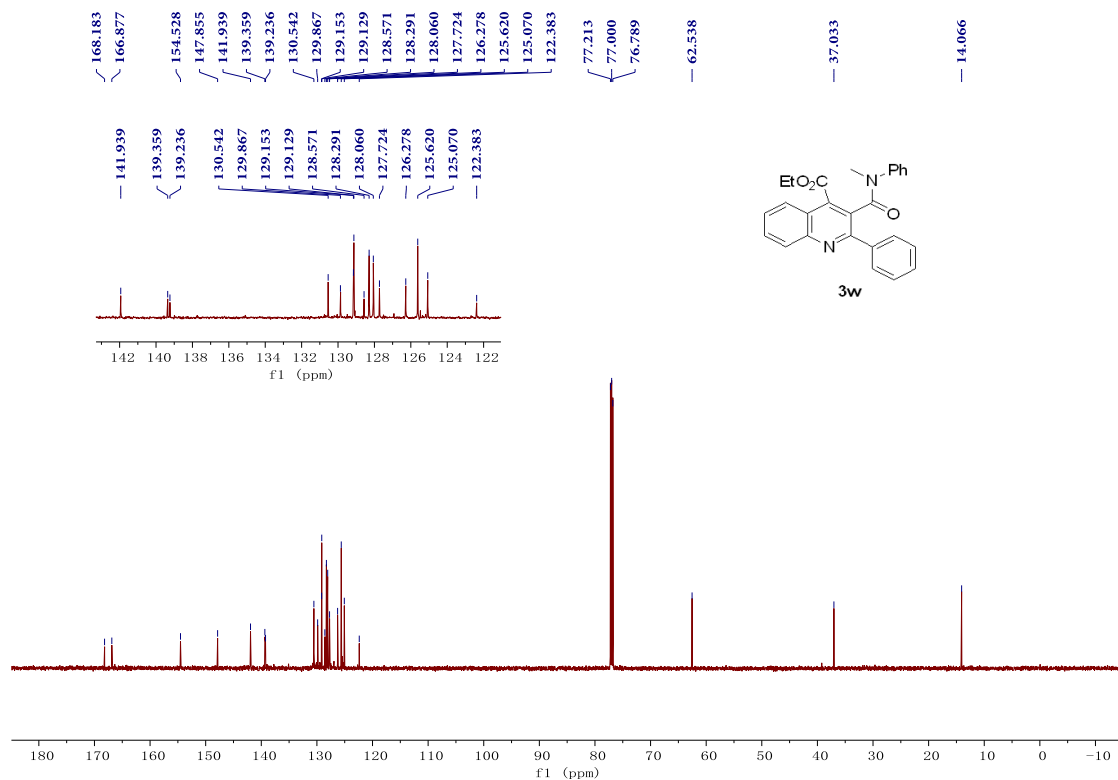

# $^1\text{H}$ NMR (500 MHz, $\text{d}^6\text{-DMSO}$ )

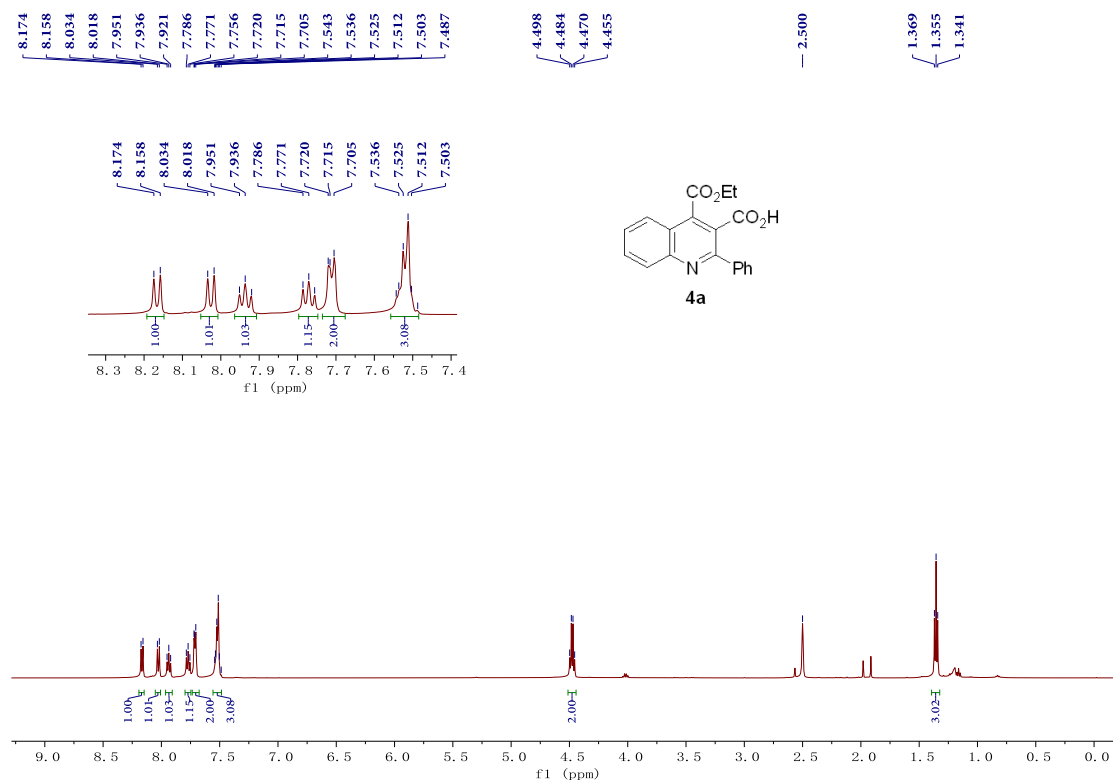

# $^{13}\text{C}$ NMR (125 MHz, $\text{d}^6\text{-DMSO}$ )

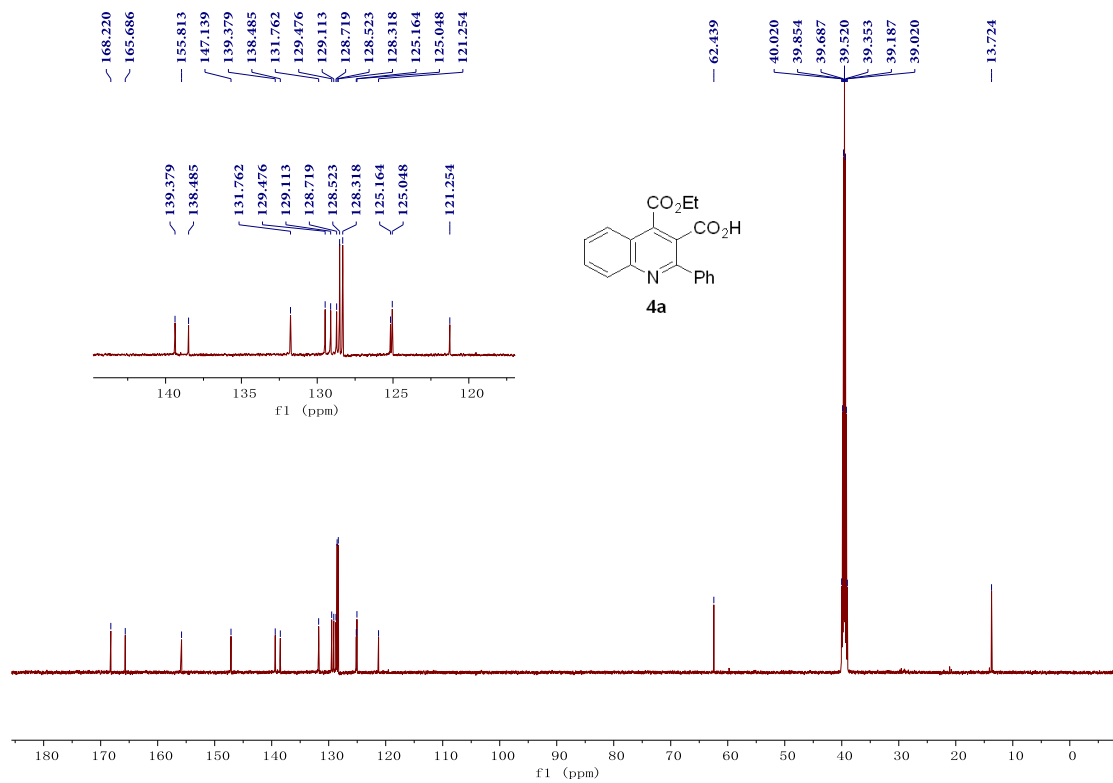



$^1\text{H}$  NMR (500 MHz,  $\text{d}^6\text{-DMSO}$ )

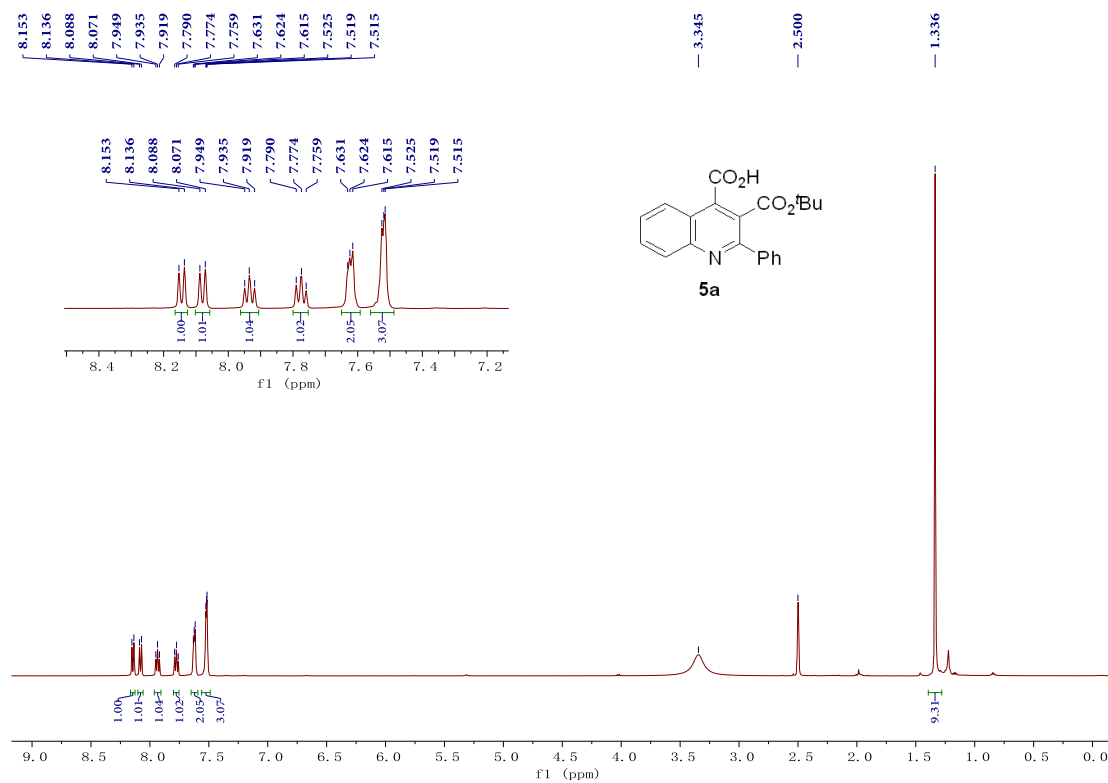

$^{13}\text{C}$  NMR (125 MHz,  $\text{d}^6\text{-DMSO}$ )

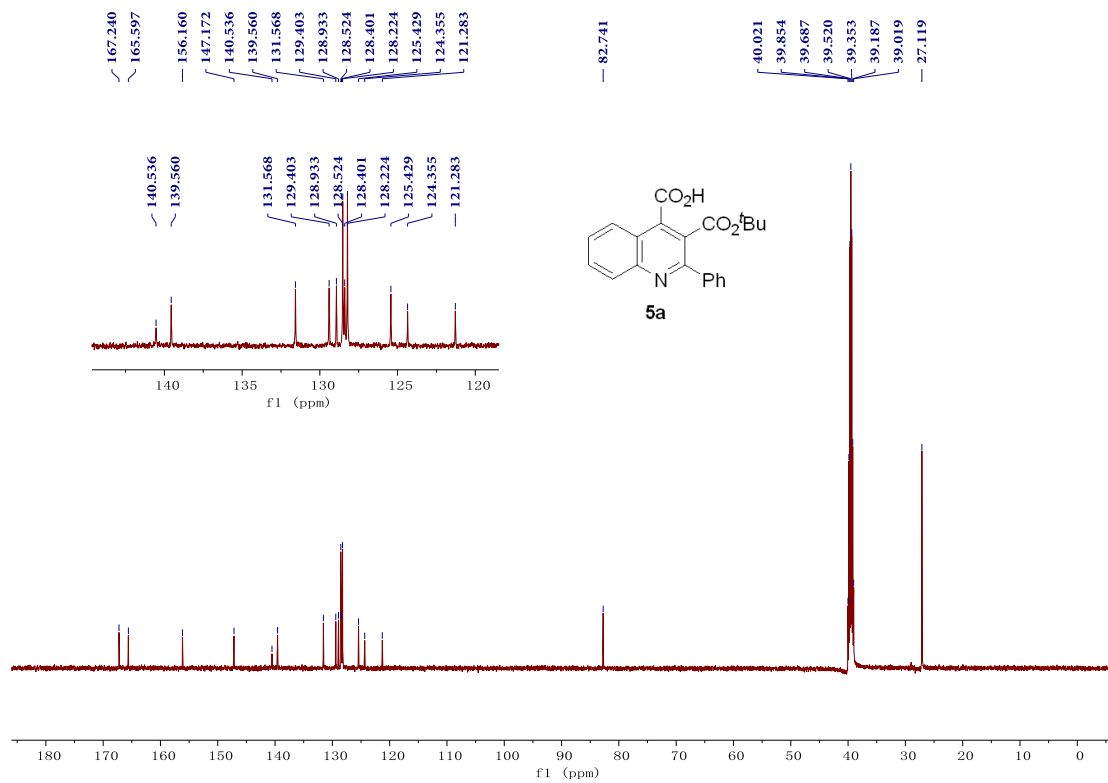

$^1\text{H}$  NMR (500 MHz,  $\text{d}^6\text{-DMSO}$ )

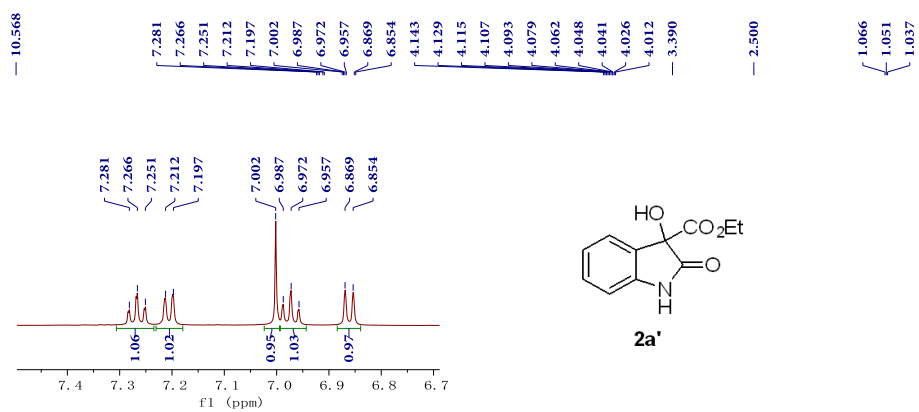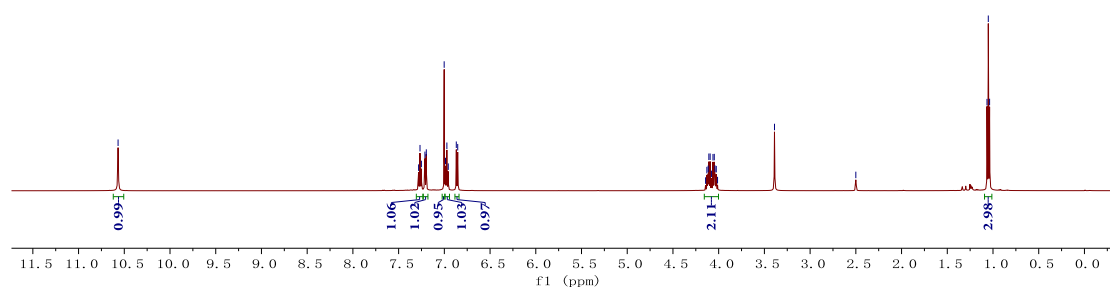

$^{13}\text{C}$  NMR (125 MHz,  $\text{d}^6\text{-DMSO}$ )

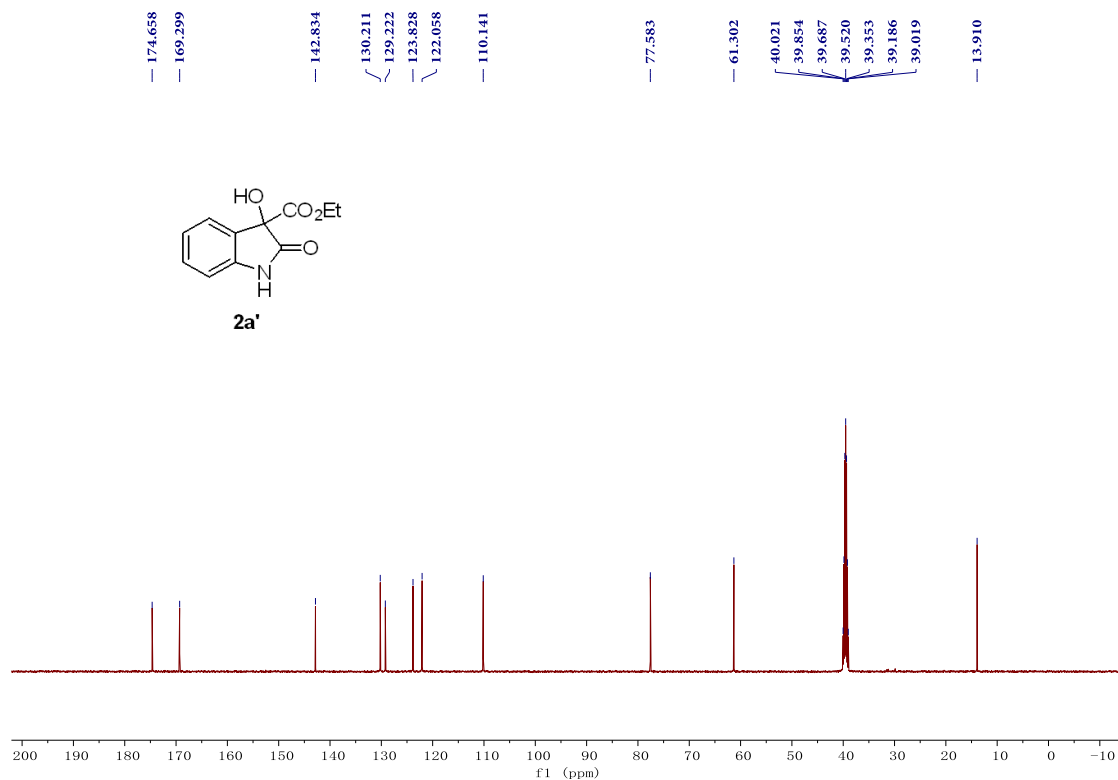

# $^1\text{H}$ NMR (500 MHz, $\text{d}^6\text{-DMSO}$ )

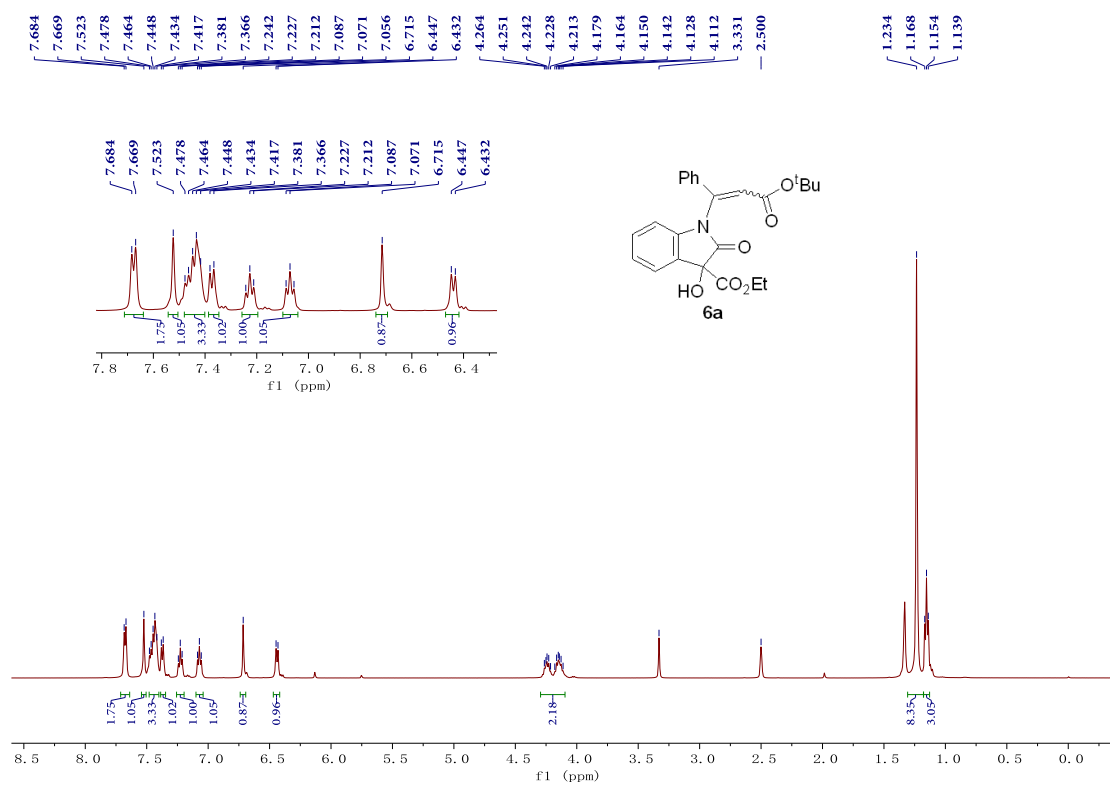

# $^{13}\text{C}$ NMR (125 MHz, $\text{d}^6\text{-DMSO}$ )

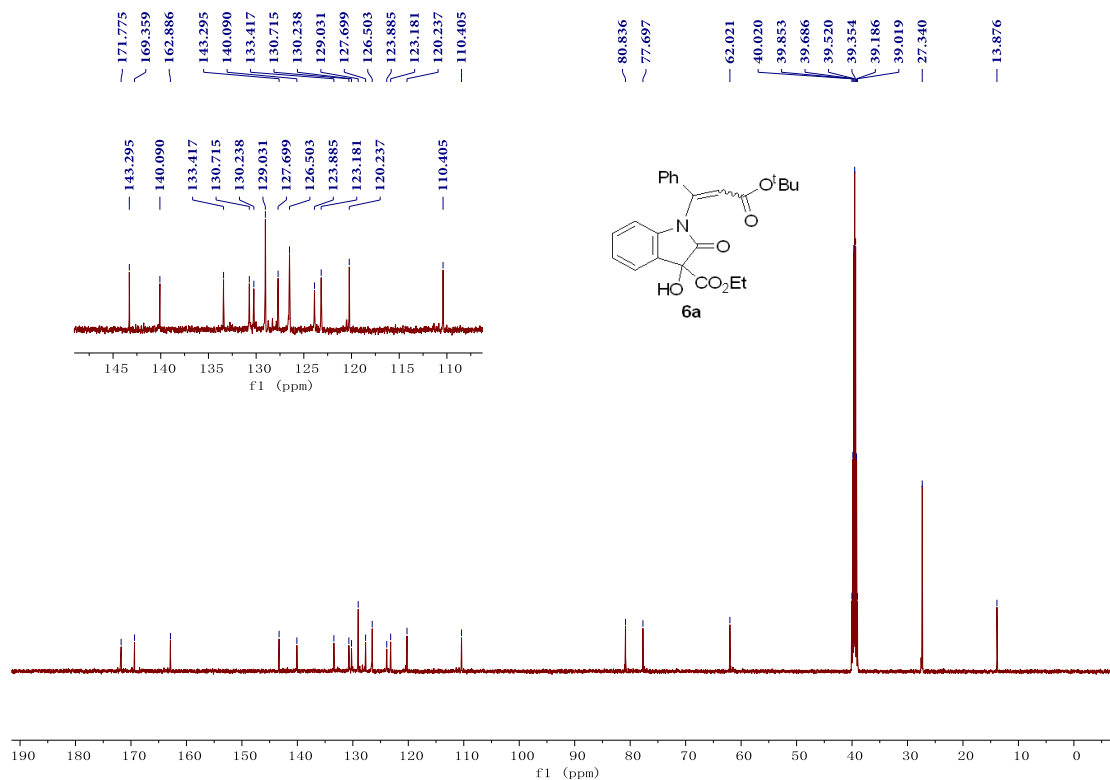

## 10. X-ray crystallography of compounds 2p and 3a.

*ethyl 2-hydroxy-5-methyl-3-oxoindoline-2-carboxylate* (**2p**, mo\_d8v23248\_0m.)

(Ortep ellipsoids are depicted at the 50% level)

Sample preparation for crystal growth: Compound **2p** (50 mg) was dissolved in the mixed solvent of dichloromethane/petroleum ether = 3 ml/6 ml in a 50 mL roundbottom flask. The yellow single crystal of **2p** was obtained by slowly evaporating mixed solvent at room temperature under air.

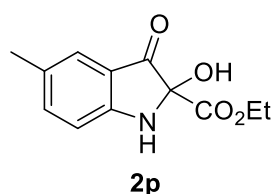

**Table S1. Crystal data and structure refinement for 2p.**

|                      |                                                                                    |
|----------------------|------------------------------------------------------------------------------------|
| Identification code  | <b>2p</b>                                                                          |
| Empirical formula    | C <sub>12</sub> H <sub>13</sub> NO <sub>4</sub>                                    |
| Formula weight       | 235.23                                                                             |
| Temperature          | 293(2) K                                                                           |
| Wavelength           | 0.71073 Å                                                                          |
| Crystal system       | Orthorhombic                                                                       |
| Space group          | P b c a                                                                            |
| Unit cell dimensions | a = 6.8757(8) Å α = 90°.<br>b = 15.6611(17) Å β = 90°.<br>c = 22.392(3) Å γ = 90°. |
| Volume               | 2411.2(5) Å <sup>3</sup>                                                           |
| Z                    | 8                                                                                  |
| Density (calculated) | 1.296 Mg/m <sup>3</sup>                                                            |

|                                   |                                             |
|-----------------------------------|---------------------------------------------|
| Absorption coefficient            | 0.098 mm <sup>-1</sup>                      |
| F(000)                            | 992                                         |
| Crystal size                      | 0.160 x 0.140 x 0.100 mm <sup>3</sup>       |
| Theta range for data collection   | 2.756 to 24.998°.                           |
| Index ranges                      | -8<=h<=8, -18<=k<=18, -26<=l<=26            |
| Reflections collected             | 14179                                       |
| Independent reflections           | 2120 [R(int) = 0.0752]                      |
| Completeness to theta = 25.242°   | 97.1 %                                      |
| Absorption correction             | Semi-empirical from equivalents             |
| Max. and min. transmission        | 0.7456 and 0.6037                           |
| Refinement method                 | Full-matrix least-squares on F <sup>2</sup> |
| Data / restraints / parameters    | 2120 / 40 / 176                             |
| Goodness-of-fit on F <sup>2</sup> | 1.128                                       |
| Final R indices [I>2sigma(I)]     | R1 = 0.1405, wR2 = 0.3813                   |
| R indices (all data)              | R1 = 0.2042, wR2 = 0.4327                   |
| Extinction coefficient            | n/a                                         |
| Largest diff. peak and hole       | 0.578 and -0.275 e.Å <sup>-3</sup>          |

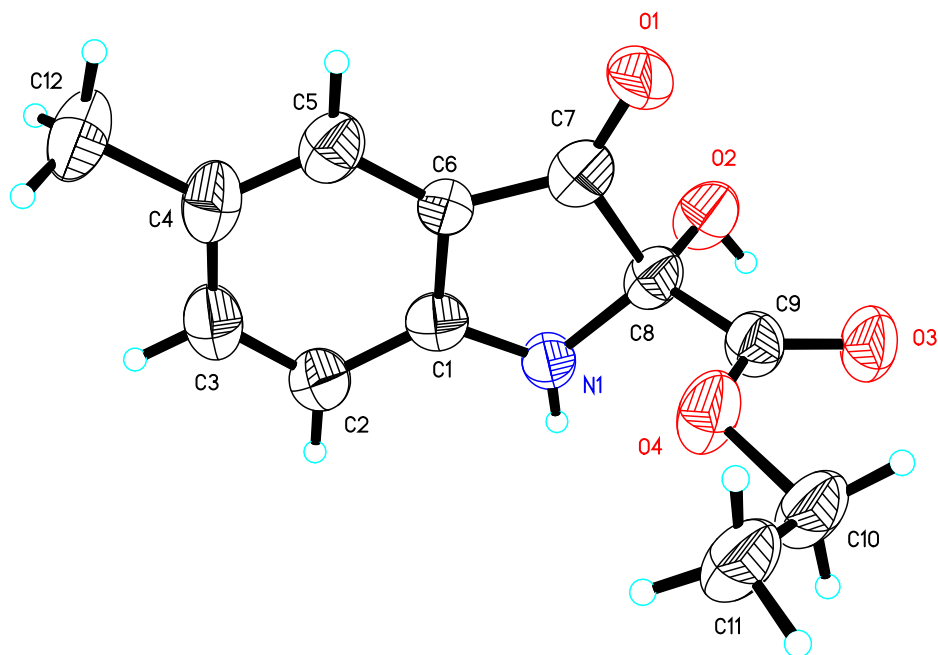

**3-(tert-butyl) 4-ethyl 2-phenylquinoline-3,4-dicarboxylate (3a, dmj8v23138\_0m.)**

(Ortep ellipsoids are depicted at the 50% level)

Sample preparation for crystal growth: Compound **3a** (50 mg) was dissolved in the mixed solvent of dichloromethane/petroleum ether = 3 ml/6 ml in a 50 mL roundbottom flask. The white single crystal of **3a** was obtained by slowly evaporating mixed solvent at room temperature under air.

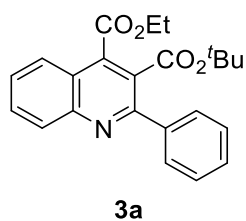

**Table S2. Crystal data and structure refinement for 3a.**

|                     |                                                 |
|---------------------|-------------------------------------------------|
| Identification code | <b>3a</b>                                       |
| Empirical formula   | C <sub>23</sub> H <sub>23</sub> NO <sub>4</sub> |
| Formula weight      | 377.42                                          |

|                                   |                                                                                                                             |
|-----------------------------------|-----------------------------------------------------------------------------------------------------------------------------|
| Temperature                       | 213(2) K                                                                                                                    |
| Wavelength                        | 1.34139 Å                                                                                                                   |
| Crystal system                    | Triclinic                                                                                                                   |
| Space group                       | P -1                                                                                                                        |
| Unit cell dimensions              | a = 8.5232(3) Å $\alpha$ = 74.518(2)°.<br>b = 10.7268(4) Å $\beta$ = 79.312(2)°.<br>c = 12.1464(4) Å $\gamma$ = 70.566(2)°. |
| Volume                            | 1003.51(6) Å <sup>3</sup>                                                                                                   |
| Z                                 | 2                                                                                                                           |
| Density (calculated)              | 1.249 Mg/m <sup>3</sup>                                                                                                     |
| Absorption coefficient            | 0.441 mm <sup>-1</sup>                                                                                                      |
| F(000)                            | 400                                                                                                                         |
| Crystal size                      | 0.140 x 0.120 x 0.090 mm <sup>3</sup>                                                                                       |
| Theta range for data collection   | 3.303 to 55.062°.                                                                                                           |
| Index ranges                      | -10 ≤ h ≤ 10, -13 ≤ k ≤ 12, -14 ≤ l ≤ 14                                                                                    |
| Reflections collected             | 10176                                                                                                                       |
| Independent reflections           | 3732 [R(int) = 0.0433]                                                                                                      |
| Completeness to theta = 25.242°   | 97.5 %                                                                                                                      |
| Absorption correction             | Semi-empirical from equivalents                                                                                             |
| Max. and min. transmission        | 0.7508 and 0.5684                                                                                                           |
| Refinement method                 | Full-matrix least-squares on F <sup>2</sup>                                                                                 |
| Data / restraints / parameters    | 3732 / 0 / 258                                                                                                              |
| Goodness-of-fit on F <sup>2</sup> | 1.142                                                                                                                       |
| Final R indices [I > 2σ(I)]       | R1 = 0.0752, wR2 = 0.1820                                                                                                   |

|                             |                                    |
|-----------------------------|------------------------------------|
| R indices (all data)        | R1 = 0.0804, wR2 = 0.1919          |
| Extinction coefficient      | 0.282(19)                          |
| Largest diff. peak and hole | 0.475 and -0.450 e.Å <sup>-3</sup> |

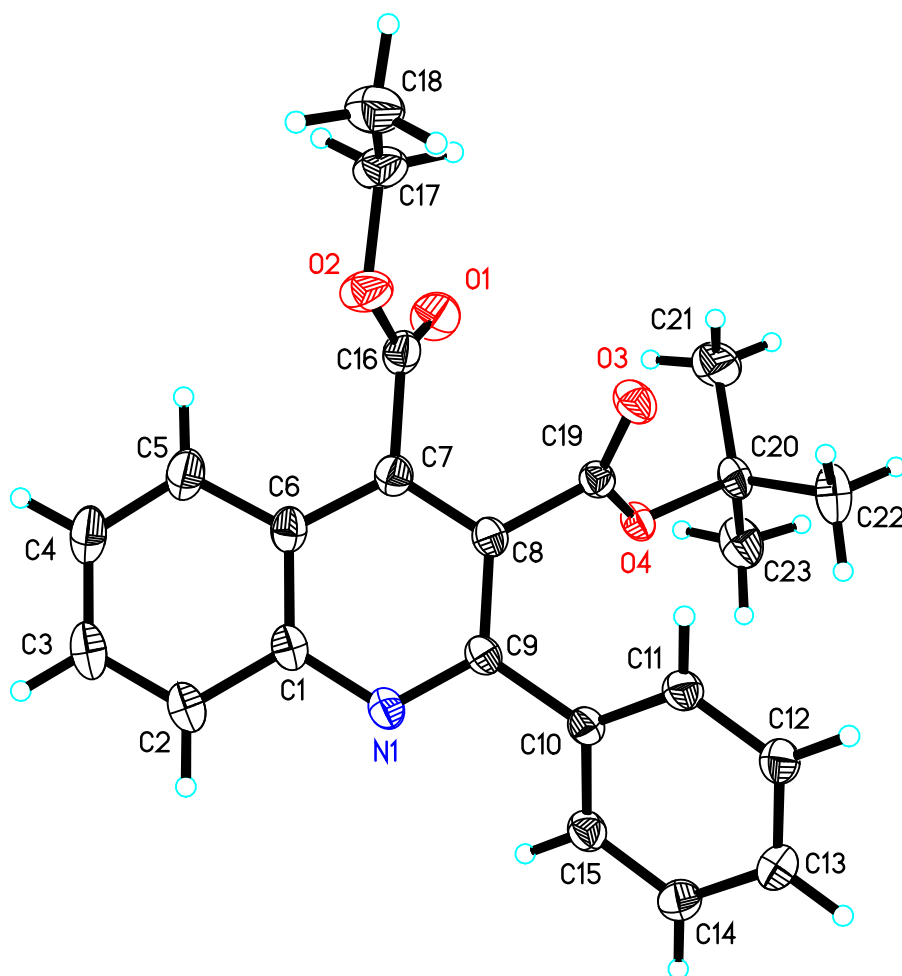

Supplement: d3qo00818e1.pdf [file d3qo00818e1.pdf]
